# Supplementary material for: Alternative polyadenylation reprogramming of MORC2 induced by NUDT21 loss promotes KIRC carcinogenesis
Source: PubMed Central journal article supplement (PMC10561724; doi:10.1172/jci.insight.162893), 2023-09-22
Supplement: jciinsight-8-162893-s031.pdf [file jciinsight-8-162893-s031.pdf]

## **Supplemental Material**

### **Alternative polyadenylation reprogramming of MORC2 induced by NUDT21 loss promotes KIRC carcinogenesis**

Yuqin Tan, Tong Zheng, Zijun Su, Min Chen, Suxiang Chen, Rui Zhang, Ruoqiao Wang, Ke Li, and Ning Na

This file contains Supplemental Figures, Supplemental Tables and Supplemental Data.

## Supplemental Figures

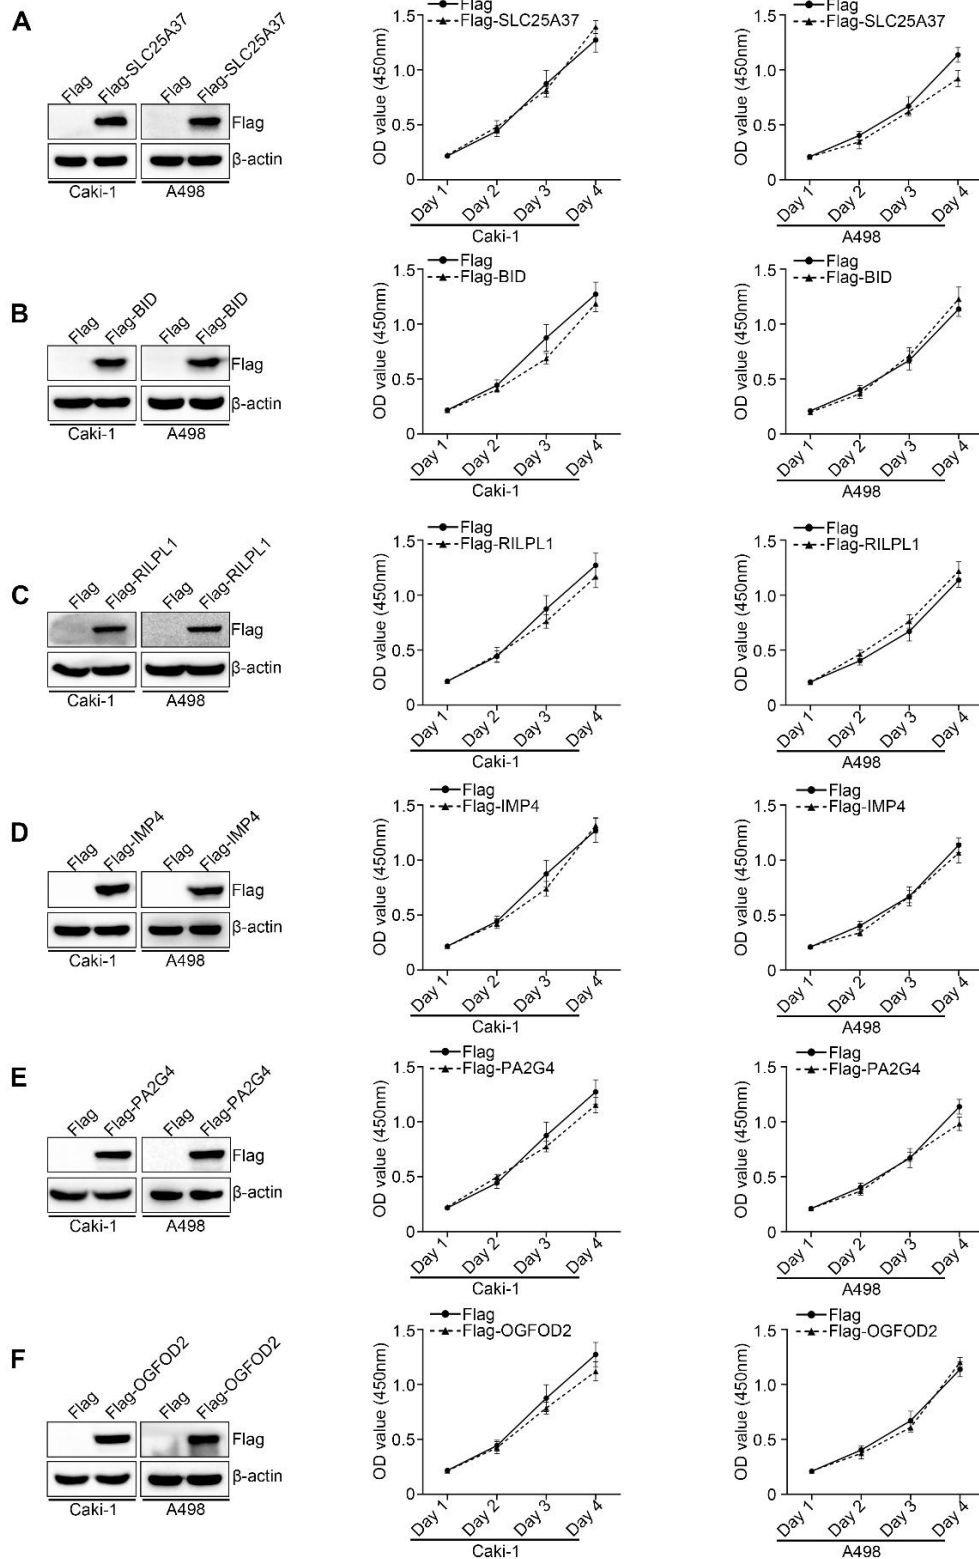

**Supplemental Figure 1. Among the genes with shortened 3'UTR in KIRC, *UCK2* and *MORC2* gain oncogenic potential.**

(A) CCK8 assay was performed to evaluate the proliferation rate of Caki-1 cells and

A498 cells transfected with empty Flag vector, Flag-SLC25A37 plasmid respectively. **(B)** CCK8 assay was performed to evaluate the proliferation rate of Caki-1 cells and A498 cells transfected with empty Flag vector, Flag-BID plasmid respectively. **(C)** CCK8 assay was performed to evaluate the proliferation rate of Caki-1 cells and A498 cells transfected with empty Flag vector, Flag-RILPL1 plasmid respectively. **(D)** CCK8 assay was performed to evaluate the proliferation rate of Caki-1 cells and A498 cells transfected with empty Flag vector, Flag-IMP4 plasmid respectively. **(E)** CCK8 assay was performed to evaluate the proliferation rate of Caki-1 cells and A498 cells transfected with empty Flag vector, Flag-PA2G4 plasmid respectively. **(F)** CCK8 assay was performed to evaluate the proliferation rate of Caki-1 cells and A498 cells transfected with empty Flag vector, Flag-OGFOD2 plasmid respectively.

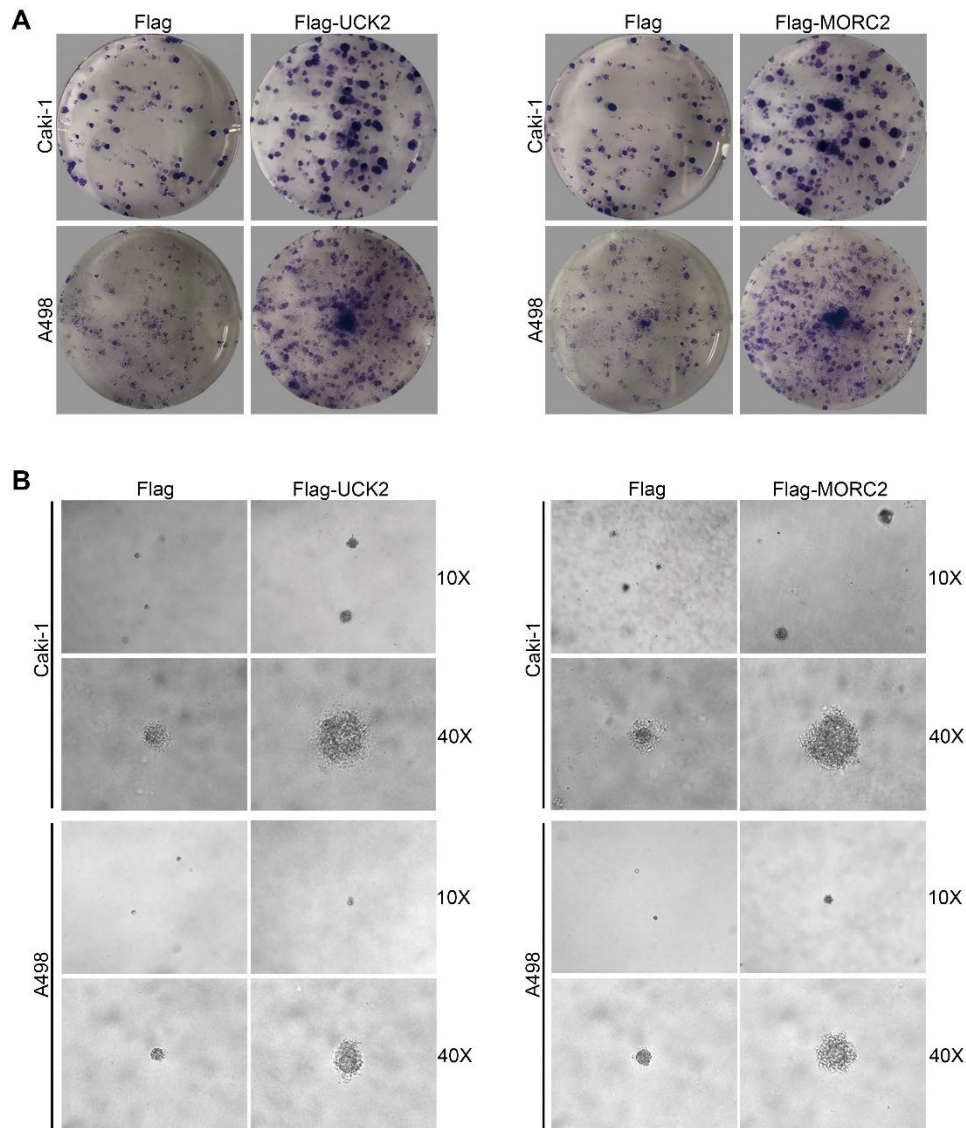

**Supplemental Figure 2. Ectopic expression of UCK2 or MORC2 favors the clonogenicity of KIRC cells.**

(A) The representative images of the clonogenicity of Caki-1 cell and A498 cells transfected with empty Flag vector, Flag-UCK2 or Flag-MORC2 plasmid respectively in colony formation assays. (B) The representative images of the clonogenicity of Caki-1 cell and A498 cells transfected with empty Flag vector, Flag-UCK2 or Flag-MORC2 plasmid respectively in soft agar assays.

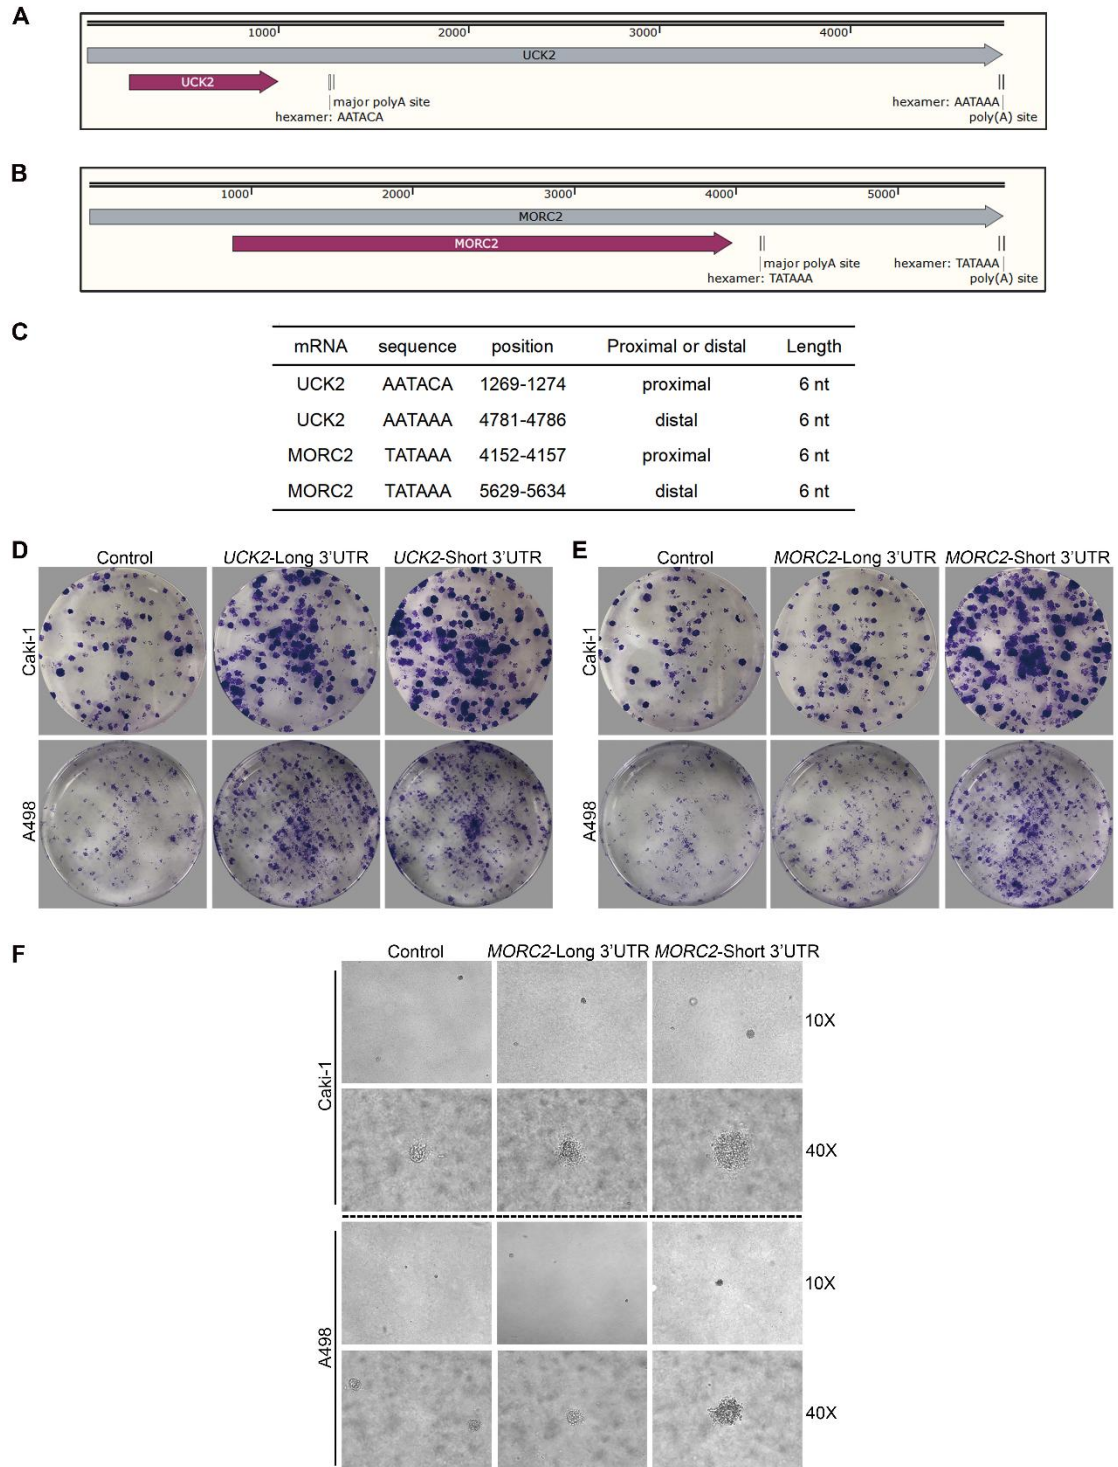

**Supplemental Figure 3. 3'UTR shortening enhances oncogenic potential of *MORC2* in KIRC via upregulating *MORC2*.**

(A) Schematic diagram indicating the proximal polyA site (pPAS) of *UCK2* from NCBI Database. (B) Schematic diagram indicating the proximal polyA site (pPAS) of *MORC2* from NCBI Database. (C) The diagram indicating the detailed information of pPAS of *UCK2* and *MORC2* from NCBI Database. (D) The representative images of

the clonogenicity of Caki-1 cell and A498 cells transfected with short- or long-3'UTR *UCK2* plasmid respectively in colony formation assays. (E) The representative images of the clonogenicity of Caki-1 cell and A498 cells transfected with short- or long-3'UTR *MORC2* plasmid respectively in colony formation assays. (F) The representative images of the clonogenicity of Caki-1 cell and A498 cells transfected with short- or long-3'UTR *MORC2* plasmid respectively in soft agar assays.

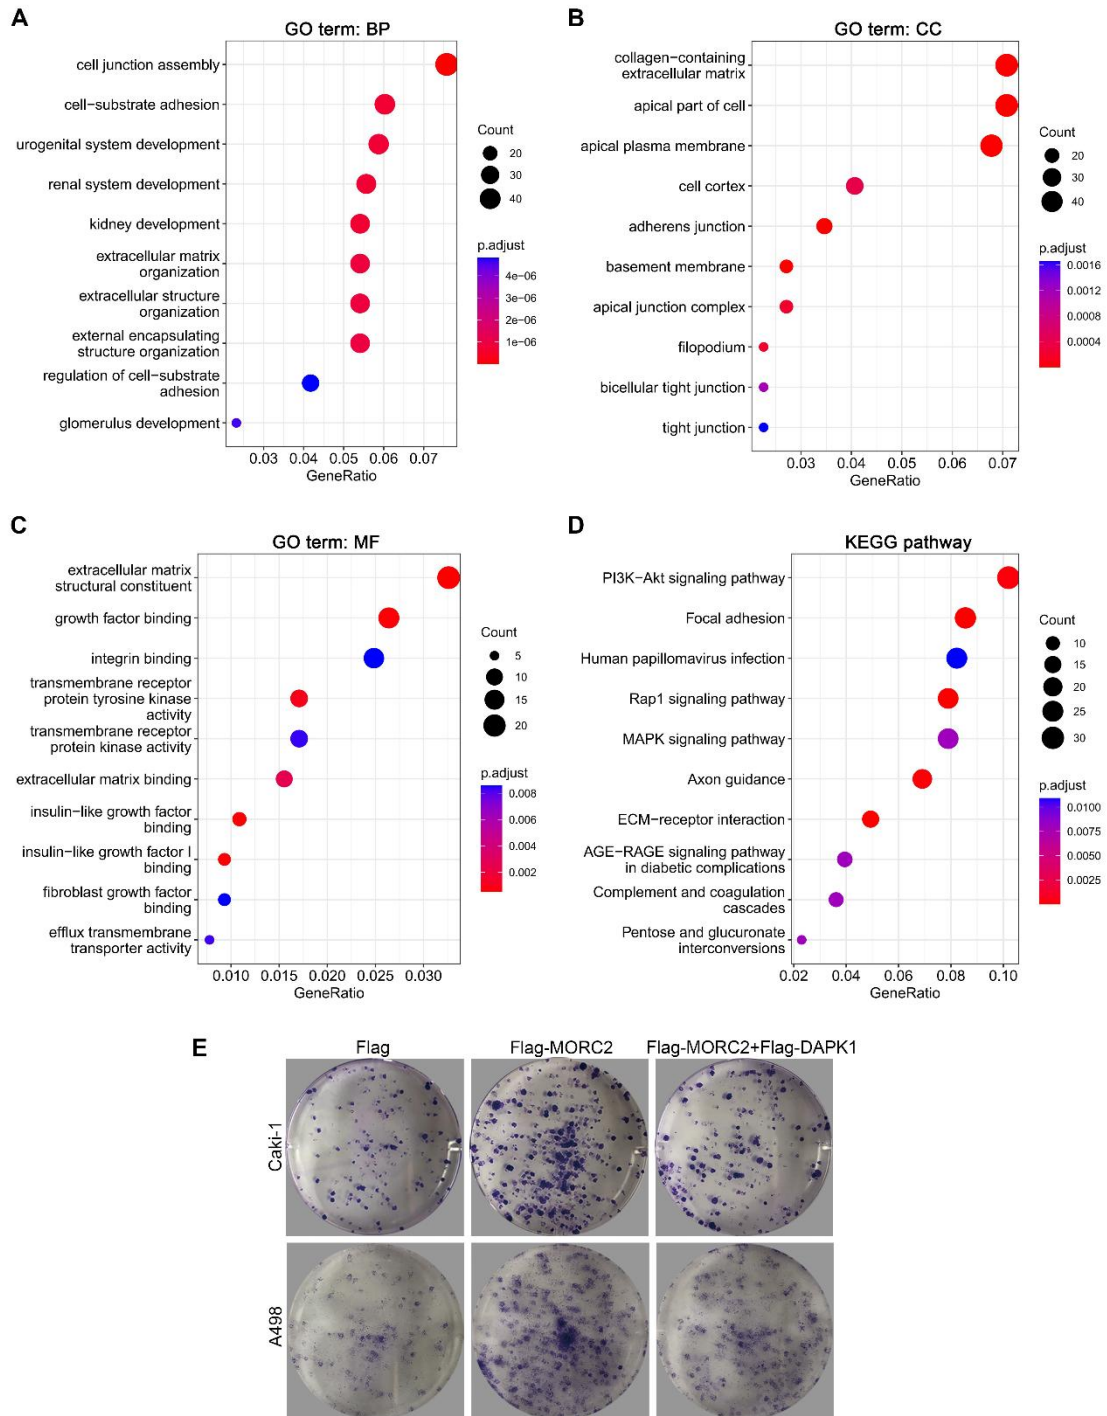

**Supplemental Figure 4. *MORC2* acts as oncogene in KIRC mainly depending on downregulating tumor suppressor *DAPK1* via DNA methylation.**

(A - C) The GO analysis of the genes downregulated by *MORC2*. (D) The KEGG analysis of the genes downregulated by *MORC2*. (E) The representative images of the clonogenicity of Caki-1 cell and A498 cells transfected with empty Flag vector or Flag-*MORC2* plasmid with or without *DAPK1* recovery.



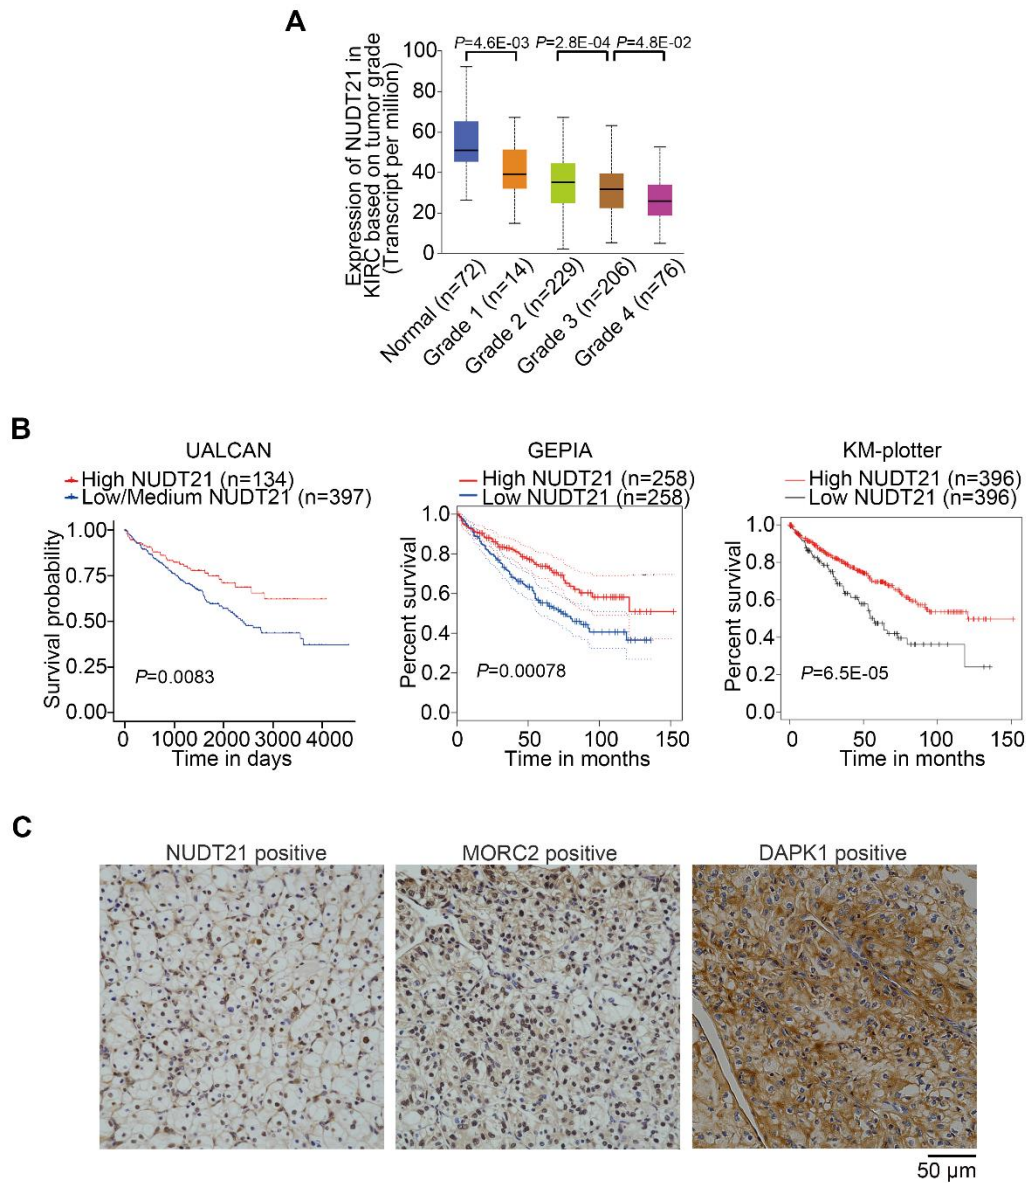

**Supplemental Figure 5. Loss of APA regulator NUDT21 induces 3'UTR shortening and downregulation of MORC2 in KIRC.**

(A) The association between *NUDT21* expression and tumor grade of KIRC was analyzed with UALCAN database. (B) Prognosis association of *NUDT21* in KIRC was analyzed with UALCAN (left), GEPIA (middle) and KM plotter (right) databases. (C) The representative IHC images of NUDT21-positive, MORC2-positive and DAPK1-positive specimens. Magnification: 40  $\times$ .



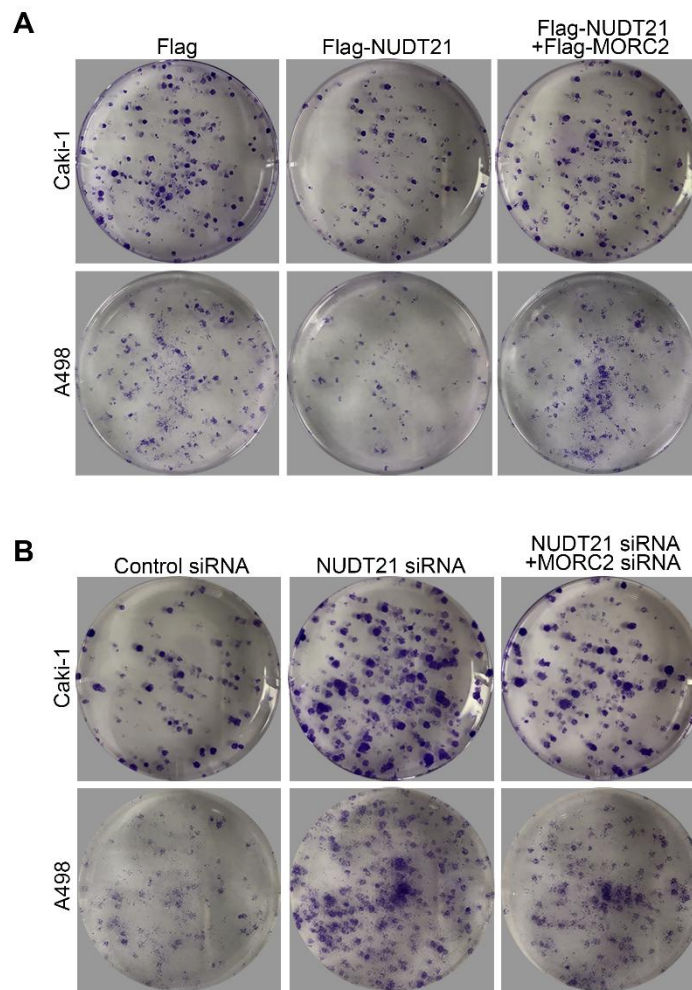

**Supplemental Figure 6. NUDT21 functions as a tumor suppressor mainly depending on MORC2 downregulation.**

(A) The representative images of the clonogenicity of Caki-1 cell and A498 cells transfected with empty Flag vector or Flag-NUDT21 with or without MORC2 recovery. (B) The representative images of the clonogenicity of Caki-1 cell and A498 cells transfected with empty Flag vector or Flag-NUDT21 with or without MORC2 recovery.

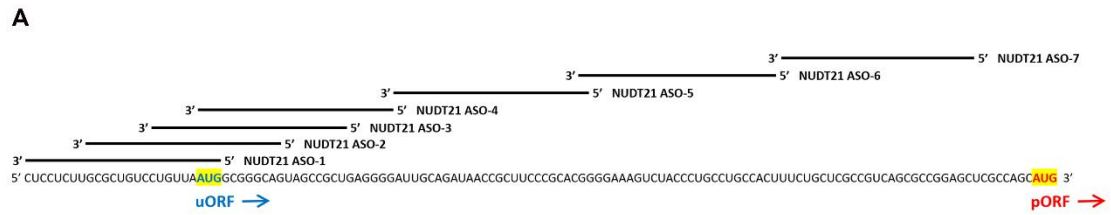

**B**

|                                                   |                                               |
|---------------------------------------------------|-----------------------------------------------|
| NUDT21 ASO-1 (+1+25): CAUUAACAGGACAGCGCAAGAGGAG   | Targeting region: CUCCUCUUGCGCUGUCCUGUUA AUG  |
| NUDT21 ASO-2 (+9+33): CUGCCCGCCAUUAACAGGACAGCGC   | Targeting region: GCGCUGUCCUGUUA AUG GCGGGCAG |
| NUDT21 ASO-3 (+17+41): AGCGGCUACUGCCCGCCAUUAACAG  | Targeting region: CUGUUA AUG GCGGGCAGUAGCCGCU |
| NUDT21 ASO-4 (+23+47): CCCUCAGCGGCUACUGCCCGCCAU   | Targeting region: AUGGCGGGCAGUAGCCGCUAGAGGGG  |
| NUDT21 ASO-5 (+48+72): CGUGCGGGAAGCGGUUAUCUGCAAU  | Targeting region: AUUGCAGAUAAACCGCUUCCCGCACG  |
| NUDT21 ASO-6 (+73+97): AGUGGCAGGCAGGGUAGACUUUCCC  | Targeting region: GGGAAAGUCUACCCUGCCTGCCACU   |
| NUDT21 ASO-7 (+98+122): GCUCCGGCGCUGACGGCGAGCAGAA | Targeting region: UUCUGCUCGCCGUCAGCGCCGGAGC   |

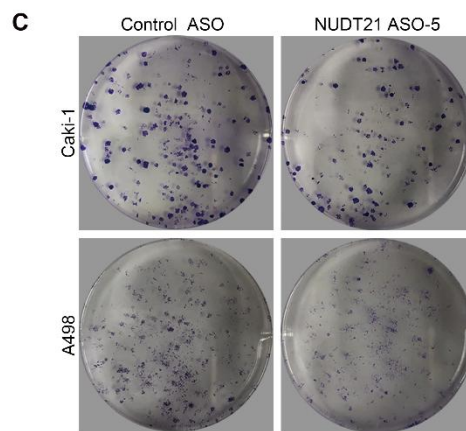

**Supplemental Figure 7. Antisense oligonucleotides (ASOs) enhancing *NUDT21* expression inhibits proliferation and clonogenicity of KIRC cells.**

(A) The diagram indicating the region of *NUDT21* mRNA which ASO-1, ASO-1, ASO-3, ASO-4, ASO-5, ASO-6 or ASO-7 targets. (B) The diagram indicating the detailed information of ASO-1, ASO-1, ASO-3, ASO-4, ASO-5, ASO-6 and ASO-7. (C) The representative images of the clonogenicity of Caki-1 cell and A498 cells transfected with control ASO or ASO-5.

**A**

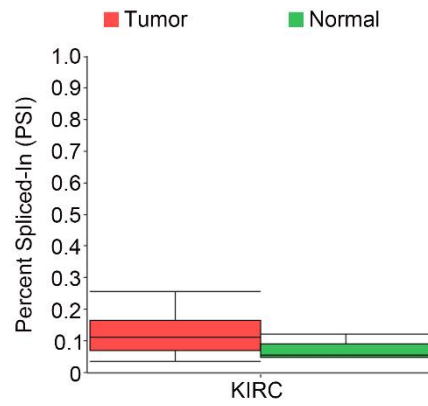

**Supplemental Figure 8. The Percent Spliced-In of *MORC2* in KIRC and normal kidney.**

(A) The Percent Spliced-In of *MORC2* in KIRC and normal kidney was analyzed with TCGA SpliceSeq Database database.

**A**

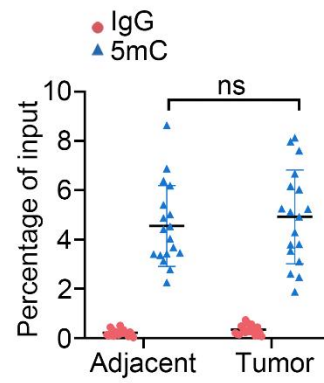

**Supplemental Figure 9. The level of promoter methylation of *MORC2* is similar in KIRC tissues and matched kidney tissues.**

(A) MeDIP assay was performed to evaluate the level of promoter methylation of *MORC2* in KIRC tissues and matched kidney tissues.

## Supplemental Tables

**Supplemental Table 1. Primers used for 3'RACE (5'-3')**

| Primers            | Sequence                      |
|--------------------|-------------------------------|
| <i>MORC2</i> GSP-1 | GGGGACTGAAGGCAGGAGAGAGAGCAGC  |
| <i>MORC2</i> GSP-2 | GGTCGCACCTTGGTTTGA CTTACACGGG |

**Supplemental Table 2. Primers used for plasmid constructions, qRT-PCR, ChIP/MeDIP and MORC2 3'UTR isoform specific PCR (5'-3')**

| Primers            | Sequence               |
|--------------------|------------------------|
| <i>SLC25A37</i> -F | ATGGAGCTGCGCAGCGGGAGC  |
| <i>SLC25A37</i> -R | GTATGGAGCTCGATTTTCCAG  |
| <i>BID</i> -F      | ATGGACTGTGAGGTCAACAAC  |
| <i>BID</i> -R      | GTCCATCCCATTTCTGGCTAA  |
| <i>UCK2</i> -F     | ATGGCCGGGACAGCGAGCAG   |
| <i>UCK2</i> -R     | ATGCGGCCTGCTGCTGGACTC  |
| <i>MORC2</i> -F    | ATGGCTTTCACAAATTACAGC  |
| <i>MORC2</i> -R    | GTCCCCCTTGGTGATGAGGTC  |
| <i>IMP4</i> -F     | ATGCTGCGCCGCGAGGCCCGC  |
| <i>IMP4</i> -R     | CTCGGTGCTCAGGAAGACTCT  |
| <i>PA2G4</i> -F    | ATGTCGGGCGAGGACGAGCAA  |
| <i>PA2G4</i> -R    | GTCCCCAGCTTCATTTTCTTC  |
| <i>OGFOD2</i> -F   | ATGGCGACGGTGGGGGCTCCG  |
| <i>OGFOD2</i> -R   | GGTGAGCGCACATACATCCAC  |
| <i>RILPL1</i> -F   | ATGGAGGAGGAGCGGGGGTCG  |
| <i>RILPL1</i> -R   | CAGATGCTGCAGGGCTTCCTG  |
| <i>DAPK1</i> -F    | ATGACCGTGTTTCAGGCAGGAA |
| <i>DAPK1</i> -R    | CCGGGATACAACAGAGCTAAT  |
| <i>DNMT3A</i> -F   | ATGCCCGCCATGCCCTCCAGC  |

---

|                                   |                         |
|-----------------------------------|-------------------------|
| <i>DNMT3A</i> -R                  | CACACACGCAAATACTCCTT    |
| <i>DNMT3B</i> -F                  | ATGAAGGGAGACACCAGGCAT   |
| <i>DNMT3B</i> -R                  | TTCACATGCAAAGTAGTCCTT   |
| <i>CPSF1</i> -F                   | ATGTACGCCGTGTACAAACAG   |
| <i>CPSF1</i> -R                   | GAAGTGGGCGGTGACGCGGTC   |
| <i>CSTF2</i> -F                   | ATGGCGGGTTTACTGTGAGA    |
| <i>CSTF2</i> -R                   | AGGTGCTCCAGTGGATTCTG    |
| <i>CPSF7</i> -F                   | ATGGGACGGCCGAGTCTGCG    |
| <i>CPSF7</i> -R                   | GTGGTGCCGGTCCCGTTCTCT   |
| <i>NUDT21</i> -F                  | ATGTCTGTGGTACCGCCAAT    |
| <i>NUDT21</i> -R                  | GTTGTAAATAAAATTGAACCT   |
| <i>PCF11</i> -F                   | ATGTCAGAGCAGACGCCGCC    |
| <i>PCF11</i> -R                   | AACTGACTCGACTGTGTCATT   |
| <i>FIP1</i> -F                    | ATGTCGGCCGGCGAGGTCGAG   |
| <i>FIP1</i> -R                    | TTCTGCAGGTGTAGCTTCGGT   |
| <i>MORC2</i> pPAS-KO-F            | GGAAAGGTGAGCCCCCAATC    |
| <i>MORC2</i> pPAS-KO-R            | AGATGAGGTGGTTAGACAGG    |
| <i>NUDT21</i> upstream specific-F | TGTTAATGGCGGGCAGTAGC    |
| <i>NUDT21</i> upstream specific-R | GACGGCGAGCAGAAAGTGGC    |
| RT- <i>GAPDH</i> -F               | ACAAC TTTGGTATCGTGGAAGG |
| RT- <i>GAPDH</i> -R               | GCCATCACGCCACAGTTTC     |
| RT- <i>HPRT</i> -F                | CCTGGCGTCGTGATTAGTGAT   |
| RT- <i>HPRT</i> -R                | AGACGTT CAGTCCTGTCCATAA |
| RT- <i>DAPK1</i> -F               | ACGTGGATGATTACTACGACACC |
| RT- <i>DAPK1</i> -R               | TGCTTTTCTCACGGCATTCT    |
| RT- <i>NUDT21</i> -F              | GGTCACTCAGTTCGGCAACAA   |
| RT- <i>NUDT21</i> -R              | CTCATGCGCTGAAATCTGGC    |
| RT- <i>MORC2</i> -Total-F         | ATGAAGTAGGGCTCCAAAAC    |
| RT- <i>MORC2</i> -Total-R         | GGTCCTCAATGTAGGCGTCC    |

---

|                            |                                                       |
|----------------------------|-------------------------------------------------------|
| RT- <i>MORC2</i> -distal-F | CTGGATGTGCCTGTCTGGTGG                                 |
| RT- <i>MORC2</i> -distal-R | TGAAGAGAGAGAGCAGGATGG                                 |
| <i>DAPK1</i> -ChIP-PCR-F   | GCCCAGCTTTAACAAAGGGTG                                 |
| <i>DAPK1</i> -ChIP-PCR-R   | CATGCATCAGTCTCCAGTCCT                                 |
| <i>DAPK1</i> -ChIP-qPCR-F  | GCCCAGCTTTAACAAAGGGTG                                 |
| <i>DAPK1</i> -ChIP-qPCR-R  | GCTAAGACCCCGCTCGCTG                                   |
| <i>NUDT21</i> -ChIP-PCR-F  | TACTGCCCCGCCATTAACAGG                                 |
| <i>NUDT21</i> -ChIP-PCR-R  | TCCAGCTATTGCAGCCATCC                                  |
| <i>NUDT21</i> -ChIP-qPCR-F | GAAGTGAACCCGGAGCCTCT                                  |
| <i>NUDT21</i> -ChIP-qPCR-R | TCCAGCTATTGCAGCCATCC                                  |
| oligo(dT) primer           | GCTGTCAACGATACGCTACGTAACGGCATGACAGTG(T) <sub>18</sub> |

**Supplemental Table 3. Sequences of siRNA and CRISPR sgRNA (5'-3')**

| siRNA or sgRNA               | Sequence                  |
|------------------------------|---------------------------|
| Negative control siRNA       | UUCUCCGAACGUGUCACGUTT     |
| <i>MORC2</i> siRNA           | GGACAUGAAGACGCAGGAATT     |
| <i>NUDT21</i> siRNA          | GCUAUUAUACAGUGUAGAAUTT    |
| <i>DNMT3A</i> siRNA-1        | GCCUGGAGCCACCAGAAGATT     |
| <i>DNMT3A</i> siRNA-2        | GAAAGCCAAGGUCAUUGCATT     |
| <i>DNMT3B</i> siRNA-1        | GCAACGAUCUCUCAAUGUTT      |
| <i>DNMT3B</i> siRNA-2        | GCUACACACAGGACUUGACTT     |
| <i>MORC2</i> KO sgRNA        | ACACCTGAGTCTACTCAGAT      |
| <i>MORC2</i> pPAS KO sgRNA-1 | ATGGGTTGGTGGTCGCACCT      |
| <i>MORC2</i> pPAS KO sgRNA-2 | GCAACCCAGTATGGCCAAAG      |
| Negative control ASO         | CCUCUUACCUCAGUUACAAUUUAUA |



**Supplemental Table 4. Biotin labeled RNA oligos for RNA-EMSA (5'-3'-Biotin)**

| <b>Oligos</b>        | <b>Sequence</b>      |
|----------------------|----------------------|
| <i>MORC2</i> WT      | CACACACAUGUAAUCGAAAC |
| <i>MORC2</i> Mutant: | CACACACACUCGAUCGAAAC |

**Supplemental Table 5. Antibodies used in this study**

| <b>Antibody</b> | <b>Vender</b>       | <b>Cat. No.</b> |
|-----------------|---------------------|-----------------|
| MORC2           | Bethyl Laboratories | A300-149        |
| Flag            | Sigma-Aldrich       | F1804           |
| 5mC             | Abcam               | ab214727        |
| $\beta$ -actin  | Abclonal            | AC026           |
| GFP             | Abclonal            | AE012           |
| DNMT3A          | CST                 | 32578           |
| DNMT3B          | CST                 | 57868           |
| DAPK1           | Abclonal            | A5741           |
| NUDT21          | Abclonal            | A4482           |

## Supplemental Data

### Supplemental Data 1. Genes with shortened 3'UTR in KIRC

| Event_id                     | KIRC         |
|------------------------------|--------------|
| NM_024731 KLHL36 chr16 +     | -0.460625    |
| NM_001190738 NFIB chr9 -     | -0.455       |
| NM_001135652 EIF2AK2 chr2 -  | -0.45037037  |
| NM_001142386 PDK3 chrX +     | -0.425714286 |
| NM_152793 C7orf41 chr7 +     | -0.422916667 |
| NM_001164182 ENTPD1 chr10 +  | -0.420857143 |
| NM_003599 SUPT3H chr6 -      | -0.405909091 |
| NM_018941 CLN8 chr8 +        | -0.399583333 |
| PPP2R5C chr14 +              | -0.373341211 |
| NM_005349 RBPJ chr4 +        | -0.37125     |
| NM_173829 SREK1IP1 chr5 -    | -0.361875    |
| NM_004928 C21orf2 chr21 -    | -0.361724138 |
| NM_001110792 MECP2 chrX -    | -0.358       |
| NM_001134232 TMEM106B chr7 + | -0.3568      |
| NM_001098517 CADM1 chr11 -   | -0.350625    |
| NM_001173480 ARHGEF9 chrX -  | -0.348235294 |
| NM_001040445 ASB1 chr2 +     | -0.347407407 |
| NM_015459 ATL3 chr11 -       | -0.345       |
| NR_002791 EMX2OS chr10 -     | -0.338235294 |
| NR_023348 GAS8 chr16 +       | -0.336153846 |
| NM_015035 ZHX3 chr20 -       | -0.334782609 |
| NM_001424 EMP2 chr16 -       | -0.334210526 |
| NM_016418 NF2 chr22 +        | -0.332666667 |
| NM_175624 RAB3IP chr12 +     | -0.32952381  |
| NM_001142389 PNPLA4 chrX -   | -0.328333333 |
| NM_005793 NME6 chr3 -        | -0.3275      |
| NM_001004313 TMEM220 chr17 - | -0.324375    |
| NM_205861 DHDDS chr1 +       | -0.322666667 |
| NM_001204064 CHURC1 chr14 +  | -0.32125     |
| NM_003300 TRAF3 chr14 +      | -0.320625    |
| NM_015704 PPPDE2 chr22 -     | -0.319310345 |
| NM_153029 N4BP1 chr16 -      | -0.318888889 |
| NM_001037333 CYFIP2 chr5 +   | -0.318181818 |
| NM_005124 NUP153 chr6 -      | -0.318125    |
| NM_005759 ABI2 chr2 +        | -0.316923077 |
| GLS chr2 +                   | -0.316702851 |
| NM_001173431 OBSL1 chr2 -    | -0.315333333 |
| NM_016612 SLC25A37 chr8 +    | -0.314857143 |

|                                 |              |
|---------------------------------|--------------|
| NM_001196 BID chr22 -           | -0.313076923 |
| NM_000428 LTBP2 chr14 -         | -0.311923077 |
| NM_003875 GMPS chr3 +           | -0.311818182 |
| NM_001105069 ACSM2B chr16 -     | -0.310555556 |
| NM_004863 SPTLC2 chr14 -        | -0.309047619 |
| NR_033361 TMCC1 chr3 -          | -0.308409091 |
| NM_032812 PLXDC2 chr10 +        | -0.308333333 |
| NM_139062 CSNK1D chr17 -        | -0.307948718 |
| NM_024632 SAP30L chr5 +         | -0.305789474 |
| NM_020696 KIAA1143 chr3 -       | -0.305       |
| NM_000259 MYO5A chr15 -         | -0.303461538 |
| NM_178314 RILPL1 chr12 -        | -0.303181818 |
| PCGF5 chr10 +                   | -0.302195945 |
| NM_016422 RNF141 chr11 -        | -0.300588235 |
| NR_015341 LRRC37BP1 chr17 +     | -0.3         |
| NM_001076684 UBTF chr17 -       | -0.298666667 |
| NM_002141 HOXA4 chr7 -          | -0.298333333 |
| NM_001202470 RPS10-NUDT3 chr6 - | -0.298235294 |
| NM_001184723 TM4SF18 chr3 -     | -0.298214286 |
| NM_152416 C8orf38 chr8 +        | -0.298       |
| NM_152734 C6orf89 chr6 +        | -0.295454545 |
| NM_013321 SNX8 chr7 -           | -0.295416667 |
| NM_001012973 PLAC9 chr10 +      | -0.294782609 |
| DEF8 chr16 +                    | -0.294714747 |
| NM_014965 TRAK1 chr3 +          | -0.294705882 |
| NM_015255 UBR2 chr6 +           | -0.294615385 |
| NM_178012 TUBB2B chr6 -         | -0.294583333 |
| NM_032448 FAM120B chr6 +        | -0.293181818 |
| NM_015944 AMDHD2 chr16 +        | -0.293043478 |
| NM_022899 ACTR8 chr3 -          | -0.292142857 |
| NM_003818 CDS2 chr20 +          | -0.291764706 |
| NM_012474 UCK2 chr1 +           | -0.291111111 |
| NM_005008 NHP2L1 chr22 -        | -0.290869565 |
| NM_014934 DZIP1 chr13 -         | -0.2908      |
| NM_012192 FXC1 chr11 +          | -0.290714286 |
| NM_013449 BAZ2A chr12 -         | -0.29        |
| NM_015305 ANGEL1 chr14 -        | -0.289411765 |
| NM_018697 LANCL2 chr7 +         | -0.2875      |
| NM_001145354 MKLN1 chr7 +       | -0.287333333 |
| NM_004804 CIAO1 chr2 +          | -0.2865      |
| NM_012345 NUFIP1 chr13 -        | -0.286470588 |
| NM_015607 CHTOP chr1 +          | -0.28625     |
| NM_002154 HSPA4 chr5 +          | -0.2859375   |

|                             |              |
|-----------------------------|--------------|
| NM_002936 RNASEH1 chr2 -    | -0.285714286 |
| NM_001206652 SH3GLB1 chr1 + | -0.285333333 |
| NM_003177 SYK chr9 +        | -0.284117647 |
| FLT1 chr13 -                | -0.2839709   |
| NM_030813 CLPB chr11 -      | -0.282222222 |
| NM_003681 PDXK chr21 +      | -0.281875    |
| BCCIP chr10 +               | -0.280160305 |
| NM_006741 PPP1R1A chr12 -   | -0.28        |
| NM_014941 MORC2 chr22 -     | -0.279722222 |
| NM_033416 IMP4 chr2 +       | -0.279130435 |
| NM_015321 CRTC1 chr19 +     | -0.278888889 |
| NM_016329 SFMBT1 chr3 -     | -0.27875     |
| NM_183323 PAIP1 chr5 -      | -0.278       |
| NM_017670 OTUB1 chr11 +     | -0.277333333 |
| NM_152388 TMEM237 chr2 -    | -0.276470588 |
| NM_020320 RARS2 chr6 -      | -0.275       |
| FGFR1OP2 chr12 +            | -0.273595038 |
| NM_033637 BTRC chr10 +      | -0.273571429 |
| NM_012141 INTS6 chr13 -     | -0.272142857 |
| NM_001173513 TXNRD3 chr3 -  | -0.271428571 |
| RPP30 chr10 +               | -0.269744303 |
| NM_006110 CD2BP2 chr16 -    | -0.269285714 |
| NM_020374 C12orf4 chr12 -   | -0.269166667 |
| NAAA chr4 -                 | -0.268142971 |
| NM_153329 ALDH16A1 chr19 +  | -0.267333333 |
| NM_206831 DPH3 chr3 -       | -0.267142857 |
| NM_016141 DYNC1LI1 chr3 -   | -0.266875    |
| NM_183245 INVS chr9 +       | -0.266875    |
| NM_006191 PA2G4 chr12 +     | -0.2635      |
| NM_172250 MMAA chr4 +       | -0.262666667 |
| NM_203458 NOTCH2NL chr1 +   | -0.262       |
| NM_015247 CYLD chr16 +      | -0.261428571 |
| NM_003062 SLIT3 chr5 -      | -0.260588235 |
| PVRL2 chr19 +               | -0.257987638 |
| NM_138991 BACE2 chr21 +     | -0.257777778 |
| NM_152346 SLC43A2 chr17 -   | -0.257727273 |
| NM_017872 THG1L chr5 +      | -0.256315789 |
| CYHR1 chr8 -                | -0.255828417 |
| NM_016185 HN1 chr17 -       | -0.253157895 |
| NM_001160305 SETD6 chr16 +  | -0.253       |
| NM_017994 C7orf42 chr7 +    | -0.2525      |
| NM_017896 C20orf11 chr20 +  | -0.251764706 |
| NM_018003 UACA chr15 -      | -0.250909091 |

|                          |              |
|--------------------------|--------------|
| NM_020662 MRS2 chr6 +    | -0.248947368 |
| NM_198901 SRI chr7 -     | -0.2455      |
| NM_022455 NSD1 chr5 +    | -0.245       |
| NM_016138 COQ7 chr16 +   | -0.242352941 |
| NM_130759 GIMAP1 chr7 +  | -0.242       |
| NM_024562 TMCO7 chr16 +  | -0.24125     |
| NM_002634 PHB chr17 -    | -0.24        |
| NM_012472 LRRC6 chr8 -   | -0.238571429 |
| NM_024623 OGFOD2 chr12 + | -0.221333333 |

**Supplemental Data 2. Downregulated genes upon MORC2 overexpression**

| Gene id         | Gene name | Fold change | log <sub>2</sub> (fc) | P value |
|-----------------|-----------|-------------|-----------------------|---------|
| ENSG00000137801 | THBS1     | 0.03        | -4.95                 | 0       |
| ENSG00000165376 | CLDN2     | 0.01        | -6.08                 | 0       |
| ENSG00000151892 | GFRA1     | 0.02        | -5.84                 | 0       |
| ENSG00000272398 | CD24      | 0.01        | -7.15                 | 0       |
| ENSG00000146674 | IGFBP3    | 0.09        | -3.54                 | 0.00    |
| ENSG00000120594 | PLXDC2    | 0.10        | -3.35                 | 0.00    |
| ENSG00000038427 | VCAN      | 0.11        | -3.20                 | 0.00    |
| ENSG00000122870 | BICC1     | 0.18        | -2.45                 | 0.00    |
| ENSG00000137731 | FXYD2     | 0.07        | -3.77                 | 0.00    |
| ENSG00000108861 | DUSP3     | 0.14        | -2.82                 | 0.00    |
| ENSG00000225339 | AL354740  | 0.04        | -4.57                 | 0.00    |
| ENSG00000101384 | JAG1      | 0.14        | -2.80                 | 0.00    |
| ENSG00000158258 | CLSTN2    | 0.01        | -6.26                 | 0.00    |
| ENSG00000137962 | ARHGAP29  | 0.19        | -2.37                 | 0.00    |
| ENSG00000168077 | SCARA3    | 0.11        | -3.12                 | 0.00    |
| ENSG00000134516 | DOCK2     | 0.24        | -2.06                 | 0.00    |
| ENSG00000113361 | CDH6      | 0.27        | -1.88                 | 0.00    |
| ENSG00000120885 | CLU       | 0.25        | -2.01                 | 0.00    |
| ENSG00000105855 | ITGB8     | 0.09        | -3.45                 | 0.00    |
| ENSG00000118898 | PPL       | 0.10        | -3.27                 | 0.00    |
| ENSG00000163453 | IGFBP7    | 0.32        | -1.65                 | 0.00    |
| ENSG00000065534 | MYLK      | 0.24        | -2.07                 | 0.00    |
| ENSG00000166833 | NAV2      | 0.18        | -2.49                 | 0.00    |
| ENSG00000198074 | AKR1B10   | 0.16        | -2.65                 | 0.00    |
| ENSG00000019505 | SYT13     | 0.28        | -1.85                 | 0.00    |
| ENSG00000134215 | VAV3      | 0.08        | -3.64                 | 0.00    |
| ENSG00000115221 | ITGB6     | 0.12        | -3.03                 | 0.00    |
| ENSG00000101333 | PLCB4     | 0.20        | -2.34                 | 0.00    |
| ENSG00000259207 | ITGB3     | 0.30        | -1.76                 | 0.00    |
| ENSG00000162692 | VCAM1     | 0.27        | -1.91                 | 0.00    |
| ENSG00000182168 | UNC5C     | 0.04        | -4.50                 | 0.00    |
| ENSG00000196730 | DAPK1     | 0.18        | -2.46                 | 0.00    |
| ENSG00000057019 | DCBLD2    | 0.32        | -1.63                 | 0.00    |
| ENSG00000152952 | PLOD2     | 0.31        | -1.71                 | 0.00    |
| ENSG00000112769 | LAMA4     | 0.33        | -1.61                 | 0.00    |
| ENSG00000145147 | SLIT2     | 0.07        | -3.88                 | 0.00    |
| ENSG00000206190 | ATP10A    | 0.10        | -3.30                 | 0.00    |
| ENSG00000091656 | ZFHX4     | 0.26        | -1.94                 | 0.00    |
| ENSG00000275410 | HNF1B     | 0.28        | -1.86                 | 0.00    |
| ENSG00000183018 | SPNS2     | 0.04        | -4.55                 | 0.00    |
| ENSG00000163235 | TGFA      | 0.35        | -1.50                 | 0.00    |
| ENSG00000136883 | KIF12     | 0.10        | -3.31                 | 0.00    |
| ENSG00000083857 | FAT1      | 0.38        | -1.40                 | 0.00    |
| ENSG00000120738 | EGR1      | 0.16        | -2.61                 | 0.00    |
| ENSG00000123485 | HIURP     | 0.33        | -1.61                 | 0.00    |
| ENSG00000064042 | LIMCH1    | 0.31        | -1.67                 | 0.00    |
| ENSG00000150938 | CRIM1     | 0.33        | -1.62                 | 0.00    |
| ENSG00000154229 | PRKCA     | 0.38        | -1.38                 | 0.00    |
| ENSG00000019991 | HGF       | 0.02        | -5.47                 | 0.00    |
| ENSG00000189056 | RELN      | 0.25        | -1.99                 | 0.00    |
| ENSG00000112175 | BMP5      | 0.15        | -2.78                 | 0.00    |
| ENSG00000109321 | AREG      | 0.37        | -1.42                 | 0.00    |
| ENSG00000198796 | ALPK2     | 0.19        | -2.43                 | 0.00    |
| ENSG00000173482 | PTPRM     | 0.37        | -1.44                 | 0.00    |
| ENSG00000053747 | LAMA3     | 0.36        | -1.48                 | 0.00    |
| ENSG00000090530 | P3H2      | 0.33        | -1.59                 | 0.00    |
| ENSG00000113249 | HAVCR1    | 0.31        | -1.70                 | 0.00    |

|                 |             |      |       |      |
|-----------------|-------------|------|-------|------|
| ENSG00000149948 | HMGA2       | 0.38 | -1.39 | 0.00 |
| ENSG00000142910 | TINAGL1     | 0.20 | -2.29 | 0.00 |
| ENSG00000196139 | AKR1C3      | 0.43 | -1.22 | 0.00 |
| ENSG00000148498 | PARD3       | 0.38 | -1.38 | 0.00 |
| ENSG00000086062 | B4GALT1     | 0.39 | -1.34 | 0.00 |
| ENSG00000134871 | COL4A2      | 0.43 | -1.23 | 0.00 |
| ENSG00000158089 | GALNT14     | 0.31 | -1.68 | 0.00 |
| ENSG00000133131 | MORC4       | 0.38 | -1.40 | 0.00 |
| ENSG00000112414 | ADGRG6      | 0.09 | -3.42 | 0.00 |
| ENSG00000187498 | COL4A1      | 0.42 | -1.25 | 0.00 |
| ENSG00000105329 | TGFB1       | 0.33 | -1.62 | 0.00 |
| ENSG00000143126 | CELSR2      | 0.24 | -2.03 | 0.00 |
| ENSG00000143674 | MAP3K21     | 0.32 | -1.64 | 0.00 |
| ENSG00000134901 | POGLUT2     | 0.32 | -1.66 | 0.00 |
| ENSG00000169439 | SDC2        | 0.17 | -2.59 | 0.00 |
| ENSG00000242265 | PEG10       | 0.38 | -1.41 | 0.00 |
| ENSG00000117115 | PADI2       | 0.18 | -2.51 | 0.00 |
| ENSG00000163629 | PTPN13      | 0.26 | -1.92 | 0.00 |
| ENSG00000075223 | SEMA3C      | 0.38 | -1.39 | 0.00 |
| ENSG00000182809 | CRIP2       | 0.17 | -2.53 | 0.00 |
| ENSG00000265972 | TXNIP       | 0.40 | -1.31 | 0.00 |
| ENSG00000148468 | FAM171A1    | 0.32 | -1.65 | 0.00 |
| ENSG00000054654 | SYNE2       | 0.21 | -2.28 | 0.00 |
| ENSG00000169604 | ANTXR1      | 0.36 | -1.49 | 0.00 |
| ENSG00000078725 | BRINP1      | 0.09 | -3.54 | 0.00 |
| ENSG00000152377 | SPOCK1      | 0.42 | -1.24 | 0.00 |
| ENSG00000188483 | IER5L       | 0.27 | -1.91 | 0.00 |
| ENSG00000185551 | NR2F2       | 0.44 | -1.20 | 0.00 |
| ENSG00000064393 | HIPK2       | 0.44 | -1.17 | 0.00 |
| ENSG00000168502 | MTCL1       | 0.37 | -1.44 | 0.00 |
| ENSG00000146555 | SDK1        | 0.20 | -2.31 | 0.00 |
| ENSG00000130702 | LAMA5       | 0.32 | -1.62 | 0.00 |
| ENSG00000124602 | UNC5CL      | 0.07 | -3.84 | 0.00 |
| ENSG00000152818 | UTRN        | 0.27 | -1.87 | 0.00 |
| ENSG00000188158 | NHS         | 0.16 | -2.60 | 0.00 |
| ENSG00000184349 | EFNA5       | 0.28 | -1.86 | 0.00 |
| ENSG00000125257 | ABCC4       | 0.38 | -1.41 | 0.00 |
| ENSG00000166741 | NNMT        | 0.43 | -1.23 | 0.00 |
| ENSG00000102271 | KLHL4       | 0.09 | -3.48 | 0.00 |
| ENSG00000147676 | MAL2        | 0.24 | -2.03 | 0.00 |
| ENSG00000080823 | MOK         | 0.32 | -1.65 | 0.00 |
| ENSG00000128849 | CGNL1       | 0.24 | -2.07 | 0.00 |
| ENSG00000183780 | SLC35F3     | 0.15 | -2.77 | 0.00 |
| ENSG00000002587 | HS3ST1      | 0.12 | -3.06 | 0.00 |
| ENSG00000171234 | UGT2B7      | 0.30 | -1.76 | 0.00 |
| ENSG00000151632 | AKR1C2      | 0.28 | -1.84 | 0.00 |
| ENSG00000183098 | GPC6        | 0.31 | -1.67 | 0.00 |
| ENSG00000187244 | BCAM        | 0.15 | -2.77 | 0.00 |
| ENSG00000152767 | FARP1       | 0.37 | -1.44 | 0.00 |
| ENSG00000135919 | SERPINE2    | 0.29 | -1.77 | 0.00 |
| ENSG00000172296 | SPTLC3      | 0.29 | -1.78 | 0.00 |
| ENSG00000187764 | SEMA4D      | 0.40 | -1.33 | 0.00 |
| ENSG00000061918 | GUCY1B1     | 0.20 | -2.34 | 0.00 |
| ENSG00000001617 | SEMA3F      | 0.25 | -1.98 | 0.00 |
| ENSG00000151914 | DST         | 0.38 | -1.40 | 0.00 |
| ENSG00000286546 | AL079338    | 0.25 | -1.98 | 0.00 |
| ENSG00000085563 | ABCB1       | 0.21 | -2.29 | 0.00 |
| ENSG00000283154 | IOCJ-SCHIP1 | 0.25 | -2.00 | 0.00 |
| ENSG00000131069 | ACSS2       | 0.33 | -1.59 | 0.00 |
| ENSG00000134986 | NREP        | 0.37 | -1.44 | 0.00 |
| ENSG00000166025 | AMOTL1      | 0.41 | -1.30 | 0.00 |



|                 |           |      |       |      |
|-----------------|-----------|------|-------|------|
| ENSG00000261115 | TMEM178B  | 0.37 | -1.44 | 0.00 |
| ENSG00000243649 | CFB       | 0.41 | -1.28 | 0.00 |
| ENSG00000157483 | MYO1E     | 0.44 | -1.20 | 0.00 |
| ENSG00000125848 | FLRT3     | 0.11 | -3.19 | 0.00 |
| ENSG00000186340 | THBS2     | 0.44 | -1.18 | 0.00 |
| ENSG00000131941 | RHPN2     | 0.38 | -1.41 | 0.00 |
| ENSG00000115306 | SPTBN1    | 0.52 | -0.94 | 0.00 |
| ENSG00000157110 | RBPMS     | 0.44 | -1.19 | 0.00 |
| ENSG00000132470 | ITGB4     | 0.19 | -2.40 | 0.00 |
| ENSG00000124564 | SLC17A3   | 0.12 | -3.01 | 0.00 |
| ENSG00000011028 | MRC2      | 0.51 | -0.96 | 0.00 |
| ENSG00000115738 | ID2       | 0.29 | -1.78 | 0.00 |
| ENSG00000117519 | CNN3      | 0.43 | -1.20 | 0.00 |
| ENSG00000107282 | APBA1     | 0.09 | -3.48 | 0.00 |
| ENSG00000147027 | TMEM47    | 0.29 | -1.80 | 0.00 |
| ENSG00000101335 | MYL9      | 0.48 | -1.05 | 0.00 |
| ENSG00000108639 | SYNGR2    | 0.51 | -0.98 | 0.00 |
| ENSG00000100065 | CARD10    | 0.33 | -1.60 | 0.00 |
| ENSG00000101849 | TBL1X     | 0.44 | -1.20 | 0.00 |
| ENSG00000144810 | COL8A1    | 0.27 | -1.89 | 0.00 |
| ENSG00000139998 | RAB15     | 0.27 | -1.89 | 0.00 |
| ENSG00000101654 | RNMT      | 0.42 | -1.24 | 0.00 |
| ENSG00000139734 | DIAPH3    | 0.35 | -1.52 | 0.00 |
| ENSG00000173530 | TNFRSF10D | 0.38 | -1.38 | 0.00 |
| ENSG00000180914 | OXTR      | 0.27 | -1.91 | 0.00 |
| ENSG00000160867 | EGFR4     | 0.42 | -1.26 | 0.00 |
| ENSG00000099194 | SCD       | 0.49 | -1.04 | 0.00 |
| ENSG00000105976 | MET       | 0.49 | -1.02 | 0.00 |
| ENSG00000124006 | OBSL1     | 0.34 | -1.58 | 0.00 |
| ENSG00000134369 | NAV1      | 0.51 | -0.98 | 0.00 |
| ENSG00000261298 | AC122134  | 0.14 | -2.79 | 0.00 |
| ENSG00000117152 | RGS4      | 0.08 | -3.67 | 0.00 |
| ENSG00000159335 | PTMS      | 0.44 | -1.18 | 0.00 |
| ENSG00000152078 | TLCD4     | 0.18 | -2.47 | 0.00 |
| ENSG00000111344 | RASAL1    | 0.11 | -3.22 | 0.00 |
| ENSG00000131094 | C10L1     | 0.26 | -1.94 | 0.00 |
| ENSG00000119403 | PHF19     | 0.46 | -1.13 | 0.00 |
| ENSG00000172915 | NBEA      | 0.28 | -1.83 | 0.00 |
| ENSG00000140416 | TPM1      | 0.40 | -1.34 | 0.00 |
| ENSG00000115419 | GLS       | 0.53 | -0.91 | 0.00 |
| ENSG00000137809 | ITGA11    | 0.13 | -2.94 | 0.00 |
| ENSG00000106688 | SLC1A1    | 0.23 | -2.15 | 0.00 |
| ENSG00000165092 | ALDH1A1   | 0.48 | -1.07 | 0.00 |
| ENSG00000182197 | EXT1      | 0.51 | -0.97 | 0.00 |
| ENSG00000091972 | CD200     | 0.07 | -3.85 | 0.00 |
| ENSG00000206053 | JPT2      | 0.48 | -1.06 | 0.00 |
| ENSG00000127863 | TNFRSF19  | 0.07 | -3.93 | 0.00 |
| ENSG00000162433 | AK4       | 0.42 | -1.26 | 0.00 |
| ENSG00000176842 | IRX5      | 0.26 | -1.96 | 0.00 |
| ENSG00000094916 | CBX5      | 0.52 | -0.93 | 0.00 |
| ENSG00000128973 | CLN6      | 0.47 | -1.08 | 0.00 |
| ENSG00000131018 | SYNE1     | 0.38 | -1.40 | 0.00 |
| ENSG00000137807 | KIF23     | 0.41 | -1.29 | 0.00 |
| ENSG00000164574 | GALNT10   | 0.40 | -1.31 | 0.00 |
| ENSG00000177721 | ANXA2R    | 0.17 | -2.55 | 0.00 |
| ENSG00000137819 | PAOR5     | 0.22 | -2.20 | 0.00 |
| ENSG00000140443 | IGF1R     | 0.48 | -1.07 | 0.00 |
| ENSG00000091136 | LAMB1     | 0.56 | -0.85 | 0.00 |
| ENSG00000137310 | TCF19     | 0.41 | -1.27 | 0.00 |
| ENSG00000162631 | NTNG1     | 0.36 | -1.48 | 0.00 |
| ENSG00000077420 | APBB1IP   | 0.48 | -1.06 | 0.00 |

|                 |          |      |       |      |
|-----------------|----------|------|-------|------|
| ENSG00000112246 | SIM1     | 0.22 | -2.19 | 0.00 |
| ENSG00000018408 | WWTR1    | 0.47 | -1.09 | 0.00 |
| ENSG00000174080 | CTSF     | 0.35 | -1.51 | 0.00 |
| ENSG00000000971 | CFH      | 0.36 | -1.49 | 0.00 |
| ENSG00000186566 | GPATCH8  | 0.45 | -1.16 | 0.00 |
| ENSG00000080493 | SLC4A4   | 0.34 | -1.55 | 0.00 |
| ENSG00000169504 | CLIC4    | 0.52 | -0.93 | 0.00 |
| ENSG00000123080 | CDKN2C   | 0.46 | -1.12 | 0.00 |
| ENSG00000137449 | CPEB2    | 0.35 | -1.51 | 0.00 |
| ENSG00000163762 | TM4SF18  | 0.48 | -1.07 | 0.00 |
| ENSG00000173402 | DAG1     | 0.54 | -0.88 | 0.00 |
| ENSG00000005884 | ITGA3    | 0.56 | -0.83 | 0.00 |
| ENSG00000152894 | PTPRK    | 0.42 | -1.25 | 0.00 |
| ENSG00000092964 | DPYSL2   | 0.51 | -0.97 | 0.00 |
| ENSG00000166448 | TMEM130  | 0.10 | -3.39 | 0.00 |
| ENSG00000114480 | GBE1     | 0.51 | -0.99 | 0.00 |
| ENSG00000167191 | GPRC5B   | 0.41 | -1.29 | 0.00 |
| ENSG00000114346 | ECT2     | 0.46 | -1.13 | 0.00 |
| ENSG00000065328 | MCM10    | 0.44 | -1.19 | 0.00 |
| ENSG00000160094 | ZNF362   | 0.29 | -1.76 | 0.00 |
| ENSG00000145819 | ARHGAP26 | 0.34 | -1.57 | 0.00 |
| ENSG00000156140 | ADAMTS3  | 0.31 | -1.68 | 0.00 |
| ENSG00000008441 | NFIX     | 0.49 | -1.02 | 0.00 |
| ENSG00000114279 | FGF12    | 0.23 | -2.14 | 0.00 |
| ENSG00000134243 | SORT1    | 0.38 | -1.40 | 0.00 |
| ENSG00000040275 | SPDL1    | 0.44 | -1.17 | 0.00 |
| ENSG00000139263 | LRIG3    | 0.38 | -1.39 | 0.00 |
| ENSG00000063180 | CA11     | 0.11 | -3.17 | 0.00 |
| ENSG00000115415 | STAT1    | 0.43 | -1.21 | 0.00 |
| ENSG00000179772 | FOXS1    | 0.05 | -4.32 | 0.00 |
| ENSG00000197444 | OGDHL    | 0.35 | -1.52 | 0.00 |
| ENSG00000182871 | COL18A1  | 0.54 | -0.88 | 0.00 |
| ENSG00000152104 | PTPN14   | 0.57 | -0.81 | 0.00 |
| ENSG00000115252 | PDE1A    | 0.09 | -3.49 | 0.00 |
| ENSG00000115380 | EFEMP1   | 0.28 | -1.86 | 0.00 |
| ENSG00000218336 | TENM3    | 0.39 | -1.37 | 0.00 |
| ENSG00000197457 | STMN3    | 0.16 | -2.64 | 0.00 |
| ENSG00000156218 | ADAMTSL3 | 0.21 | -2.28 | 0.00 |
| ENSG00000143061 | IGSF3    | 0.53 | -0.92 | 0.00 |
| ENSG00000122884 | P4HA1    | 0.51 | -0.96 | 0.00 |
| ENSG00000240694 | PNMA2    | 0.18 | -2.48 | 0.00 |
| ENSG00000114541 | FRMD4B   | 0.16 | -2.63 | 0.00 |
| ENSG00000183856 | IOGAP3   | 0.53 | -0.92 | 0.00 |
| ENSG00000100644 | HIF1A    | 0.51 | -0.96 | 0.00 |
| ENSG00000115414 | FN1      | 0.57 | -0.81 | 0.00 |
| ENSG00000104537 | ANXA13   | 0.03 | -4.97 | 0.00 |
| ENSG00000147862 | NFIB     | 0.47 | -1.10 | 0.00 |
| ENSG00000186185 | KIF18B   | 0.44 | -1.17 | 0.00 |
| ENSG00000241119 | UGT1A9   | 0.26 | -1.94 | 0.00 |
| ENSG00000185104 | FAF1     | 0.49 | -1.04 | 0.00 |
| ENSG00000105429 | MEGF8    | 0.48 | -1.06 | 0.00 |
| ENSG00000154310 | TNIK     | 0.35 | -1.53 | 0.00 |
| ENSG00000188042 | ARL4C    | 0.59 | -0.77 | 0.00 |
| ENSG00000196141 | SPATS2L  | 0.41 | -1.27 | 0.00 |
| ENSG00000104998 | IL27RA   | 0.47 | -1.09 | 0.00 |
| ENSG00000075420 | FNDC3B   | 0.48 | -1.06 | 0.00 |
| ENSG00000178531 | CTXN1    | 0.38 | -1.40 | 0.00 |
| ENSG00000109814 | UGDH     | 0.35 | -1.50 | 0.00 |
| ENSG00000100994 | PYGB     | 0.55 | -0.86 | 0.00 |
| ENSG00000131153 | GINS2    | 0.49 | -1.02 | 0.00 |
| ENSG00000121361 | KCNJ8    | 0.24 | -2.08 | 0.00 |

|                 |          |      |       |      |
|-----------------|----------|------|-------|------|
| ENSG00000151388 | ADAMTS12 | 0.55 | -0.87 | 0.00 |
| ENSG00000167632 | TRAPPC9  | 0.42 | -1.27 | 0.00 |
| ENSG00000116106 | EPHA4    | 0.21 | -2.27 | 0.00 |
| ENSG00000106546 | AHR      | 0.47 | -1.08 | 0.00 |
| ENSG00000079308 | TNS1     | 0.33 | -1.59 | 0.00 |
| ENSG00000237649 | KIFC1    | 0.51 | -0.98 | 0.00 |
| ENSG00000142279 | WTIP     | 0.34 | -1.58 | 0.00 |
| ENSG00000038382 | TRIO     | 0.51 | -0.97 | 0.00 |
| ENSG00000197959 | DNM3     | 0.27 | -1.90 | 0.00 |
| ENSG00000133216 | EPHB2    | 0.59 | -0.76 | 0.00 |
| ENSG00000126878 | AIF1L    | 0.16 | -2.64 | 0.00 |
| ENSG00000162105 | SHANK2   | 0.41 | -1.28 | 0.00 |
| ENSG00000101868 | POLA1    | 0.37 | -1.45 | 0.00 |
| ENSG00000141002 | TCF25    | 0.55 | -0.86 | 0.00 |
| ENSG00000131747 | TOP2A    | 0.48 | -1.07 | 0.00 |
| ENSG00000153048 | CARHSP1  | 0.56 | -0.83 | 0.00 |
| ENSG00000079691 | CARMIL1  | 0.46 | -1.13 | 0.00 |
| ENSG00000162522 | KIAA1522 | 0.48 | -1.05 | 0.00 |
| ENSG00000082438 | COBLL1   | 0.27 | -1.90 | 0.00 |
| ENSG00000166106 | ADAMTS15 | 0.04 | -4.72 | 0.00 |
| ENSG00000104765 | BNIP3L   | 0.55 | -0.85 | 0.00 |
| ENSG00000124171 | PARD6B   | 0.29 | -1.78 | 0.00 |
| ENSG00000066279 | ASPM     | 0.41 | -1.29 | 0.00 |
| ENSG00000151640 | DPYSL4   | 0.20 | -2.30 | 0.00 |
| ENSG00000116237 | ICMT     | 0.57 | -0.81 | 0.00 |
| ENSG00000167930 | FAM234A  | 0.53 | -0.92 | 0.00 |
| ENSG00000164638 | SLC29A4  | 0.25 | -2.02 | 0.00 |
| ENSG00000118762 | PKD2     | 0.51 | -0.98 | 0.00 |
| ENSG00000125966 | MMP24    | 0.33 | -1.59 | 0.00 |
| ENSG00000105767 | CADM4    | 0.20 | -2.32 | 0.00 |
| ENSG00000134333 | LDHA     | 0.62 | -0.68 | 0.00 |
| ENSG00000135476 | ESPL1    | 0.46 | -1.11 | 0.00 |
| ENSG00000186918 | ZNF395   | 0.50 | -1.01 | 0.00 |
| ENSG00000082482 | KCNK2    | 0.14 | -2.82 | 0.00 |
| ENSG00000075711 | DLG1     | 0.49 | -1.04 | 0.00 |
| ENSG00000152256 | PDK1     | 0.46 | -1.13 | 0.00 |
| ENSG00000136636 | KCTD3    | 0.55 | -0.86 | 0.00 |
| ENSG00000163781 | TOPBP1   | 0.54 | -0.90 | 0.00 |
| ENSG00000132561 | MATN2    | 0.30 | -1.76 | 0.00 |
| ENSG00000166589 | CDH16    | 0.15 | -2.72 | 0.00 |
| ENSG00000121152 | NCAPH    | 0.50 | -0.99 | 0.00 |
| ENSG00000183444 | OR7E38P  | 0.15 | -2.78 | 0.00 |
| ENSG00000143228 | NUF2     | 0.43 | -1.22 | 0.00 |
| ENSG00000117724 | CENPF    | 0.46 | -1.14 | 0.00 |
| ENSG00000132182 | NUP210   | 0.54 | -0.90 | 0.00 |
| ENSG00000067167 | TRAM1    | 0.54 | -0.88 | 0.00 |
| ENSG00000171298 | GAA      | 0.52 | -0.95 | 0.00 |
| ENSG00000136156 | ITM2B    | 0.60 | -0.74 | 0.00 |
| ENSG00000134013 | LOXL2    | 0.60 | -0.73 | 0.00 |
| ENSG00000185090 | MANEAL   | 0.27 | -1.88 | 0.00 |
| ENSG00000171791 | BCL2     | 0.17 | -2.59 | 0.00 |
| ENSG00000080986 | NDC80    | 0.43 | -1.21 | 0.00 |
| ENSG00000124568 | SLC17A1  | 0.04 | -4.61 | 0.00 |
| ENSG00000120802 | TMPO     | 0.57 | -0.82 | 0.00 |
| ENSG00000071242 | RPS6KA2  | 0.40 | -1.33 | 0.00 |
| ENSG00000138032 | PPM1B    | 0.47 | -1.09 | 0.00 |
| ENSG00000164050 | PLXNB1   | 0.39 | -1.35 | 0.00 |
| ENSG00000126603 | GLIS2    | 0.49 | -1.02 | 0.00 |
| ENSG00000166224 | SGPL1    | 0.56 | -0.84 | 0.00 |
| ENSG00000130508 | PXDN     | 0.60 | -0.73 | 0.00 |
| ENSG00000166033 | HTRA1    | 0.56 | -0.84 | 0.00 |

|                 |           |      |       |      |
|-----------------|-----------|------|-------|------|
| ENSG00000233237 | LINC00472 | 0.48 | -1.07 | 0.00 |
| ENSG00000134690 | CDCA8     | 0.54 | -0.90 | 0.00 |
| ENSG00000170876 | TMEM43    | 0.57 | -0.81 | 0.00 |
| ENSG00000152527 | PLEKHH2   | 0.22 | -2.18 | 0.00 |
| ENSG00000144554 | FANCD2    | 0.46 | -1.13 | 0.00 |
| ENSG00000154734 | ADAMTS1   | 0.55 | -0.87 | 0.00 |
| ENSG00000165626 | BEND7     | 0.58 | -0.78 | 0.00 |
| ENSG00000205403 | CFI       | 0.16 | -2.63 | 0.00 |
| ENSG00000070159 | PTPN3     | 0.55 | -0.87 | 0.00 |
| ENSG00000183255 | PTTG1IP   | 0.61 | -0.71 | 0.00 |
| ENSG00000104419 | NDRG1     | 0.59 | -0.77 | 0.00 |
| ENSG00000170421 | KRT8      | 0.61 | -0.70 | 0.00 |
| ENSG00000129173 | E2F8      | 0.29 | -1.78 | 0.00 |
| ENSG00000198053 | SIRPA     | 0.57 | -0.81 | 0.00 |
| ENSG00000132849 | PATJ      | 0.41 | -1.29 | 0.00 |
| ENSG00000082497 | SERTAD4   | 0.43 | -1.22 | 0.00 |
| ENSG00000179862 | CITED4    | 0.47 | -1.09 | 0.00 |
| ENSG00000165102 | HGSNAT    | 0.58 | -0.79 | 0.00 |
| ENSG00000196670 | ZFP62     | 0.17 | -2.58 | 0.00 |
| ENSG00000118007 | STAG1     | 0.51 | -0.96 | 0.00 |
| ENSG00000163359 | COL6A3    | 0.52 | -0.93 | 0.00 |
| ENSG00000154175 | ABI3BP    | 0.42 | -1.24 | 0.00 |
| ENSG00000130193 | THEM6     | 0.45 | -1.14 | 0.00 |
| ENSG00000184897 | H1-10     | 0.48 | -1.07 | 0.00 |
| ENSG00000196975 | ANXA4     | 0.61 | -0.71 | 0.00 |
| ENSG00000145715 | RASA1     | 0.54 | -0.88 | 0.00 |
| ENSG00000187634 | SAMD11    | 0.08 | -3.70 | 0.00 |
| ENSG00000170044 | ZPLD1     | 0.13 | -2.96 | 0.00 |
| ENSG00000073350 | LLGL2     | 0.15 | -2.76 | 0.00 |
| ENSG00000172380 | GNG12     | 0.57 | -0.81 | 0.00 |
| ENSG00000110328 | GALNT18   | 0.34 | -1.57 | 0.00 |
| ENSG00000164116 | GUCY1A1   | 0.14 | -2.79 | 0.00 |
| ENSG00000115935 | WIPF1     | 0.48 | -1.06 | 0.00 |
| ENSG00000112984 | KIF20A    | 0.57 | -0.82 | 0.00 |
| ENSG00000235142 | LINC02532 | 0.01 | -7.19 | 0.00 |
| ENSG00000124766 | SOX4      | 0.57 | -0.80 | 0.00 |
| ENSG00000131067 | GGT7      | 0.41 | -1.30 | 0.00 |
| ENSG00000113657 | DPYSL3    | 0.62 | -0.69 | 0.00 |
| ENSG00000175215 | CTDSP2    | 0.62 | -0.69 | 0.00 |
| ENSG00000197249 | SERPINA1  | 0.28 | -1.83 | 0.00 |
| ENSG00000142303 | ADAMTS10  | 0.29 | -1.78 | 0.00 |
| ENSG00000115902 | SLC1A4    | 0.42 | -1.26 | 0.00 |
| ENSG00000137673 | MMP7      | 0.16 | -2.64 | 0.00 |
| ENSG00000076003 | MCM6      | 0.57 | -0.82 | 0.00 |
| ENSG00000205336 | ADGRG1    | 0.39 | -1.34 | 0.00 |
| ENSG00000131981 | LGALS3    | 0.57 | -0.82 | 0.00 |
| ENSG00000275342 | PRAG1     | 0.44 | -1.18 | 0.00 |
| ENSG00000173068 | BNC2      | 0.40 | -1.33 | 0.00 |
| ENSG00000118495 | PLAGL1    | 0.44 | -1.19 | 0.00 |
| ENSG00000058804 | NDC1      | 0.56 | -0.84 | 0.00 |
| ENSG00000108175 | ZMIZ1     | 0.60 | -0.74 | 0.00 |
| ENSG00000173334 | TRIB1     | 0.54 | -0.89 | 0.00 |
| ENSG00000183248 | PRR36     | 0.20 | -2.34 | 0.00 |
| ENSG00000107331 | ABCA2     | 0.52 | -0.93 | 0.00 |
| ENSG00000169432 | SCN9A     | 0.14 | -2.81 | 0.00 |
| ENSG00000100811 | YY1       | 0.58 | -0.79 | 0.00 |
| ENSG00000013619 | MAMLD1    | 0.35 | -1.51 | 0.00 |
| ENSG00000153395 | LPCAT1    | 0.57 | -0.80 | 0.00 |
| ENSG00000197226 | TBC1D9B   | 0.60 | -0.73 | 0.00 |
| ENSG00000163584 | RPL22L1   | 0.44 | -1.18 | 0.00 |
| ENSG00000146477 | SLC22A3   | 0.26 | -1.93 | 0.00 |

|                 |          |      |       |      |
|-----------------|----------|------|-------|------|
| ENSG00000206503 | HLA-A    | 0.56 | -0.83 | 0.00 |
| ENSG00000176171 | BNIP3    | 0.62 | -0.69 | 0.00 |
| ENSG00000132326 | PER2     | 0.34 | -1.55 | 0.00 |
| ENSG00000141959 | PFKL     | 0.57 | -0.81 | 0.00 |
| ENSG00000143653 | SCCPDH   | 0.60 | -0.73 | 0.00 |
| ENSG00000008710 | PKD1     | 0.50 | -0.99 | 0.00 |
| ENSG00000213123 | TCTEX1D2 | 0.29 | -1.77 | 0.00 |
| ENSG00000106012 | IOCE     | 0.34 | -1.58 | 0.00 |
| ENSG00000116044 | NFE2L2   | 0.54 | -0.88 | 0.00 |
| ENSG00000121039 | RDH10    | 0.52 | -0.93 | 0.00 |
| ENSG00000115109 | EPB41L5  | 0.35 | -1.52 | 0.00 |
| ENSG00000182718 | ANXA2    | 0.59 | -0.75 | 0.00 |
| ENSG00000147852 | VLDLR    | 0.47 | -1.09 | 0.00 |
| ENSG00000160299 | PCNT     | 0.53 | -0.91 | 0.00 |
| ENSG00000178401 | DNAJC22  | 0.35 | -1.50 | 0.00 |
| ENSG00000184445 | KNTC1    | 0.47 | -1.08 | 0.00 |
| ENSG00000077684 | JADE1    | 0.47 | -1.09 | 0.00 |
| ENSG00000088325 | TPX2     | 0.63 | -0.67 | 0.00 |
| ENSG00000035403 | VCL      | 0.65 | -0.63 | 0.00 |
| ENSG00000047648 | ARHGAP6  | 0.13 | -2.94 | 0.00 |
| ENSG00000072501 | SMC1A    | 0.63 | -0.67 | 0.00 |
| ENSG00000158856 | DMTN     | 0.58 | -0.79 | 0.00 |
| ENSG00000086758 | HUWE1    | 0.63 | -0.66 | 0.00 |
| ENSG00000157514 | TSC22D3  | 0.48 | -1.05 | 0.00 |
| ENSG00000149503 | INCENP   | 0.55 | -0.87 | 0.00 |
| ENSG00000149571 | KIRREL3  | 0.13 | -2.98 | 0.00 |
| ENSG00000147324 | MFHAS1   | 0.55 | -0.87 | 0.00 |
| ENSG00000184661 | CDCA2    | 0.50 | -1.01 | 0.00 |
| ENSG00000106462 | EZH2     | 0.55 | -0.85 | 0.00 |
| ENSG00000135636 | DYSF     | 0.21 | -2.26 | 0.00 |
| ENSG00000049239 | H6PD     | 0.61 | -0.72 | 0.00 |
| ENSG00000175970 | UNC119B  | 0.61 | -0.71 | 0.00 |
| ENSG00000141858 | SAMD1    | 0.56 | -0.83 | 0.00 |
| ENSG00000198535 | C2CD4A   | 0.01 | -6.69 | 0.00 |
| ENSG00000153721 | CNKSR3   | 0.41 | -1.29 | 0.00 |
| ENSG00000173706 | HEG1     | 0.58 | -0.78 | 0.00 |
| ENSG00000141738 | GRB7     | 0.30 | -1.73 | 0.00 |
| ENSG00000075539 | FRYL     | 0.55 | -0.85 | 0.00 |
| ENSG00000145431 | PDGFC    | 0.52 | -0.94 | 0.00 |
| ENSG00000058091 | CDK14    | 0.47 | -1.08 | 0.00 |
| ENSG00000149591 | TAGLN    | 0.38 | -1.38 | 0.00 |
| ENSG00000101265 | RASSF2   | 0.51 | -0.96 | 0.00 |
| ENSG00000137942 | FNBP1L   | 0.46 | -1.11 | 0.00 |
| ENSG00000236039 | AC019117 | 0.14 | -2.81 | 0.00 |
| ENSG00000143847 | PPFIA4   | 0.22 | -2.18 | 0.00 |
| ENSG00000145687 | SSBP2    | 0.37 | -1.44 | 0.00 |
| ENSG00000177303 | CASKIN2  | 0.49 | -1.02 | 0.00 |
| ENSG00000007968 | E2F2     | 0.31 | -1.70 | 0.00 |
| ENSG00000138448 | ITGAV    | 0.59 | -0.76 | 0.00 |
| ENSG00000133135 | RNF128   | 0.53 | -0.91 | 0.00 |
| ENSG00000170312 | CDK1     | 0.55 | -0.86 | 0.00 |
| ENSG00000168140 | VASN     | 0.43 | -1.21 | 0.00 |
| ENSG00000049130 | KITLG    | 0.41 | -1.30 | 0.00 |
| ENSG00000067606 | PRKCZ    | 0.20 | -2.34 | 0.00 |
| ENSG00000187955 | COL14A1  | 0.33 | -1.58 | 0.00 |
| ENSG00000197157 | SND1     | 0.65 | -0.63 | 0.00 |
| ENSG00000260927 | AC009107 | 0.09 | -3.42 | 0.00 |
| ENSG00000105486 | LIG1     | 0.56 | -0.84 | 0.00 |
| ENSG00000066629 | EML1     | 0.55 | -0.85 | 0.00 |
| ENSG00000146592 | CREB5    | 0.55 | -0.87 | 0.00 |
| ENSG00000162591 | MEGF6    | 0.06 | -4.01 | 0.00 |

|                 |          |      |       |      |
|-----------------|----------|------|-------|------|
| ENSG00000111276 | CDKN1B   | 0.54 | -0.90 | 0.00 |
| ENSG00000100154 | TTC28    | 0.49 | -1.01 | 0.00 |
| ENSG00000087274 | ADD1     | 0.64 | -0.65 | 0.00 |
| ENSG00000180263 | FGD6     | 0.59 | -0.77 | 0.00 |
| ENSG00000187741 | FANCA    | 0.54 | -0.89 | 0.00 |
| ENSG00000174332 | GLIS1    | 0.44 | -1.19 | 0.00 |
| ENSG00000157985 | AGAP1    | 0.60 | -0.75 | 0.00 |
| ENSG00000164128 | NPY1R    | 0.30 | -1.73 | 0.00 |
| ENSG00000108924 | HLF      | 0.36 | -1.48 | 0.00 |
| ENSG00000205542 | TMSB4X   | 0.67 | -0.58 | 0.00 |
| ENSG00000147394 | ZNF185   | 0.34 | -1.57 | 0.00 |
| ENSG00000198589 | LRBA     | 0.57 | -0.80 | 0.00 |
| ENSG00000151474 | FRMD4A   | 0.61 | -0.71 | 0.00 |
| ENSG00000111057 | KRT18    | 0.53 | -0.93 | 0.00 |
| ENSG00000139266 | MARCF9   | 0.30 | -1.72 | 0.00 |
| ENSG00000109107 | ALDOC    | 0.46 | -1.14 | 0.00 |
| ENSG00000108846 | ABCC3    | 0.65 | -0.63 | 0.00 |
| ENSG00000132394 | EEFSEC   | 0.50 | -1.00 | 0.00 |
| ENSG00000185483 | ROR1     | 0.30 | -1.73 | 0.00 |
| ENSG00000173517 | PEAK1    | 0.54 | -0.88 | 0.00 |
| ENSG00000079616 | KIF22    | 0.60 | -0.73 | 0.00 |
| ENSG00000105974 | CAV1     | 0.58 | -0.78 | 0.00 |
| ENSG00000142197 | DOP1B    | 0.61 | -0.71 | 0.00 |
| ENSG00000128272 | ATF4     | 0.57 | -0.81 | 0.00 |
| ENSG00000253729 | PRKDC    | 0.67 | -0.58 | 0.00 |
| ENSG00000160145 | KALRN    | 0.42 | -1.26 | 0.00 |
| ENSG00000166508 | MCM7     | 0.64 | -0.65 | 0.00 |
| ENSG00000177084 | POLE     | 0.55 | -0.85 | 0.00 |
| ENSG00000077063 | CTTNBP2  | 0.27 | -1.91 | 0.00 |
| ENSG00000180340 | FZD2     | 0.61 | -0.71 | 0.00 |
| ENSG00000160949 | TONSL    | 0.57 | -0.80 | 0.00 |
| ENSG00000058056 | USP13    | 0.61 | -0.71 | 0.00 |
| ENSG00000105088 | OLFM2    | 0.23 | -2.10 | 0.00 |
| ENSG00000163683 | SMIM14   | 0.53 | -0.91 | 0.00 |
| ENSG00000143878 | RHOB     | 0.59 | -0.77 | 0.00 |
| ENSG00000066933 | MYO9A    | 0.52 | -0.95 | 0.00 |
| ENSG00000113810 | SMC4     | 0.48 | -1.05 | 0.00 |
| ENSG00000286190 | AC055839 | 0.24 | -2.03 | 0.00 |
| ENSG00000162613 | FUBP1    | 0.62 | -0.68 | 0.00 |
| ENSG00000173875 | ZNF791   | 0.22 | -2.18 | 0.00 |
| ENSG00000075218 | GTSE1    | 0.51 | -0.98 | 0.00 |
| ENSG00000165527 | ARF6     | 0.61 | -0.71 | 0.00 |
| ENSG00000140396 | NCOA2    | 0.56 | -0.84 | 0.00 |
| ENSG00000168778 | TCTN2    | 0.49 | -1.03 | 0.00 |
| ENSG00000178202 | POGLUT3  | 0.55 | -0.85 | 0.00 |
| ENSG00000004660 | CAMKK1   | 0.57 | -0.82 | 0.00 |
| ENSG00000100106 | TRIOBP   | 0.55 | -0.85 | 0.00 |
| ENSG00000141736 | ERBB2    | 0.56 | -0.85 | 0.00 |
| ENSG00000134294 | SLC38A2  | 0.60 | -0.75 | 0.00 |
| ENSG00000156639 | ZFAND3   | 0.59 | -0.76 | 0.00 |
| ENSG00000010803 | SCMH1    | 0.38 | -1.40 | 0.00 |
| ENSG00000168056 | LTBP3    | 0.58 | -0.79 | 0.00 |
| ENSG00000119333 | WDR34    | 0.54 | -0.88 | 0.00 |
| ENSG00000162607 | USP1     | 0.59 | -0.75 | 0.00 |
| ENSG00000143845 | ETNK2    | 0.30 | -1.73 | 0.00 |
| ENSG00000269378 | AC022149 | 0.57 | -0.81 | 0.00 |
| ENSG00000171843 | MLLT3    | 0.48 | -1.05 | 0.00 |
| ENSG00000174891 | RSRC1    | 0.51 | -0.98 | 0.00 |
| ENSG00000138160 | KIF11    | 0.56 | -0.83 | 0.00 |
| ENSG00000109586 | GALNT7   | 0.57 | -0.82 | 0.00 |
| ENSG00000224389 | C4B      | 0.10 | -3.36 | 0.00 |

|                 |           |      |        |      |
|-----------------|-----------|------|--------|------|
| ENSG00000163535 | SGO2      | 0.41 | -1.30  | 0.00 |
| ENSG00000154080 | CHST9     | 0.23 | -2.09  | 0.00 |
| ENSG00000132549 | VPS13B    | 0.53 | -0.91  | 0.00 |
| ENSG00000234912 | SNHG20    | 0.40 | -1.33  | 0.00 |
| ENSG00000146648 | EGFR      | 0.66 | -0.59  | 0.00 |
| ENSG00000101935 | AMMECR1   | 0.61 | -0.72  | 0.00 |
| ENSG00000113721 | PDGFRB    | 0.43 | -1.20  | 0.00 |
| ENSG00000258947 | TUBB3     | 0.59 | -0.77  | 0.00 |
| ENSG00000158352 | SHROOM4   | 0.42 | -1.24  | 0.00 |
| ENSG00000135862 | LAMC1     | 0.69 | -0.54  | 0.00 |
| ENSG00000182132 | KCNIP1    | 0.10 | -3.37  | 0.00 |
| ENSG00000171564 | FGB       | 0.00 | -12.56 | 0.00 |
| ENSG00000054277 | OPN3      | 0.46 | -1.13  | 0.00 |
| ENSG00000171388 | APLN      | 0.09 | -3.41  | 0.00 |
| ENSG00000146670 | CDCA5     | 0.61 | -0.71  | 0.00 |
| ENSG00000187720 | THSD4     | 0.52 | -0.93  | 0.00 |
| ENSG00000181894 | ZNF329    | 0.27 | -1.90  | 0.00 |
| ENSG00000106714 | CNTNAP3   | 0.20 | -2.36  | 0.00 |
| ENSG00000172716 | SLFN11    | 0.61 | -0.70  | 0.00 |
| ENSG00000118263 | KLF7      | 0.52 | -0.94  | 0.00 |
| ENSG00000154839 | SKA1      | 0.34 | -1.57  | 0.00 |
| ENSG00000163808 | KIF15     | 0.34 | -1.57  | 0.00 |
| ENSG00000165304 | MELK      | 0.54 | -0.88  | 0.00 |
| ENSG00000175643 | RMI2      | 0.48 | -1.05  | 0.00 |
| ENSG00000253661 | ZFHX4-AS1 | 0.20 | -2.30  | 0.00 |
| ENSG00000159788 | RGS12     | 0.55 | -0.87  | 0.00 |
| ENSG00000074054 | CLASP1    | 0.61 | -0.71  | 0.00 |
| ENSG00000177030 | DEAF1     | 0.56 | -0.83  | 0.00 |
| ENSG00000118523 | CCN2      | 0.57 | -0.81  | 0.00 |
| ENSG00000196230 | TUBB      | 0.68 | -0.56  | 0.00 |
| ENSG00000123095 | BHLHE41   | 0.60 | -0.74  | 0.00 |
| ENSG00000154978 | VOPP1     | 0.56 | -0.84  | 0.00 |
| ENSG00000069275 | NUCKS1    | 0.67 | -0.58  | 0.00 |
| ENSG00000182010 | RTKN2     | 0.24 | -2.04  | 0.00 |
| ENSG00000285417 | BX571818  | 0.58 | -0.79  | 0.00 |
| ENSG00000141298 | SSH2      | 0.48 | -1.05  | 0.00 |
| ENSG00000076382 | SPAG5     | 0.60 | -0.74  | 0.00 |
| ENSG00000167972 | ABCA3     | 0.18 | -2.44  | 0.00 |
| ENSG00000073921 | PICALM    | 0.57 | -0.80  | 0.00 |
| ENSG00000109084 | TMEM97    | 0.59 | -0.77  | 0.00 |
| ENSG00000213853 | EMP2      | 0.41 | -1.28  | 0.00 |
| ENSG00000110917 | MLEC      | 0.69 | -0.53  | 0.00 |
| ENSG00000172037 | LAMB2     | 0.60 | -0.74  | 0.00 |
| ENSG00000120875 | DUSP4     | 0.55 | -0.85  | 0.00 |
| ENSG00000167601 | AXL       | 0.66 | -0.59  | 0.00 |
| ENSG00000088812 | ATRN      | 0.62 | -0.68  | 0.00 |
| ENSG00000085999 | RAD54L    | 0.46 | -1.13  | 0.00 |
| ENSG00000214517 | PPME1     | 0.57 | -0.82  | 0.00 |
| ENSG00000114554 | PLXNA1    | 0.65 | -0.62  | 0.00 |
| ENSG00000233491 | AC008163  | 0.12 | -3.08  | 0.00 |
| ENSG00000038945 | MSR1      | 0.34 | -1.55  | 0.00 |
| ENSG00000168575 | SLC20A2   | 0.55 | -0.87  | 0.00 |
| ENSG00000158195 | WASF2     | 0.66 | -0.59  | 0.00 |
| ENSG00000182481 | KPNA2     | 0.69 | -0.53  | 0.00 |
| ENSG00000101447 | FAM83D    | 0.55 | -0.85  | 0.00 |
| ENSG00000122863 | CHST3     | 0.64 | -0.65  | 0.00 |
| ENSG00000258586 | LINC02274 | 0.36 | -1.49  | 0.00 |
| ENSG00000080345 | RIF1      | 0.52 | -0.95  | 0.00 |
| ENSG00000123684 | LPGAT1    | 0.66 | -0.60  | 0.00 |
| ENSG00000104324 | CPO       | 0.52 | -0.95  | 0.00 |
| ENSG00000118407 | FILIP1    | 0.13 | -2.90  | 0.00 |



|                 |           |      |       |      |
|-----------------|-----------|------|-------|------|
| ENSG00000109805 | NCAPG     | 0.53 | -0.92 | 0.00 |
| ENSG00000185585 | OLFML2A   | 0.43 | -1.20 | 0.00 |
| ENSG00000148848 | ADAM12    | 0.52 | -0.93 | 0.00 |
| ENSG00000071894 | CPSF1     | 0.63 | -0.67 | 0.00 |
| ENSG00000116127 | ALMS1     | 0.44 | -1.20 | 0.00 |
| ENSG00000179403 | VWA1      | 0.40 | -1.33 | 0.00 |
| ENSG00000227766 | AL671277  | 0.59 | -0.77 | 0.00 |
| ENSG00000116791 | CRYZ      | 0.59 | -0.75 | 0.00 |
| ENSG00000176890 | TYMS      | 0.53 | -0.91 | 0.00 |
| ENSG00000019485 | PRDM11    | 0.56 | -0.84 | 0.00 |
| ENSG00000162063 | CCNF      | 0.59 | -0.76 | 0.00 |
| ENSG00000162636 | FAM102B   | 0.42 | -1.26 | 0.00 |
| ENSG00000090889 | KIF4A     | 0.65 | -0.63 | 0.00 |
| ENSG00000165868 | HSPA12A   | 0.58 | -0.79 | 0.00 |
| ENSG00000115464 | USP34     | 0.56 | -0.83 | 0.00 |
| ENSG00000105971 | CAV2      | 0.66 | -0.60 | 0.00 |
| ENSG00000231991 | ANXA2P2   | 0.56 | -0.83 | 0.00 |
| ENSG00000131558 | EXOC4     | 0.65 | -0.61 | 0.00 |
| ENSG00000072071 | ADGRL1    | 0.29 | -1.81 | 0.00 |
| ENSG00000254300 | LINC01111 | 0.08 | -3.63 | 0.00 |
| ENSG00000112624 | BICRAL    | 0.53 | -0.92 | 0.00 |
| ENSG00000138604 | GLCE      | 0.46 | -1.11 | 0.00 |
| ENSG00000101003 | GINS1     | 0.55 | -0.87 | 0.00 |
| ENSG00000021300 | PLEKHB1   | 0.34 | -1.58 | 0.00 |
| ENSG00000185697 | MYBL1     | 0.44 | -1.19 | 0.00 |
| ENSG00000111371 | SLC38A1   | 0.68 | -0.56 | 0.00 |
| ENSG00000234745 | HLA-B     | 0.55 | -0.85 | 0.00 |
| ENSG00000188157 | AGRN      | 0.65 | -0.63 | 0.00 |
| ENSG00000075275 | CELSR1    | 0.61 | -0.72 | 0.00 |
| ENSG00000154127 | UBASH3B   | 0.66 | -0.60 | 0.00 |
| ENSG00000140534 | TICRR     | 0.48 | -1.05 | 0.00 |
| ENSG00000104738 | MCM4      | 0.66 | -0.61 | 0.00 |
| ENSG00000144824 | PHLDB2    | 0.51 | -0.99 | 0.00 |
| ENSG00000107863 | ARHGAP21  | 0.65 | -0.62 | 0.00 |
| ENSG00000150093 | ITGB1     | 0.60 | -0.74 | 0.00 |
| ENSG00000144218 | AFF3      | 0.58 | -0.78 | 0.00 |
| ENSG00000214944 | ARHGEF28  | 0.60 | -0.74 | 0.00 |
| ENSG00000055609 | KMT2C     | 0.62 | -0.68 | 0.00 |
| ENSG00000100557 | CCDC198   | 0.44 | -1.20 | 0.00 |
| ENSG00000118922 | KLF12     | 0.37 | -1.44 | 0.00 |
| ENSG00000176692 | FOXC2     | 0.44 | -1.18 | 0.00 |
| ENSG00000196526 | AFAP1     | 0.61 | -0.72 | 0.00 |
| ENSG00000180815 | MAP3K15   | 0.40 | -1.32 | 0.00 |
| ENSG00000166483 | WEE1      | 0.57 | -0.80 | 0.00 |
| ENSG00000140525 | FANCI     | 0.57 | -0.81 | 0.00 |
| ENSG00000122966 | CIT       | 0.58 | -0.78 | 0.00 |
| ENSG00000143815 | LBR       | 0.65 | -0.61 | 0.00 |
| ENSG00000156802 | ATAD2     | 0.53 | -0.93 | 0.00 |
| ENSG00000092470 | WDR76     | 0.46 | -1.13 | 0.00 |
| ENSG00000139174 | PRICKLE1  | 0.38 | -1.40 | 0.00 |
| ENSG00000118785 | SPP1      | 0.66 | -0.60 | 0.00 |
| ENSG00000125457 | MIF4GD    | 0.48 | -1.06 | 0.00 |
| ENSG00000102189 | EEA1      | 0.54 | -0.90 | 0.00 |
| ENSG00000143248 | RGS5      | 0.33 | -1.62 | 0.00 |
| ENSG00000152253 | SPC25     | 0.54 | -0.90 | 0.00 |
| ENSG00000198838 | RYR3      | 0.22 | -2.19 | 0.00 |
| ENSG00000109794 | FAM149A   | 0.37 | -1.45 | 0.00 |
| ENSG00000124225 | PMEPA1    | 0.64 | -0.64 | 0.00 |
| ENSG00000120685 | PROSER1   | 0.57 | -0.82 | 0.00 |
| ENSG00000285155 | AC092153  | 0.08 | -3.69 | 0.00 |
| ENSG00000141562 | NARF      | 0.63 | -0.66 | 0.00 |

|                 |          |      |       |      |
|-----------------|----------|------|-------|------|
| ENSG00000175567 | UCP2     | 0.44 | -1.18 | 0.00 |
| ENSG00000115310 | RTN4     | 0.71 | -0.50 | 0.00 |
| ENSG00000123989 | CHPF     | 0.61 | -0.72 | 0.00 |
| ENSG00000258366 | RTEL1    | 0.52 | -0.95 | 0.00 |
| ENSG00000137845 | ADAM10   | 0.63 | -0.66 | 0.00 |
| ENSG00000184985 | SORCS2   | 0.58 | -0.78 | 0.00 |
| ENSG00000142599 | RERE     | 0.65 | -0.63 | 0.00 |
| ENSG00000011426 | ANLN     | 0.58 | -0.79 | 0.00 |
| ENSG00000156970 | BUB1B    | 0.59 | -0.76 | 0.00 |
| ENSG00000130827 | PLXNA3   | 0.47 | -1.09 | 0.00 |
| ENSG00000157800 | SLC37A3  | 0.49 | -1.04 | 0.00 |
| ENSG00000168610 | STAT3    | 0.67 | -0.59 | 0.00 |
| ENSG00000174827 | PDZK1    | 0.19 | -2.37 | 0.00 |
| ENSG00000092853 | CLSPN    | 0.55 | -0.87 | 0.00 |
| ENSG00000286070 | AP000356 | 0.01 | -6.42 | 0.00 |
| ENSG00000104341 | LAPTM4B  | 0.71 | -0.50 | 0.00 |
| ENSG00000119280 | Clorf198 | 0.60 | -0.73 | 0.00 |
| ENSG00000144455 | SUMF1    | 0.44 | -1.17 | 0.00 |
| ENSG00000248098 | BCKDHA   | 0.60 | -0.74 | 0.00 |
| ENSG00000163412 | EIF4E3   | 0.21 | -2.22 | 0.00 |
| ENSG00000159216 | RUNX1    | 0.52 | -0.94 | 0.00 |
| ENSG00000168300 | PCMTD1   | 0.48 | -1.07 | 0.00 |
| ENSG00000072134 | EPN2     | 0.50 | -1.00 | 0.00 |
| ENSG00000134198 | TSPAN2   | 0.24 | -2.04 | 0.00 |
| ENSG00000073849 | ST6GAL1  | 0.48 | -1.07 | 0.00 |
| ENSG00000187134 | AKR1C1   | 0.62 | -0.70 | 0.00 |
| ENSG00000153904 | DDAH1    | 0.36 | -1.47 | 0.00 |
| ENSG00000168096 | ANKS3    | 0.56 | -0.85 | 0.00 |
| ENSG00000113441 | LNPEP    | 0.65 | -0.62 | 0.00 |
| ENSG00000171435 | KSR2     | 0.20 | -2.34 | 0.00 |
| ENSG00000047410 | TPR      | 0.62 | -0.68 | 0.00 |
| ENSG00000131378 | RFTN1    | 0.52 | -0.95 | 0.00 |
| ENSG00000184374 | COLEC10  | 0.59 | -0.75 | 0.00 |
| ENSG00000163625 | WDFY3    | 0.55 | -0.85 | 0.00 |
| ENSG00000171848 | RRM2     | 0.66 | -0.59 | 0.00 |
| ENSG00000171603 | CLSTN1   | 0.66 | -0.60 | 0.00 |
| ENSG00000181104 | F2R      | 0.58 | -0.79 | 0.00 |
| ENSG00000105810 | CDK6     | 0.60 | -0.74 | 0.00 |
| ENSG00000112759 | SLC29A1  | 0.52 | -0.95 | 0.00 |
| ENSG00000100228 | RAB36    | 0.51 | -0.97 | 0.00 |
| ENSG00000131779 | PEX11B   | 0.58 | -0.79 | 0.00 |
| ENSG00000189060 | H1-0     | 0.55 | -0.85 | 0.00 |
| ENSG00000107679 | PLEKHA1  | 0.59 | -0.76 | 0.00 |
| ENSG00000138182 | KIF20B   | 0.46 | -1.12 | 0.00 |
| ENSG00000137693 | YAP1     | 0.66 | -0.59 | 0.00 |
| ENSG00000172824 | CES4A    | 0.42 | -1.27 | 0.00 |
| ENSG00000182670 | TTC3     | 0.51 | -0.97 | 0.00 |
| ENSG00000174684 | B4GAT1   | 0.59 | -0.76 | 0.00 |
| ENSG00000130270 | ATP8B3   | 0.41 | -1.28 | 0.00 |
| ENSG00000138449 | SLC40A1  | 0.32 | -1.62 | 0.00 |
| ENSG00000174233 | ADCY6    | 0.54 | -0.88 | 0.00 |
| ENSG00000068078 | FGFR3    | 0.31 | -1.69 | 0.00 |
| ENSG00000109686 | SH3D19   | 0.60 | -0.73 | 0.00 |
| ENSG00000135052 | GOLM1    | 0.69 | -0.54 | 0.00 |
| ENSG00000254536 | AL360181 | 0.27 | -1.90 | 0.00 |
| ENSG00000102007 | PLP2     | 0.69 | -0.54 | 0.00 |
| ENSG00000137770 | CTDSPL2  | 0.57 | -0.82 | 0.00 |
| ENSG00000161921 | CXCL16   | 0.25 | -2.00 | 0.00 |
| ENSG00000102384 | CENPI    | 0.53 | -0.91 | 0.00 |
| ENSG00000003436 | TFPI     | 0.64 | -0.66 | 0.00 |
| ENSG00000173852 | DPY19L1  | 0.63 | -0.67 | 0.00 |

|                 |          |      |       |      |
|-----------------|----------|------|-------|------|
| ENSG00000124440 | HIF3A    | 0.37 | -1.44 | 0.00 |
| ENSG00000128951 | DUT      | 0.58 | -0.78 | 0.00 |
| ENSG00000137831 | UACA     | 0.50 | -1.00 | 0.00 |
| ENSG00000153071 | DAB2     | 0.66 | -0.59 | 0.00 |
| ENSG00000130816 | DNMT1    | 0.67 | -0.57 | 0.00 |
| ENSG00000151490 | PTPRO    | 0.33 | -1.59 | 0.00 |
| ENSG00000269556 | TMEM185A | 0.58 | -0.77 | 0.00 |
| ENSG00000100196 | KDELR3   | 0.56 | -0.83 | 0.00 |
| ENSG00000147044 | CASK     | 0.63 | -0.66 | 0.00 |
| ENSG00000145386 | CCNA2    | 0.63 | -0.66 | 0.00 |
| ENSG00000177565 | TBL1XR1  | 0.67 | -0.58 | 0.00 |
| ENSG00000106484 | MEST     | 0.16 | -2.69 | 0.00 |
| ENSG00000151725 | CENPU    | 0.49 | -1.03 | 0.00 |
| ENSG00000143157 | POGK     | 0.68 | -0.55 | 0.00 |
| ENSG00000092621 | PHGDH    | 0.66 | -0.61 | 0.00 |
| ENSG00000177728 | TMEM94   | 0.52 | -0.94 | 0.00 |
| ENSG00000099991 | CABIN1   | 0.60 | -0.74 | 0.00 |
| ENSG00000176834 | VSIG10   | 0.62 | -0.69 | 0.00 |
| ENSG00000175063 | UBE2C    | 0.63 | -0.67 | 0.00 |
| ENSG00000120708 | TGFBI    | 0.62 | -0.70 | 0.00 |
| ENSG00000177181 | RIMKLA   | 0.07 | -3.87 | 0.00 |
| ENSG00000157510 | AFAP1L1  | 0.64 | -0.65 | 0.00 |
| ENSG00000080824 | HSP90AA1 | 0.68 | -0.56 | 0.00 |
| ENSG00000111206 | FOXMI    | 0.69 | -0.54 | 0.00 |
| ENSG00000123815 | COO8B    | 0.55 | -0.85 | 0.00 |
| ENSG00000143776 | CDC42BPA | 0.62 | -0.69 | 0.00 |
| ENSG00000103811 | CTSH     | 0.59 | -0.76 | 0.00 |
| ENSG00000185480 | PARBP    | 0.44 | -1.20 | 0.00 |
| ENSG00000151240 | DIP2C    | 0.61 | -0.70 | 0.00 |
| ENSG00000119242 | CCDC92   | 0.63 | -0.68 | 0.00 |
| ENSG00000188486 | H2AX     | 0.67 | -0.58 | 0.00 |
| ENSG00000071967 | CYBRD1   | 0.64 | -0.64 | 0.00 |
| ENSG00000133315 | MACROD1  | 0.44 | -1.18 | 0.00 |
| ENSG00000144560 | VGLL4    | 0.66 | -0.60 | 0.00 |
| ENSG00000128791 | TWSG1    | 0.67 | -0.57 | 0.00 |
| ENSG00000164741 | DLC1     | 0.62 | -0.70 | 0.00 |
| ENSG00000167165 | UGT1A6   | 0.14 | -2.79 | 0.00 |
| ENSG00000100422 | CERK     | 0.66 | -0.60 | 0.00 |
| ENSG00000081692 | JMID4    | 0.55 | -0.86 | 0.00 |
| ENSG00000017797 | RALBP1   | 0.69 | -0.53 | 0.00 |
| ENSG00000138134 | STAMBPL1 | 0.51 | -0.97 | 0.00 |
| ENSG00000125398 | SOX9     | 0.48 | -1.05 | 0.00 |
| ENSG00000128245 | YWHAH    | 0.70 | -0.52 | 0.00 |
| ENSG00000278259 | MYO19    | 0.66 | -0.60 | 0.00 |
| ENSG00000126787 | DLGAP5   | 0.59 | -0.77 | 0.00 |
| ENSG00000137968 | SLC44A5  | 0.17 | -2.57 | 0.00 |
| ENSG00000117713 | ARID1A   | 0.68 | -0.55 | 0.00 |
| ENSG00000142173 | COL6A2   | 0.67 | -0.57 | 0.00 |
| ENSG00000144724 | PTPRG    | 0.40 | -1.31 | 0.00 |
| ENSG00000138587 | MNS1     | 0.27 | -1.90 | 0.00 |
| ENSG00000125970 | RALY     | 0.67 | -0.58 | 0.00 |
| ENSG00000077585 | GPR137B  | 0.53 | -0.92 | 0.00 |
| ENSG00000139645 | ANKRD52  | 0.64 | -0.64 | 0.00 |
| ENSG00000149929 | HIRIP3   | 0.59 | -0.77 | 0.00 |
| ENSG00000197763 | TXNRD3   | 0.53 | -0.93 | 0.00 |
| ENSG00000173715 | C11orf80 | 0.42 | -1.23 | 0.00 |
| ENSG00000226445 | BX32234  | 0.24 | -2.06 | 0.00 |
| ENSG00000259316 | AC087632 | 0.03 | -5.19 | 0.00 |
| ENSG00000169129 | AFAP1L2  | 0.63 | -0.67 | 0.00 |
| ENSG00000173950 | XXYLT1   | 0.64 | -0.64 | 0.00 |
| ENSG00000154309 | DISP1    | 0.58 | -0.80 | 0.00 |

|                 |           |      |       |      |
|-----------------|-----------|------|-------|------|
| ENSG00000185591 | SP1       | 0.69 | -0.54 | 0.00 |
| ENSG00000147274 | RBMX      | 0.67 | -0.57 | 0.00 |
| ENSG00000125386 | FAM193A   | 0.65 | -0.62 | 0.00 |
| ENSG00000170043 | TRAPPC1   | 0.64 | -0.64 | 0.00 |
| ENSG00000110400 | NECTIN1   | 0.45 | -1.17 | 0.00 |
| ENSG00000104881 | PPP1R13L  | 0.56 | -0.84 | 0.00 |
| ENSG00000049618 | ARID1B    | 0.64 | -0.64 | 0.00 |
| ENSG00000129925 | PGAP6     | 0.65 | -0.62 | 0.00 |
| ENSG00000107140 | TESK1     | 0.59 | -0.76 | 0.00 |
| ENSG00000150760 | DOCK1     | 0.65 | -0.62 | 0.00 |
| ENSG00000173930 | SLCO4C1   | 0.09 | -3.44 | 0.00 |
| ENSG00000090863 | GLG1      | 0.68 | -0.56 | 0.00 |
| ENSG00000110693 | SOX6      | 0.18 | -2.50 | 0.00 |
| ENSG00000091409 | ITGA6     | 0.51 | -0.98 | 0.00 |
| ENSG00000117114 | ADGRL2    | 0.40 | -1.34 | 0.00 |
| ENSG00000111087 | GLI1      | 0.13 | -2.98 | 0.00 |
| ENSG00000197747 | S100A10   | 0.72 | -0.48 | 0.00 |
| ENSG00000156103 | MMP16     | 0.50 | -0.99 | 0.00 |
| ENSG00000251432 | LINC02615 | 0.33 | -1.62 | 0.00 |
| ENSG00000102181 | CD99L2    | 0.67 | -0.57 | 0.00 |
| ENSG00000181555 | SETD2     | 0.62 | -0.69 | 0.00 |
| ENSG00000259768 | AC004943  | 0.52 | -0.93 | 0.00 |
| ENSG00000164849 | GPR146    | 0.31 | -1.67 | 0.00 |
| ENSG00000142871 | CCN1      | 0.59 | -0.76 | 0.00 |
| ENSG00000173230 | GOLGB1    | 0.65 | -0.62 | 0.00 |
| ENSG00000169122 | FAM110B   | 0.12 | -3.04 | 0.00 |
| ENSG00000077782 | FGFR1     | 0.49 | -1.04 | 0.00 |
| ENSG00000169418 | NPR1      | 0.32 | -1.66 | 0.00 |
| ENSG00000101464 | PIGU      | 0.59 | -0.76 | 0.00 |
| ENSG00000112294 | ALDH5A1   | 0.57 | -0.82 | 0.00 |
| ENSG00000138185 | ENTPD1    | 0.17 | -2.57 | 0.00 |
| ENSG00000100767 | PAPLN     | 0.14 | -2.88 | 0.00 |
| ENSG00000173456 | RNF26     | 0.67 | -0.57 | 0.00 |
| ENSG00000100297 | MCM5      | 0.62 | -0.68 | 0.00 |
| ENSG00000026950 | BTN3A1    | 0.54 | -0.90 | 0.00 |
| ENSG00000113269 | RNF130    | 0.64 | -0.64 | 0.00 |
| ENSG00000142733 | MAP3K6    | 0.53 | -0.92 | 0.00 |
| ENSG00000044115 | CTNNA1    | 0.67 | -0.57 | 0.00 |
| ENSG00000117632 | STMN1     | 0.57 | -0.81 | 0.00 |
| ENSG00000143147 | GPR161    | 0.62 | -0.68 | 0.00 |
| ENSG00000103502 | CDIPT     | 0.66 | -0.60 | 0.00 |
| ENSG00000178904 | DPY19L3   | 0.49 | -1.03 | 0.00 |
| ENSG00000138246 | DNAIC13   | 0.66 | -0.59 | 0.00 |
| ENSG00000151276 | MAG11     | 0.53 | -0.91 | 0.00 |
| ENSG00000147162 | OGT       | 0.70 | -0.52 | 0.00 |
| ENSG00000180592 | SKIDA1    | 0.31 | -1.69 | 0.00 |
| ENSG00000162545 | CAMK2N1   | 0.41 | -1.29 | 0.00 |
| ENSG00000128833 | MYO5C     | 0.12 | -3.04 | 0.00 |
| ENSG00000179364 | PACS2     | 0.58 | -0.78 | 0.00 |
| ENSG00000143643 | TTC13     | 0.56 | -0.82 | 0.00 |
| ENSG00000102531 | FNDC3A    | 0.66 | -0.59 | 0.00 |
| ENSG00000154240 | CEP112    | 0.49 | -1.04 | 0.00 |
| ENSG00000137812 | KNL1      | 0.38 | -1.39 | 0.00 |
| ENSG00000137804 | NUSAP1    | 0.62 | -0.68 | 0.00 |
| ENSG00000127415 | IDUA      | 0.50 | -1.00 | 0.00 |
| ENSG00000185347 | TEDC1     | 0.49 | -1.04 | 0.00 |
| ENSG00000117394 | SLC2A1    | 0.54 | -0.90 | 0.00 |
| ENSG00000133812 | SBF2      | 0.59 | -0.77 | 0.00 |
| ENSG00000198914 | POU3F3    | 0.65 | -0.63 | 0.00 |
| ENSG00000197969 | VPS13A    | 0.56 | -0.84 | 0.00 |
| ENSG00000196367 | TRRAP     | 0.69 | -0.53 | 0.00 |

|                 |           |      |        |      |
|-----------------|-----------|------|--------|------|
| ENSG00000104723 | TUSC3     | 0.59 | -0.76  | 0.00 |
| ENSG00000135968 | GCC2      | 0.57 | -0.81  | 0.00 |
| ENSG00000100461 | RBM23     | 0.66 | -0.60  | 0.00 |
| ENSG00000112851 | ERBIN     | 0.64 | -0.63  | 0.00 |
| ENSG00000152795 | HNRNPDL   | 0.72 | -0.48  | 0.00 |
| ENSG00000141027 | NCOR1     | 0.68 | -0.56  | 0.00 |
| ENSG00000136492 | BRIP1     | 0.43 | -1.22  | 0.00 |
| ENSG00000138778 | CENPE     | 0.40 | -1.32  | 0.00 |
| ENSG00000185950 | IRS2      | 0.65 | -0.61  | 0.00 |
| ENSG00000179241 | LDLRAD3   | 0.60 | -0.74  | 0.00 |
| ENSG00000150630 | VEGFC     | 0.67 | -0.57  | 0.00 |
| ENSG00000048471 | SNX29     | 0.63 | -0.67  | 0.00 |
| ENSG00000138759 | FRAS1     | 0.33 | -1.59  | 0.00 |
| ENSG00000183049 | CAMK1D    | 0.61 | -0.71  | 0.00 |
| ENSG00000139613 | SMARCC2   | 0.72 | -0.48  | 0.00 |
| ENSG00000215114 | UBXN2B    | 0.65 | -0.63  | 0.00 |
| ENSG00000186871 | ERCC6L    | 0.54 | -0.88  | 0.00 |
| ENSG00000127564 | PKMYT1    | 0.58 | -0.79  | 0.00 |
| ENSG00000111877 | MCM9      | 0.46 | -1.14  | 0.00 |
| ENSG00000164830 | OXR1      | 0.55 | -0.86  | 0.00 |
| ENSG00000125107 | CNOT1     | 0.71 | -0.50  | 0.00 |
| ENSG00000131873 | CHSY1     | 0.67 | -0.59  | 0.00 |
| ENSG00000205476 | CCDC85C   | 0.51 | -0.97  | 0.00 |
| ENSG00000071564 | TCF3      | 0.66 | -0.61  | 0.00 |
| ENSG00000284118 | MIR4707   | 0.00 | -17.49 | 0.00 |
| ENSG00000138079 | SLC3A1    | 0.10 | -3.26  | 0.00 |
| ENSG00000142687 | KIAA0319L | 0.68 | -0.55  | 0.00 |
| ENSG00000121892 | PDS5A     | 0.66 | -0.60  | 0.00 |
| ENSG00000000003 | TSPAN6    | 0.63 | -0.67  | 0.00 |
| ENSG00000128191 | DGCR8     | 0.64 | -0.65  | 0.00 |
| ENSG00000112118 | MCM3      | 0.59 | -0.76  | 0.00 |
| ENSG00000159128 | IFNGR2    | 0.61 | -0.71  | 0.00 |
| ENSG00000256043 | CTSO      | 0.60 | -0.73  | 0.00 |
| ENSG00000077549 | CAPZB     | 0.70 | -0.51  | 0.00 |
| ENSG00000184083 | FAM120C   | 0.47 | -1.09  | 0.00 |
| ENSG00000276107 | AC037198  | 0.00 | -13.70 | 0.00 |
| ENSG00000159403 | C1R       | 0.57 | -0.81  | 0.00 |
| ENSG00000225663 | MCRIP1    | 0.62 | -0.69  | 0.00 |
| ENSG00000100714 | MTHFD1    | 0.71 | -0.49  | 0.00 |
| ENSG00000257923 | CUX1      | 0.69 | -0.53  | 0.00 |
| ENSG00000242110 | AMACR     | 0.55 | -0.86  | 0.00 |
| ENSG00000185909 | KLHDC8B   | 0.45 | -1.15  | 0.00 |
| ENSG00000250899 | AC125807  | 0.53 | -0.90  | 0.00 |
| ENSG00000130024 | PHF10     | 0.57 | -0.82  | 0.00 |
| ENSG00000198901 | PRC1      | 0.71 | -0.50  | 0.00 |
| ENSG00000168785 | TSPAN5    | 0.59 | -0.76  | 0.00 |
| ENSG00000159267 | HLCS      | 0.57 | -0.80  | 0.00 |
| ENSG00000205978 | NYNRIN    | 0.45 | -1.17  | 0.00 |
| ENSG00000091622 | PITPNM3   | 0.50 | -0.99  | 0.00 |
| ENSG00000163485 | ADORA1    | 0.67 | -0.57  | 0.00 |
| ENSG00000170017 | ALCAM     | 0.64 | -0.65  | 0.00 |
| ENSG00000182544 | MESD5     | 0.62 | -0.70  | 0.00 |
| ENSG00000120254 | MTHFD1L   | 0.63 | -0.66  | 0.00 |
| ENSG00000101412 | E2F1      | 0.62 | -0.68  | 0.00 |
| ENSG00000253552 | HOXA-AS2  | 0.42 | -1.24  | 0.00 |
| ENSG00000110108 | TMEM109   | 0.70 | -0.51  | 0.00 |
| ENSG00000276851 | AC002401  | 0.33 | -1.59  | 0.00 |
| ENSG00000105854 | PON2      | 0.67 | -0.58  | 0.00 |
| ENSG00000110987 | BCL7A     | 0.45 | -1.16  | 0.00 |
| ENSG00000134533 | RERG      | 0.13 | -2.96  | 0.00 |
| ENSG00000106804 | C5        | 0.21 | -2.28  | 0.00 |

|                 |            |      |        |      |
|-----------------|------------|------|--------|------|
| ENSG00000135622 | SEMA4F     | 0.44 | -1.18  | 0.00 |
| ENSG00000178409 | BEND3      | 0.45 | -1.14  | 0.00 |
| ENSG00000142945 | KIF2C      | 0.64 | -0.64  | 0.00 |
| ENSG00000116679 | IVNS1ABP   | 0.59 | -0.76  | 0.00 |
| ENSG00000260032 | NORAD      | 0.72 | -0.47  | 0.00 |
| ENSG00000132842 | AP3B1      | 0.67 | -0.58  | 0.00 |
| ENSG00000153956 | CACNA2D1   | 0.57 | -0.82  | 0.00 |
| ENSG00000185650 | ZFP36L1    | 0.72 | -0.47  | 0.00 |
| ENSG00000170558 | CDH2       | 0.58 | -0.78  | 0.00 |
| ENSG00000196411 | EPHB4      | 0.61 | -0.72  | 0.00 |
| ENSG00000087266 | SH3BP2     | 0.69 | -0.54  | 0.00 |
| ENSG00000071282 | LMCD1      | 0.52 | -0.95  | 0.00 |
| ENSG00000204634 | TBC1D8     | 0.53 | -0.90  | 0.00 |
| ENSG00000074047 | GLI2       | 0.42 | -1.26  | 0.00 |
| ENSG00000146247 | PHIP       | 0.60 | -0.75  | 0.00 |
| ENSG00000079246 | XRCC5      | 0.65 | -0.61  | 0.00 |
| ENSG00000047849 | MAP4       | 0.72 | -0.48  | 0.00 |
| ENSG00000151746 | BICD1      | 0.58 | -0.78  | 0.00 |
| ENSG00000104728 | ARHGEF10   | 0.67 | -0.57  | 0.00 |
| ENSG00000116117 | PARD3B     | 0.43 | -1.23  | 0.00 |
| ENSG00000168763 | CNNM3      | 0.61 | -0.71  | 0.00 |
| ENSG00000100596 | SPTLC2     | 0.65 | -0.62  | 0.00 |
| ENSG00000261796 | ISY1-RAB43 | 0.00 | -13.50 | 0.00 |
| ENSG00000151414 | NEK7       | 0.61 | -0.72  | 0.00 |
| ENSG00000198554 | WDHD1      | 0.53 | -0.92  | 0.00 |
| ENSG00000156113 | KCNMA1     | 0.66 | -0.60  | 0.00 |
| ENSG00000170949 | ZNF160     | 0.44 | -1.20  | 0.00 |
| ENSG00000158169 | FANCC      | 0.59 | -0.75  | 0.00 |
| ENSG00000183723 | CMTM4      | 0.45 | -1.16  | 0.00 |
| ENSG00000167670 | CHAF1A     | 0.67 | -0.59  | 0.00 |
| ENSG00000188641 | DPYD       | 0.46 | -1.12  | 0.00 |
| ENSG00000067141 | NEO1       | 0.65 | -0.62  | 0.00 |
| ENSG00000000460 | C1orf112   | 0.62 | -0.69  | 0.00 |
| ENSG00000127328 | RAB3IP     | 0.42 | -1.24  | 0.00 |
| ENSG00000111799 | COL12A1    | 0.46 | -1.11  | 0.00 |
| ENSG00000115461 | IGFBP5     | 0.27 | -1.89  | 0.00 |
| ENSG00000115364 | MRPL19     | 0.53 | -0.91  | 0.00 |
| ENSG00000164761 | TNFRSF11B  | 0.50 | -0.99  | 0.00 |
| ENSG00000281332 | LINC00997  | 0.31 | -1.67  | 0.00 |
| ENSG00000100345 | MYH9       | 0.74 | -0.43  | 0.00 |
| ENSG00000126777 | KTN1       | 0.69 | -0.54  | 0.00 |
| ENSG00000145996 | CDKAL1     | 0.55 | -0.86  | 0.00 |
| ENSG00000278540 | ACACA      | 0.69 | -0.54  | 0.00 |
| ENSG00000184162 | NR2C2AP    | 0.58 | -0.77  | 0.00 |
| ENSG00000158106 | RHPN1      | 0.43 | -1.22  | 0.00 |
| ENSG00000170776 | AKAP13     | 0.70 | -0.51  | 0.00 |
| ENSG00000130768 | SMPDL3B    | 0.47 | -1.10  | 0.00 |
| ENSG00000077514 | POLD3      | 0.66 | -0.60  | 0.00 |
| ENSG00000101680 | LAMA1      | 0.73 | -0.46  | 0.00 |
| ENSG00000115970 | THADA      | 0.66 | -0.61  | 0.00 |
| ENSG00000166783 | MARF1      | 0.68 | -0.55  | 0.00 |
| ENSG00000214193 | SH3D21     | 0.57 | -0.80  | 0.00 |
| ENSG00000159792 | PSKH1      | 0.72 | -0.48  | 0.00 |
| ENSG00000165185 | KIAA1958   | 0.43 | -1.21  | 0.00 |
| ENSG00000112029 | FBXO5      | 0.52 | -0.94  | 0.00 |
| ENSG00000134884 | ARGLU1     | 0.71 | -0.50  | 0.00 |
| ENSG00000189362 | NEMP2      | 0.57 | -0.81  | 0.00 |
| ENSG00000005812 | FBXL3      | 0.63 | -0.67  | 0.00 |
| ENSG00000174483 | BBS1       | 0.47 | -1.09  | 0.00 |
| ENSG00000077232 | DNAJC10    | 0.70 | -0.52  | 0.00 |
| ENSG00000082805 | ERC1       | 0.58 | -0.78  | 0.00 |

|                 |            |      |       |      |
|-----------------|------------|------|-------|------|
| ENSG00000196935 | SRGAP1     | 0.57 | -0.80 | 0.00 |
| ENSG00000132589 | FLOT2      | 0.61 | -0.71 | 0.00 |
| ENSG00000139641 | ESYT1      | 0.74 | -0.43 | 0.00 |
| ENSG00000144283 | PKP4       | 0.65 | -0.62 | 0.00 |
| ENSG00000156398 | SFXN2      | 0.59 | -0.75 | 0.00 |
| ENSG00000141458 | NPC1       | 0.70 | -0.51 | 0.00 |
| ENSG00000189057 | FAM111B    | 0.39 | -1.35 | 0.00 |
| ENSG00000248187 | AC078850   | 0.62 | -0.70 | 0.00 |
| ENSG00000165480 | SKA3       | 0.55 | -0.85 | 0.00 |
| ENSG00000134644 | PUM1       | 0.64 | -0.64 | 0.00 |
| ENSG00000169607 | CKAP2L     | 0.56 | -0.84 | 0.00 |
| ENSG00000140848 | CPNE2      | 0.66 | -0.59 | 0.00 |
| ENSG0000019186  | CYP24A1    | 0.69 | -0.54 | 0.00 |
| ENSG00000163516 | ANKZF1     | 0.64 | -0.64 | 0.00 |
| ENSG00000105426 | PTPRS      | 0.63 | -0.66 | 0.00 |
| ENSG00000181625 | SLX1B      | 0.60 | -0.75 | 0.00 |
| ENSG00000197702 | PARVA      | 0.73 | -0.45 | 0.00 |
| ENSG00000180801 | ARSJ       | 0.62 | -0.68 | 0.00 |
| ENSG00000174428 | GTF2IRD2B  | 0.54 | -0.90 | 0.00 |
| ENSG00000176903 | PNMA1      | 0.71 | -0.50 | 0.00 |
| ENSG00000162714 | ZNF496     | 0.71 | -0.49 | 0.00 |
| ENSG00000141376 | BCAS3      | 0.61 | -0.71 | 0.00 |
| ENSG00000079112 | CDH17      | 0.29 | -1.80 | 0.00 |
| ENSG00000065809 | FAM107B    | 0.56 | -0.83 | 0.00 |
| ENSG00000078674 | PCM1       | 0.58 | -0.80 | 0.00 |
| ENSG00000215252 | GOLGA8B    | 0.64 | -0.64 | 0.00 |
| ENSG00000138796 | HADH       | 0.69 | -0.54 | 0.00 |
| ENSG00000003249 | DBNDD1     | 0.46 | -1.12 | 0.00 |
| ENSG00000111684 | LPCAT3     | 0.57 | -0.80 | 0.00 |
| ENSG00000185499 | MUC1       | 0.27 | -1.86 | 0.00 |
| ENSG0000013810  | TACC3      | 0.59 | -0.77 | 0.00 |
| ENSG00000178764 | ZHX2       | 0.60 | -0.73 | 0.00 |
| ENSG00000112379 | ARFGEF3    | 0.49 | -1.03 | 0.00 |
| ENSG00000139618 | BRCA2      | 0.46 | -1.12 | 0.00 |
| ENSG00000170571 | EMB        | 0.58 | -0.77 | 0.00 |
| ENSG00000152558 | TMEM123    | 0.69 | -0.53 | 0.00 |
| ENSG00000021645 | NRXN3      | 0.02 | -5.44 | 0.00 |
| ENSG00000108784 | NAGLU      | 0.69 | -0.53 | 0.00 |
| ENSG00000146955 | RAB19      | 0.08 | -3.72 | 0.00 |
| ENSG00000067182 | TNFRSF1A   | 0.74 | -0.44 | 0.00 |
| ENSG00000067715 | SYT1       | 0.44 | -1.19 | 0.00 |
| ENSG00000244274 | DBNDD2     | 0.33 | -1.61 | 0.00 |
| ENSG00000170961 | HAS2       | 0.27 | -1.91 | 0.00 |
| ENSG00000161395 | PGAP3      | 0.57 | -0.82 | 0.00 |
| ENSG00000107186 | MPDZ       | 0.65 | -0.61 | 0.00 |
| ENSG00000180011 | ZADH2      | 0.56 | -0.83 | 0.00 |
| ENSG00000134057 | CCNB1      | 0.74 | -0.44 | 0.00 |
| ENSG00000263001 | GTF2I      | 0.64 | -0.65 | 0.00 |
| ENSG00000120837 | NEFYB      | 0.61 | -0.72 | 0.00 |
| ENSG00000102606 | ARHGEF7    | 0.70 | -0.51 | 0.00 |
| ENSG00000112312 | GMNN       | 0.61 | -0.71 | 0.00 |
| ENSG00000276043 | UHRF1      | 0.59 | -0.77 | 0.00 |
| ENSG00000131652 | THOC6      | 0.61 | -0.72 | 0.00 |
| ENSG00000163576 | EFHB       | 0.16 | -2.68 | 0.00 |
| ENSG00000084774 | CAD        | 0.71 | -0.49 | 0.00 |
| ENSG00000158470 | B4GALT5    | 0.73 | -0.45 | 0.00 |
| ENSG00000246859 | STARD4-AS1 | 0.39 | -1.34 | 0.00 |
| ENSG00000094841 | UPRT       | 0.47 | -1.10 | 0.00 |
| ENSG00000151364 | KCTD14     | 0.45 | -1.16 | 0.00 |
| ENSG00000164040 | PGRMC2     | 0.23 | -2.10 | 0.00 |
| ENSG00000031003 | FAM13B     | 0.63 | -0.66 | 0.00 |

|                 |             |      |        |      |
|-----------------|-------------|------|--------|------|
| ENSG00000100302 | RASD2       | 0.05 | -4.30  | 0.00 |
| ENSG00000068024 | HDAC4       | 0.63 | -0.67  | 0.00 |
| ENSG00000165244 | ZNF367      | 0.45 | -1.15  | 0.00 |
| ENSG00000142192 | APP         | 0.71 | -0.50  | 0.00 |
| ENSG00000089006 | SNX5        | 0.71 | -0.49  | 0.00 |
| ENSG00000153086 | ACMSD       | 0.22 | -2.19  | 0.00 |
| ENSG00000133119 | RFC3        | 0.65 | -0.62  | 0.00 |
| ENSG00000141560 | FN3KRP      | 0.71 | -0.49  | 0.00 |
| ENSG00000259976 | AC093010    | 0.50 | -1.01  | 0.00 |
| ENSG00000166897 | ELFN2       | 0.61 | -0.72  | 0.00 |
| ENSG00000072778 | ACADVL      | 0.71 | -0.50  | 0.00 |
| ENSG00000002822 | MAD1L1      | 0.56 | -0.85  | 0.00 |
| ENSG00000137522 | RNF121      | 0.55 | -0.87  | 0.00 |
| ENSG00000196313 | POM121      | 0.73 | -0.45  | 0.00 |
| ENSG00000271383 | NBPF19      | 0.54 | -0.89  | 0.00 |
| ENSG00000103227 | LMF1        | 0.33 | -1.61  | 0.00 |
| ENSG00000175727 | MLXIP       | 0.74 | -0.43  | 0.00 |
| ENSG00000072274 | TFCR        | 0.74 | -0.44  | 0.00 |
| ENSG00000204685 | STARD7-AS1  | 0.33 | -1.61  | 0.00 |
| ENSG00000249115 | HAUS5       | 0.57 | -0.82  | 0.00 |
| ENSG00000072571 | HMMR        | 0.64 | -0.64  | 0.00 |
| ENSG00000172830 | SSH3        | 0.65 | -0.61  | 0.00 |
| ENSG00000133026 | MYH10       | 0.74 | -0.44  | 0.00 |
| ENSG00000167123 | CERCAM      | 0.55 | -0.87  | 0.00 |
| ENSG00000113368 | LMNB1       | 0.57 | -0.81  | 0.00 |
| ENSG00000149218 | ENDOD1      | 0.57 | -0.81  | 0.00 |
| ENSG00000104320 | NBN         | 0.68 | -0.56  | 0.00 |
| ENSG00000187210 | GCNT1       | 0.40 | -1.33  | 0.00 |
| ENSG00000112033 | PPARD       | 0.69 | -0.54  | 0.00 |
| ENSG00000113163 | CERT1       | 0.63 | -0.67  | 0.00 |
| ENSG00000124942 | AHNAK       | 0.66 | -0.61  | 0.00 |
| ENSG00000153317 | ASAP1       | 0.69 | -0.53  | 0.00 |
| ENSG00000106609 | TMEM248     | 0.72 | -0.48  | 0.00 |
| ENSG00000164985 | PSIP1       | 0.68 | -0.55  | 0.00 |
| ENSG00000146918 | NCAPG2      | 0.73 | -0.46  | 0.00 |
| ENSG00000157837 | SPPL3       | 0.68 | -0.56  | 0.00 |
| ENSG00000159433 | STARD9      | 0.56 | -0.83  | 0.00 |
| ENSG00000114631 | PODXL2      | 0.70 | -0.51  | 0.00 |
| ENSG00000170482 | SLC23A1     | 0.30 | -1.76  | 0.00 |
| ENSG00000197299 | BLM         | 0.51 | -0.98  | 0.00 |
| ENSG00000149639 | SOGA1       | 0.72 | -0.47  | 0.00 |
| ENSG00000261051 | AC107021    | 0.13 | -2.93  | 0.00 |
| ENSG00000104267 | CA2         | 0.71 | -0.49  | 0.00 |
| ENSG00000088756 | ARHGAP28    | 0.36 | -1.46  | 0.00 |
| ENSG00000140694 | PARN        | 0.66 | -0.59  | 0.00 |
| ENSG00000138190 | EXOC6       | 0.48 | -1.06  | 0.00 |
| ENSG00000067082 | KLF6        | 0.72 | -0.47  | 0.00 |
| ENSG00000101439 | CST3        | 0.64 | -0.64  | 0.00 |
| ENSG00000134709 | HOOK1       | 0.27 | -1.88  | 0.00 |
| ENSG00000180901 | KCTD2       | 0.68 | -0.55  | 0.00 |
| ENSG00000196968 | FUT11       | 0.57 | -0.82  | 0.00 |
| ENSG00000100201 | DDX17       | 0.76 | -0.39  | 0.00 |
| ENSG00000196584 | XRCC2       | 0.66 | -0.61  | 0.00 |
| ENSG00000154358 | OBSCN       | 0.57 | -0.80  | 0.00 |
| ENSG00000164808 | SPIDR       | 0.63 | -0.67  | 0.00 |
| ENSG00000101199 | AREGAP1     | 0.71 | -0.49  | 0.00 |
| ENSG00000125954 | CHURC1-FNTB | 0.00 | -11.70 | 0.00 |
| ENSG00000069535 | MAOB        | 0.17 | -2.60  | 0.00 |
| ENSG00000227500 | SCAMP4      | 0.56 | -0.83  | 0.00 |
| ENSG00000140839 | CLEC18B     | 0.06 | -3.95  | 0.00 |
| ENSG00000172175 | MALT1       | 0.60 | -0.74  | 0.00 |



|                 |           |      |        |      |
|-----------------|-----------|------|--------|------|
| ENSG00000140743 | CDR2      | 0.66 | -0.59  | 0.00 |
| ENSG00000134352 | IL6ST     | 0.69 | -0.53  | 0.00 |
| ENSG00000154545 | MAGED4    | 0.58 | -0.78  | 0.00 |
| ENSG00000244731 | C4A       | 0.20 | -2.34  | 0.00 |
| ENSG00000103335 | PIEZO1    | 0.68 | -0.56  | 0.00 |
| ENSG00000197905 | TEAD4     | 0.67 | -0.57  | 0.00 |
| ENSG00000141576 | RNF157    | 0.67 | -0.58  | 0.00 |
| ENSG00000137075 | RNF38     | 0.62 | -0.69  | 0.00 |
| ENSG00000165730 | STOX1     | 0.17 | -2.53  | 0.00 |
| ENSG00000044446 | PHKA2     | 0.65 | -0.62  | 0.00 |
| ENSG00000143590 | EFNA3     | 0.38 | -1.41  | 0.00 |
| ENSG00000110719 | TCIRG1    | 0.71 | -0.49  | 0.00 |
| ENSG00000069966 | GNB5      | 0.65 | -0.62  | 0.00 |
| ENSG00000119906 | SLE2      | 0.66 | -0.59  | 0.00 |
| ENSG00000126822 | PLEKHG3   | 0.58 | -0.79  | 0.00 |
| ENSG00000112531 | OKI       | 0.62 | -0.69  | 0.00 |
| ENSG00000119522 | DENND1A   | 0.67 | -0.59  | 0.00 |
| ENSG00000167536 | DHRS13    | 0.53 | -0.92  | 0.00 |
| ENSG00000274070 | CASTOR2   | 0.49 | -1.02  | 0.00 |
| ENSG00000146067 | FAM193B   | 0.62 | -0.68  | 0.00 |
| ENSG00000167513 | CDT1      | 0.65 | -0.62  | 0.00 |
| ENSG00000115073 | ACTR1B    | 0.61 | -0.72  | 0.00 |
| ENSG00000157827 | FMNL2     | 0.72 | -0.48  | 0.00 |
| ENSG00000135423 | GLS2      | 0.01 | -6.44  | 0.00 |
| ENSG00000031823 | RANBP3    | 0.73 | -0.46  | 0.00 |
| ENSG00000070413 | DGCR2     | 0.70 | -0.52  | 0.00 |
| ENSG00000104361 | NIPAL2    | 0.44 | -1.18  | 0.00 |
| ENSG00000235272 | RAMACL    | 0.09 | -3.48  | 0.00 |
| ENSG00000066739 | ATG2B     | 0.59 | -0.75  | 0.00 |
| ENSG00000184640 | SEPTIN9   | 0.73 | -0.46  | 0.00 |
| ENSG00000114670 | NEK11     | 0.45 | -1.14  | 0.00 |
| ENSG00000014138 | POLA2     | 0.67 | -0.58  | 0.00 |
| ENSG00000250634 | LINC01182 | 0.67 | -0.57  | 0.00 |
| ENSG00000155816 | FMN2      | 0.37 | -1.43  | 0.00 |
| ENSG00000069248 | NUP133    | 0.72 | -0.47  | 0.00 |
| ENSG00000081913 | PHLPP1    | 0.58 | -0.80  | 0.00 |
| ENSG00000138639 | ARHGAP24  | 0.46 | -1.13  | 0.00 |
| ENSG00000136861 | CDK5RAP2  | 0.68 | -0.56  | 0.00 |
| ENSG00000163633 | C4orf36   | 0.16 | -2.61  | 0.00 |
| ENSG00000079432 | CIC       | 0.74 | -0.44  | 0.00 |
| ENSG00000092847 | AGO1      | 0.71 | -0.49  | 0.00 |
| ENSG00000143850 | PLEKHA6   | 0.71 | -0.49  | 0.00 |
| ENSG00000143641 | GALNT2    | 0.77 | -0.37  | 0.00 |
| ENSG00000112539 | C6orf118  | 0.00 | -11.35 | 0.00 |
| ENSG00000071655 | MBD3      | 0.71 | -0.50  | 0.00 |
| ENSG00000138606 | SHF       | 0.28 | -1.86  | 0.00 |
| ENSG00000167815 | PRDX2     | 0.58 | -0.79  | 0.00 |
| ENSG00000155974 | GRIP1     | 0.55 | -0.86  | 0.00 |
| ENSG00000185033 | SEMA4B    | 0.64 | -0.64  | 0.00 |
| ENSG00000159140 | SON       | 0.76 | -0.39  | 0.00 |
| ENSG00000213551 | DNAJC9    | 0.70 | -0.52  | 0.00 |
| ENSG00000122952 | ZWINT     | 0.70 | -0.51  | 0.00 |
| ENSG00000141401 | IMPA2     | 0.60 | -0.73  | 0.00 |
| ENSG00000160972 | PPP1R16A  | 0.54 | -0.90  | 0.00 |
| ENSG00000198889 | DCAF12L1  | 0.55 | -0.87  | 0.00 |
| ENSG00000176974 | SHMT1     | 0.65 | -0.62  | 0.00 |
| ENSG00000277209 | RPPH1     | 0.02 | -5.44  | 0.00 |
| ENSG00000145555 | MYO10     | 0.58 | -0.78  | 0.00 |
| ENSG00000138030 | KHK       | 0.34 | -1.56  | 0.00 |
| ENSG00000184602 | SNN       | 0.66 | -0.60  | 0.00 |
| ENSG00000101639 | CEP192    | 0.65 | -0.62  | 0.00 |

|                 |           |      |        |      |
|-----------------|-----------|------|--------|------|
| ENSG00000163918 | RFC4      | 0.60 | -0.74  | 0.00 |
| ENSG00000131351 | HAUS8     | 0.65 | -0.62  | 0.00 |
| ENSG00000170921 | TANC2     | 0.76 | -0.40  | 0.00 |
| ENSG00000136824 | SMC2      | 0.56 | -0.83  | 0.00 |
| ENSG00000167978 | SRRM2     | 0.71 | -0.50  | 0.00 |
| ENSG00000100014 | SPECC1L   | 0.60 | -0.73  | 0.00 |
| ENSG00000166147 | FBN1      | 0.74 | -0.43  | 0.00 |
| ENSG00000145425 | RPS3A     | 0.60 | -0.75  | 0.00 |
| ENSG00000100473 | COCH      | 0.54 | -0.89  | 0.00 |
| ENSG00000170653 | ATF7      | 0.71 | -0.49  | 0.00 |
| ENSG00000133597 | ADCK2     | 0.58 | -0.80  | 0.00 |
| ENSG00000168411 | RFWD3     | 0.70 | -0.52  | 0.00 |
| ENSG00000173218 | VANGL1    | 0.72 | -0.47  | 0.00 |
| ENSG00000183087 | GAS6      | 0.70 | -0.52  | 0.00 |
| ENSG00000167799 | NUDT8     | 0.25 | -2.00  | 0.00 |
| ENSG00000146373 | RNF217    | 0.53 | -0.91  | 0.00 |
| ENSG00000198909 | MAP3K3    | 0.73 | -0.45  | 0.00 |
| ENSG00000112983 | BRD8      | 0.65 | -0.62  | 0.00 |
| ENSG00000186767 | SPIN4     | 0.55 | -0.87  | 0.00 |
| ENSG00000162687 | KCNT2     | 0.39 | -1.34  | 0.00 |
| ENSG00000178999 | AURKB     | 0.66 | -0.59  | 0.00 |
| ENSG00000171467 | ZNF318    | 0.69 | -0.53  | 0.00 |
| ENSG00000204852 | TCTN1     | 0.60 | -0.75  | 0.00 |
| ENSG00000204217 | BMPR2     | 0.69 | -0.54  | 0.00 |
| ENSG00000005483 | KMT2E     | 0.67 | -0.58  | 0.00 |
| ENSG00000155313 | USP25     | 0.58 | -0.78  | 0.00 |
| ENSG00000071539 | TRIP13    | 0.73 | -0.46  | 0.00 |
| ENSG00000163872 | YEATS2    | 0.72 | -0.47  | 0.00 |
| ENSG00000128242 | GAL3ST1   | 0.19 | -2.41  | 0.00 |
| ENSG00000257167 | TMPO-AS1  | 0.41 | -1.29  | 0.00 |
| ENSG00000228594 | FNDC10    | 0.21 | -2.23  | 0.00 |
| ENSG00000138346 | DNA2      | 0.55 | -0.86  | 0.00 |
| ENSG00000132670 | PTPRA     | 0.73 | -0.46  | 0.00 |
| ENSG00000174106 | LEMD3     | 0.64 | -0.64  | 0.00 |
| ENSG00000016082 | ISL1      | 0.43 | -1.23  | 0.00 |
| ENSG00000081052 | COL4A4    | 0.24 | -2.03  | 0.00 |
| ENSG00000197119 | SLC25A29  | 0.67 | -0.58  | 0.00 |
| ENSG00000052126 | PLEKHA5   | 0.60 | -0.74  | 0.00 |
| ENSG00000176678 | FOXL1     | 0.56 | -0.84  | 0.00 |
| ENSG00000149311 | ATM       | 0.62 | -0.68  | 0.00 |
| ENSG00000197296 | FITM2     | 0.57 | -0.81  | 0.00 |
| ENSG00000175216 | CKAP5     | 0.73 | -0.45  | 0.00 |
| ENSG00000154760 | SLFN13    | 0.57 | -0.80  | 0.00 |
| ENSG00000198646 | NCOA6     | 0.74 | -0.44  | 0.00 |
| ENSG00000075240 | GRAMD4    | 0.57 | -0.81  | 0.00 |
| ENSG00000142327 | RNPEPL1   | 0.48 | -1.05  | 0.00 |
| ENSG00000198056 | PRIM1     | 0.59 | -0.77  | 0.00 |
| ENSG00000105875 | WDR91     | 0.61 | -0.72  | 0.00 |
| ENSG00000150347 | ARID5B    | 0.59 | -0.76  | 0.00 |
| ENSG00000111752 | PHC1      | 0.67 | -0.58  | 0.00 |
| ENSG00000170881 | RNF139    | 0.68 | -0.55  | 0.00 |
| ENSG00000109685 | NSD2      | 0.55 | -0.86  | 0.00 |
| ENSG00000276386 | CNTNAP3P2 | 0.17 | -2.57  | 0.00 |
| ENSG00000183722 | LHEPL6    | 0.58 | -0.78  | 0.00 |
| ENSG00000101224 | CDC25B    | 0.53 | -0.92  | 0.00 |
| ENSG00000145623 | OSMR      | 0.77 | -0.37  | 0.00 |
| ENSG00000184304 | PRKD1     | 0.56 | -0.83  | 0.00 |
| ENSG00000104332 | SFRP1     | 0.00 | -10.21 | 0.00 |
| ENSG00000111912 | NCOA7     | 0.55 | -0.87  | 0.00 |
| ENSG00000234184 | LINC01781 | 0.16 | -2.67  | 0.00 |
| ENSG00000243709 | LEFTY1    | 0.00 | -11.51 | 0.00 |

|                 |          |      |        |      |
|-----------------|----------|------|--------|------|
| ENSG0000046653  | GPM6B    | 0.32 | -1.65  | 0.00 |
| ENSG00000177119 | ANO6     | 0.71 | -0.49  | 0.00 |
| ENSG00000137700 | SLC37A4  | 0.55 | -0.87  | 0.00 |
| ENSG00000160932 | LY6E     | 0.64 | -0.64  | 0.00 |
| ENSG00000132478 | UNK      | 0.73 | -0.45  | 0.00 |
| ENSG00000162976 | SLC66A3  | 0.55 | -0.86  | 0.00 |
| ENSG00000126970 | ZC4H2    | 0.59 | -0.77  | 0.00 |
| ENSG00000185275 | CD24P4   | 0.06 | -4.05  | 0.00 |
| ENSG00000175455 | CCDC14   | 0.49 | -1.03  | 0.00 |
| ENSG00000130638 | ATXN10   | 0.75 | -0.42  | 0.00 |
| ENSG0000012504  | NR1H4    | 0.33 | -1.58  | 0.00 |
| ENSG00000133030 | MPRIIP   | 0.73 | -0.45  | 0.00 |
| ENSG00000101236 | RNF24    | 0.58 | -0.79  | 0.00 |
| ENSG00000138092 | CENPO    | 0.52 | -0.93  | 0.00 |
| ENSG00000177469 | CAVIN1   | 0.77 | -0.38  | 0.00 |
| ENSG00000093009 | CDC45    | 0.64 | -0.65  | 0.00 |
| ENSG00000196950 | SLC39A10 | 0.64 | -0.64  | 0.00 |
| ENSG00000171824 | EXOSC10  | 0.75 | -0.42  | 0.00 |
| ENSG00000101057 | MYBL2    | 0.75 | -0.41  | 0.00 |
| ENSG00000198700 | IPO9     | 0.78 | -0.36  | 0.00 |
| ENSG00000100393 | EP300    | 0.72 | -0.48  | 0.00 |
| ENSG00000078018 | MAP2     | 0.42 | -1.25  | 0.00 |
| ENSG00000168916 | ZNF608   | 0.71 | -0.49  | 0.00 |
| ENSG00000169057 | MECP2    | 0.68 | -0.55  | 0.00 |
| ENSG00000108557 | RAI1     | 0.74 | -0.43  | 0.00 |
| ENSG00000065413 | ANKRD44  | 0.32 | -1.66  | 0.00 |
| ENSG00000099381 | SETD1A   | 0.69 | -0.54  | 0.00 |
| ENSG00000182263 | FIGN     | 0.67 | -0.58  | 0.00 |
| ENSG00000169564 | PCBP1    | 0.77 | -0.37  | 0.00 |
| ENSG00000124160 | NCOA5    | 0.71 | -0.49  | 0.00 |
| ENSG00000283809 | AC007326 | 0.00 | -11.56 | 0.00 |
| ENSG00000198920 | KIAA0753 | 0.65 | -0.63  | 0.00 |
| ENSG00000161800 | RACGAP1  | 0.63 | -0.66  | 0.00 |
| ENSG00000143578 | CREB3L4  | 0.55 | -0.87  | 0.00 |
| ENSG00000114698 | PLSCR4   | 0.34 | -1.55  | 0.00 |
| ENSG00000174371 | EXO1     | 0.64 | -0.64  | 0.00 |
| ENSG00000135108 | FBXO21   | 0.62 | -0.69  | 0.00 |
| ENSG00000144730 | IL17RD   | 0.28 | -1.84  | 0.00 |
| ENSG00000122642 | FKBP9    | 0.53 | -0.93  | 0.00 |
| ENSG00000121211 | MND1     | 0.53 | -0.91  | 0.00 |
| ENSG00000149269 | PAK1     | 0.73 | -0.45  | 0.00 |
| ENSG00000170871 | KIAA0232 | 0.70 | -0.51  | 0.00 |
| ENSG00000124098 | FAM210B  | 0.63 | -0.67  | 0.00 |
| ENSG00000134775 | FHOD3    | 0.74 | -0.43  | 0.00 |
| ENSG00000168672 | LRATD2   | 0.62 | -0.70  | 0.00 |
| ENSG00000160948 | VPS28    | 0.69 | -0.53  | 0.00 |
| ENSG00000173473 | SMARCC1  | 0.74 | -0.43  | 0.00 |
| ENSG00000185000 | DGAT1    | 0.57 | -0.80  | 0.00 |
| ENSG00000168014 | C2CD3    | 0.69 | -0.54  | 0.00 |
| ENSG00000003056 | M6PR     | 0.70 | -0.52  | 0.00 |
| ENSG00000135697 | BCO1     | 0.33 | -1.58  | 0.00 |
| ENSG00000237296 | SMG1P1   | 0.62 | -0.70  | 0.00 |
| ENSG00000167325 | RRM1     | 0.76 | -0.41  | 0.00 |
| ENSG00000054965 | FAM168A  | 0.75 | -0.41  | 0.00 |
| ENSG00000163435 | ELF3     | 0.76 | -0.39  | 0.00 |
| ENSG00000143476 | DTL      | 0.66 | -0.59  | 0.00 |
| ENSG00000172197 | MBOAT1   | 0.42 | -1.25  | 0.00 |
| ENSG00000169375 | SIN3A    | 0.74 | -0.44  | 0.00 |
| ENSG00000082512 | TRAF5    | 0.66 | -0.61  | 0.00 |
| ENSG00000165650 | PDZD8    | 0.71 | -0.49  | 0.00 |
| ENSG00000125798 | FOXA2    | 0.18 | -2.49  | 0.00 |

|                 |            |      |       |      |
|-----------------|------------|------|-------|------|
| ENSG00000206127 | GOLGA80    | 0.12 | -3.09 | 0.00 |
| ENSG00000135845 | PIGC       | 0.73 | -0.45 | 0.00 |
| ENSG00000162402 | USP24      | 0.73 | -0.46 | 0.00 |
| ENSG00000092969 | TGFB2      | 0.57 | -0.81 | 0.00 |
| ENSG00000104960 | PTOV1      | 0.71 | -0.48 | 0.00 |
| ENSG00000197321 | SVIL       | 0.77 | -0.39 | 0.00 |
| ENSG00000100726 | TELO2      | 0.70 | -0.51 | 0.00 |
| ENSG00000205835 | GMNC       | 0.08 | -3.60 | 0.00 |
| ENSG00000104067 | TJP1       | 0.69 | -0.53 | 0.00 |
| ENSG00000038295 | TLL1       | 0.04 | -4.55 | 0.00 |
| ENSG00000158163 | DZIP1L     | 0.62 | -0.69 | 0.00 |
| ENSG00000108370 | RGS9       | 0.53 | -0.91 | 0.00 |
| ENSG00000105397 | TYK2       | 0.68 | -0.55 | 0.00 |
| ENSG00000117650 | NEK2       | 0.61 | -0.72 | 0.00 |
| ENSG00000115687 | PASK       | 0.59 | -0.77 | 0.00 |
| ENSG00000163125 | RPRD2      | 0.76 | -0.40 | 0.00 |
| ENSG00000204991 | SPIRE2     | 0.55 | -0.87 | 0.00 |
| ENSG00000152990 | ADGRA3     | 0.74 | -0.43 | 0.00 |
| ENSG00000168496 | FEN1       | 0.73 | -0.44 | 0.00 |
| ENSG00000159692 | CTBP1      | 0.76 | -0.40 | 0.00 |
| ENSG00000130313 | PGLS       | 0.71 | -0.50 | 0.00 |
| ENSG00000111011 | RSRC2      | 0.62 | -0.70 | 0.00 |
| ENSG00000131508 | UBE2D2     | 0.77 | -0.38 | 0.00 |
| ENSG00000138772 | ANXA3      | 0.26 | -1.96 | 0.00 |
| ENSG00000144711 | IOSEC1     | 0.67 | -0.58 | 0.00 |
| ENSG00000126001 | CEP250     | 0.73 | -0.45 | 0.00 |
| ENSG00000168936 | TMEM129    | 0.72 | -0.48 | 0.00 |
| ENSG00000108312 | UBTF       | 0.76 | -0.39 | 0.00 |
| ENSG00000188707 | ZBED6CL    | 0.47 | -1.08 | 0.00 |
| ENSG00000198121 | LPAR1      | 0.55 | -0.87 | 0.00 |
| ENSG00000147799 | ARHGAP39   | 0.61 | -0.70 | 0.00 |
| ENSG00000197694 | SPTAN1     | 0.77 | -0.37 | 0.00 |
| ENSG00000174099 | MSRB3      | 0.70 | -0.52 | 0.00 |
| ENSG00000008382 | MPND       | 0.54 | -0.88 | 0.00 |
| ENSG00000167889 | MGAT5B     | 0.40 | -1.31 | 0.00 |
| ENSG00000015171 | ZMYND11    | 0.48 | -1.04 | 0.00 |
| ENSG00000157870 | PRXL2B     | 0.27 | -1.89 | 0.00 |
| ENSG00000178695 | KCTD12     | 0.67 | -0.57 | 0.00 |
| ENSG00000204406 | MBD5       | 0.56 | -0.84 | 0.00 |
| ENSG00000125885 | MCM8       | 0.65 | -0.62 | 0.00 |
| ENSG00000060237 | WNK1       | 0.71 | -0.50 | 0.00 |
| ENSG00000225614 | ZNF469     | 0.24 | -2.06 | 0.00 |
| ENSG00000177570 | SAMD12     | 0.55 | -0.85 | 0.00 |
| ENSG00000111665 | CDCA3      | 0.65 | -0.62 | 0.00 |
| ENSG00000150403 | TMCO3      | 0.75 | -0.41 | 0.00 |
| ENSG00000096060 | EKBP5      | 0.70 | -0.51 | 0.00 |
| ENSG00000129353 | SLC44A2    | 0.67 | -0.58 | 0.00 |
| ENSG00000054118 | THRAP3     | 0.78 | -0.35 | 0.00 |
| ENSG00000079931 | MOXD1      | 0.71 | -0.49 | 0.00 |
| ENSG00000186187 | ZNRF1      | 0.52 | -0.95 | 0.00 |
| ENSG00000172379 | ARNT2      | 0.20 | -2.29 | 0.00 |
| ENSG00000214425 | LRRRC37A4P | 0.55 | -0.85 | 0.00 |
| ENSG00000132207 | SLX1A      | 0.61 | -0.72 | 0.00 |
| ENSG00000148700 | ADD3       | 0.68 | -0.57 | 0.00 |
| ENSG00000268043 | NBPF12     | 0.67 | -0.57 | 0.00 |
| ENSG00000137834 | SMAD6      | 0.64 | -0.64 | 0.00 |
| ENSG00000196914 | ARHGEF12   | 0.66 | -0.60 | 0.00 |
| ENSG00000138031 | ADCY3      | 0.62 | -0.70 | 0.00 |
| ENSG00000161999 | JMJD8      | 0.72 | -0.48 | 0.00 |
| ENSG00000148773 | MKI67      | 0.54 | -0.90 | 0.00 |
| ENSG00000072864 | NDE1       | 0.66 | -0.61 | 0.00 |

|                 |             |      |        |      |
|-----------------|-------------|------|--------|------|
| ENSG00000074800 | ENO1        | 0.76 | -0.40  | 0.00 |
| ENSG00000122779 | TRIM24      | 0.72 | -0.48  | 0.00 |
| ENSG00000090565 | RAB11FIP3   | 0.74 | -0.44  | 0.00 |
| ENSG00000196547 | MAN2A2      | 0.59 | -0.77  | 0.00 |
| ENSG00000271092 | TLCD4-RWDD3 | 0.00 | -14.17 | 0.00 |
| ENSG00000065060 | UHRF1BP1    | 0.73 | -0.45  | 0.00 |
| ENSG00000126217 | MCF2L       | 0.12 | -3.08  | 0.00 |
| ENSG00000146143 | PRIM2       | 0.68 | -0.55  | 0.00 |
| ENSG00000107554 | DNMBP       | 0.76 | -0.40  | 0.00 |
| ENSG00000080839 | RBL1        | 0.64 | -0.64  | 0.00 |
| ENSG00000004799 | PDK4        | 0.36 | -1.46  | 0.00 |
| ENSG00000143442 | POGZ        | 0.69 | -0.53  | 0.00 |
| ENSG00000087903 | RFX2        | 0.49 | -1.02  | 0.00 |
| ENSG00000137135 | ARHGEF39    | 0.55 | -0.87  | 0.00 |
| ENSG00000170915 | PAOR8       | 0.57 | -0.81  | 0.00 |
| ENSG00000198899 | MT-ATP6     | 0.79 | -0.33  | 0.00 |
| ENSG00000257365 | FNTB        | 0.62 | -0.68  | 0.00 |
| ENSG00000152953 | STK32B      | 0.60 | -0.74  | 0.00 |
| ENSG00000100311 | PDGFB       | 0.43 | -1.20  | 0.00 |
| ENSG00000169683 | LRRC45      | 0.70 | -0.52  | 0.00 |
| ENSG00000012660 | ELOVL5      | 0.77 | -0.38  | 0.00 |
| ENSG00000138180 | CEP55       | 0.70 | -0.52  | 0.00 |
| ENSG00000145416 | MARCF1      | 0.39 | -1.35  | 0.00 |
| ENSG00000118193 | KIF14       | 0.59 | -0.75  | 0.00 |
| ENSG00000112655 | PTK7        | 0.68 | -0.56  | 0.00 |
| ENSG00000164142 | FAM160A1    | 0.49 | -1.03  | 0.00 |
| ENSG00000121653 | MAPK8IP1    | 0.51 | -0.97  | 0.00 |
| ENSG00000279041 | AC102945    | 0.46 | -1.13  | 0.00 |
| ENSG00000197858 | GPAA1       | 0.75 | -0.41  | 0.00 |
| ENSG00000116539 | ASH1L       | 0.73 | -0.46  | 0.00 |
| ENSG00000183840 | GPR39       | 0.64 | -0.63  | 0.00 |
| ENSG00000175048 | ZDHHC14     | 0.55 | -0.86  | 0.00 |
| ENSG00000079805 | DNM2        | 0.75 | -0.42  | 0.00 |
| ENSG00000221869 | CEBPD       | 0.75 | -0.41  | 0.00 |
| ENSG00000124207 | CSE1L       | 0.75 | -0.41  | 0.00 |
| ENSG00000072195 | SPEG        | 0.67 | -0.58  | 0.00 |
| ENSG00000109861 | CTSC        | 0.75 | -0.42  | 0.00 |
| ENSG00000115163 | CENPA       | 0.37 | -1.43  | 0.00 |
| ENSG00000237914 | SIRPG-AS1   | 0.25 | -2.01  | 0.00 |
| ENSG00000094631 | HDAC6       | 0.73 | -0.46  | 0.00 |
| ENSG00000177054 | ZDHHC13     | 0.67 | -0.58  | 0.00 |
| ENSG00000166503 | HDGFL3      | 0.68 | -0.56  | 0.00 |
| ENSG00000087111 | PIGS        | 0.77 | -0.39  | 0.00 |
| ENSG00000147130 | ZMYM3       | 0.75 | -0.42  | 0.00 |
| ENSG00000166971 | AKTIP       | 0.59 | -0.76  | 0.00 |
| ENSG00000119772 | DNMT3A      | 0.68 | -0.55  | 0.00 |
| ENSG00000213648 | SULT1A4     | 0.37 | -1.44  | 0.00 |
| ENSG00000177990 | DPY19L2     | 0.44 | -1.19  | 0.00 |
| ENSG00000171320 | ESCO2       | 0.54 | -0.88  | 0.00 |
| ENSG00000136044 | APPL2       | 0.64 | -0.65  | 0.00 |
| ENSG00000197746 | PSAP        | 0.80 | -0.32  | 0.00 |
| ENSG00000204525 | HLA-C       | 0.59 | -0.76  | 0.00 |
| ENSG00000118217 | ATF6        | 0.76 | -0.40  | 0.00 |
| ENSG00000213672 | NCKIPSD     | 0.69 | -0.53  | 0.00 |
| ENSG00000025770 | NCAPH2      | 0.70 | -0.51  | 0.00 |
| ENSG00000070950 | RAD18       | 0.57 | -0.80  | 0.00 |
| ENSG00000112343 | TRIM38      | 0.76 | -0.40  | 0.00 |
| ENSG00000114861 | FOXP1       | 0.61 | -0.71  | 0.00 |
| ENSG00000134247 | PTGFRN      | 0.79 | -0.34  | 0.00 |
| ENSG00000180730 | SHISA2      | 0.78 | -0.35  | 0.00 |
| ENSG00000171105 | INSR        | 0.17 | -2.60  | 0.00 |

|                 |           |      |       |      |
|-----------------|-----------|------|-------|------|
| ENSG00000184220 | CMSS1     | 0.74 | -0.44 | 0.00 |
| ENSG00000170500 | LONRF2    | 0.68 | -0.56 | 0.00 |
| ENSG00000104472 | CHRA1     | 0.65 | -0.62 | 0.00 |
| ENSG00000165392 | WRN       | 0.55 | -0.86 | 0.00 |
| ENSG00000119900 | OGFRL1    | 0.74 | -0.43 | 0.00 |
| ENSG00000135749 | PCNX2     | 0.67 | -0.58 | 0.00 |
| ENSG00000198932 | GPRASP1   | 0.12 | -3.08 | 0.00 |
| ENSG00000106351 | AGFG2     | 0.60 | -0.75 | 0.00 |
| ENSG00000266074 | BAHCC1    | 0.61 | -0.72 | 0.00 |
| ENSG00000102981 | PAR6A     | 0.20 | -2.32 | 0.00 |
| ENSG00000160298 | C21orf58  | 0.43 | -1.20 | 0.00 |
| ENSG00000228262 | LINC01320 | 0.10 | -3.27 | 0.00 |
| ENSG00000070669 | ASNS      | 0.72 | -0.48 | 0.00 |
| ENSG00000010292 | NCAPD2    | 0.74 | -0.43 | 0.00 |
| ENSG00000235092 | ID2-AS1   | 0.41 | -1.30 | 0.00 |
| ENSG00000177706 | FAM20C    | 0.29 | -1.79 | 0.00 |
| ENSG00000123473 | STIL      | 0.59 | -0.75 | 0.00 |
| ENSG00000141258 | SGSM2     | 0.74 | -0.44 | 0.00 |
| ENSG00000111674 | ENO2      | 0.71 | -0.50 | 0.00 |
| ENSG00000181938 | GINS3     | 0.62 | -0.70 | 0.00 |
| ENSG00000166484 | MAPK7     | 0.59 | -0.76 | 0.00 |
| ENSG00000100242 | SUN2      | 0.56 | -0.84 | 0.00 |
| ENSG00000163075 | CFAP221   | 0.27 | -1.87 | 0.00 |
| ENSG00000180357 | ZNF609    | 0.77 | -0.39 | 0.00 |
| ENSG00000138756 | BMP2K     | 0.71 | -0.50 | 0.00 |
| ENSG00000174373 | RALGAPA1  | 0.51 | -0.98 | 0.00 |
| ENSG00000143819 | EPHX1     | 0.76 | -0.40 | 0.00 |
| ENSG00000173273 | TNKS      | 0.75 | -0.41 | 0.00 |
| ENSG00000168792 | ABHD15    | 0.69 | -0.54 | 0.00 |
| ENSG00000080815 | PSEN1     | 0.74 | -0.43 | 0.00 |
| ENSG00000108100 | CCNY      | 0.70 | -0.52 | 0.00 |
| ENSG00000015676 | NUDCD3    | 0.75 | -0.41 | 0.00 |
| ENSG00000124920 | MYRF      | 0.40 | -1.34 | 0.00 |
| ENSG00000001561 | ENPP4     | 0.58 | -0.80 | 0.00 |
| ENSG00000183458 | AC138932  | 0.62 | -0.68 | 0.00 |
| ENSG00000167460 | TPM4      | 0.65 | -0.63 | 0.00 |
| ENSG00000153187 | HNRNPU    | 0.77 | -0.37 | 0.00 |
| ENSG00000163913 | IFT122    | 0.67 | -0.58 | 0.00 |
| ENSG00000186638 | KIF24     | 0.56 | -0.83 | 0.00 |
| ENSG00000089091 | DZANK1    | 0.36 | -1.47 | 0.00 |
| ENSG00000204536 | CCHCR1    | 0.70 | -0.52 | 0.00 |
| ENSG00000185361 | TNFAIP8L1 | 0.69 | -0.54 | 0.00 |
| ENSG00000166881 | NEMP1     | 0.70 | -0.51 | 0.00 |
| ENSG00000171962 | DRC3      | 0.35 | -1.51 | 0.00 |
| ENSG00000133466 | C10TNF6   | 0.63 | -0.66 | 0.00 |
| ENSG00000161618 | ALDH16A1  | 0.69 | -0.54 | 0.00 |
| ENSG00000235333 | PVRIG2P   | 0.44 | -1.19 | 0.00 |
| ENSG00000139718 | SETD1B    | 0.73 | -0.46 | 0.00 |
| ENSG00000142089 | IFITM3    | 0.75 | -0.42 | 0.00 |
| ENSG00000143158 | MPC2      | 0.56 | -0.84 | 0.00 |
| ENSG00000132646 | PCNA      | 0.72 | -0.48 | 0.00 |
| ENSG00000184178 | SCFD2     | 0.69 | -0.54 | 0.00 |
| ENSG00000156052 | GNAO      | 0.73 | -0.45 | 0.00 |
| ENSG00000136485 | DCAF7     | 0.79 | -0.34 | 0.00 |
| ENSG00000091844 | RGS17     | 0.56 | -0.83 | 0.00 |
| ENSG00000168385 | SEPTIN2   | 0.66 | -0.59 | 0.00 |
| ENSG00000156381 | ANKRD9    | 0.54 | -0.89 | 0.00 |
| ENSG00000170214 | ADRA1B    | 0.42 | -1.24 | 0.00 |
| ENSG00000231890 | DARS-AS1  | 0.21 | -2.24 | 0.00 |
| ENSG00000187653 | TMSB4XP8  | 0.64 | -0.65 | 0.00 |
| ENSG00000130635 | COL5A1    | 0.74 | -0.44 | 0.00 |

|                 |            |      |        |      |
|-----------------|------------|------|--------|------|
| ENSG00000135776 | ABCB10     | 0.71 | -0.50  | 0.00 |
| ENSG00000196712 | NF1        | 0.76 | -0.40  | 0.00 |
| ENSG00000171150 | SOCS5      | 0.68 | -0.56  | 0.00 |
| ENSG00000089280 | FUS        | 0.79 | -0.34  | 0.00 |
| ENSG00000225733 | FGD5-AS1   | 0.76 | -0.39  | 0.00 |
| ENSG00000197586 | ENTPD6     | 0.77 | -0.38  | 0.00 |
| ENSG00000167523 | SPATA33    | 0.55 | -0.86  | 0.00 |
| ENSG00000101474 | APMAP      | 0.77 | -0.38  | 0.00 |
| ENSG00000224712 | NPIPA3     | 0.00 | -11.71 | 0.00 |
| ENSG00000115170 | ACVR1      | 0.72 | -0.48  | 0.00 |
| ENSG00000189079 | ARID2      | 0.62 | -0.70  | 0.00 |
| ENSG00000022567 | SLC45A4    | 0.67 | -0.58  | 0.00 |
| ENSG00000057294 | PKP2       | 0.52 | -0.93  | 0.00 |
| ENSG00000246695 | RASSF8-AS1 | 0.54 | -0.88  | 0.00 |
| ENSG00000110321 | EIF4G2     | 0.77 | -0.39  | 0.00 |
| ENSG00000184584 | STING1     | 0.67 | -0.58  | 0.00 |
| ENSG00000279019 | AC009090   | 0.26 | -1.96  | 0.00 |
| ENSG00000177602 | HASPIN     | 0.63 | -0.67  | 0.00 |
| ENSG00000160957 | RECOL4     | 0.67 | -0.58  | 0.00 |
| ENSG00000196663 | TECPR2     | 0.72 | -0.48  | 0.00 |
| ENSG00000105516 | DBP        | 0.47 | -1.09  | 0.00 |
| ENSG00000198363 | ASPH       | 0.77 | -0.37  | 0.00 |
| ENSG00000171889 | MIR31HG    | 0.35 | -1.52  | 0.00 |
| ENSG00000197603 | CPLANE1    | 0.64 | -0.65  | 0.00 |
| ENSG00000206560 | ANKRD28    | 0.63 | -0.67  | 0.00 |
| ENSG00000185324 | CDK10      | 0.64 | -0.63  | 0.00 |
| ENSG00000186260 | MRTFB      | 0.70 | -0.51  | 0.00 |
| ENSG00000115760 | BIRC6      | 0.73 | -0.46  | 0.00 |
| ENSG00000090581 | GNPTG      | 0.73 | -0.46  | 0.00 |
| ENSG00000105085 | MED26      | 0.43 | -1.23  | 0.00 |
| ENSG00000068796 | KIF2A      | 0.73 | -0.46  | 0.00 |
| ENSG00000196821 | ILRUN      | 0.79 | -0.35  | 0.00 |
| ENSG00000260604 | AL590004   | 0.55 | -0.86  | 0.00 |
| ENSG00000152495 | CAMK4      | 0.58 | -0.80  | 0.00 |
| ENSG00000159842 | ABR        | 0.77 | -0.38  | 0.00 |
| ENSG00000239305 | RNF103     | 0.68 | -0.57  | 0.00 |
| ENSG00000176087 | SLC35A4    | 0.77 | -0.37  | 0.00 |
| ENSG00000253187 | HOXA10-AS  | 0.31 | -1.67  | 0.00 |
| ENSG00000112893 | MAN2A1     | 0.69 | -0.53  | 0.00 |
| ENSG00000154920 | EME1       | 0.63 | -0.66  | 0.00 |
| ENSG00000136813 | ECPAS      | 0.77 | -0.38  | 0.00 |
| ENSG00000164010 | ERMAP      | 0.65 | -0.61  | 0.00 |
| ENSG00000150551 | LYPD1      | 0.16 | -2.63  | 0.00 |
| ENSG00000078900 | TP73       | 0.03 | -4.90  | 0.00 |
| ENSG00000144481 | TRPM8      | 0.67 | -0.57  | 0.00 |
| ENSG00000057608 | GDI2       | 0.80 | -0.32  | 0.00 |
| ENSG00000166340 | TPP1       | 0.61 | -0.70  | 0.00 |
| ENSG00000100258 | LMF2       | 0.61 | -0.72  | 0.00 |
| ENSG00000134291 | TMEM106C   | 0.76 | -0.39  | 0.00 |
| ENSG00000165312 | OTUD1      | 0.48 | -1.05  | 0.00 |
| ENSG00000163348 | PYGO2      | 0.76 | -0.39  | 0.00 |
| ENSG00000116670 | MAD2L2     | 0.71 | -0.50  | 0.00 |
| ENSG00000160325 | CACFD1     | 0.55 | -0.87  | 0.00 |
| ENSG00000157445 | CACNA2D3   | 0.43 | -1.22  | 0.00 |
| ENSG00000075151 | EIF4G3     | 0.76 | -0.39  | 0.00 |
| ENSG00000113273 | ARSB       | 0.71 | -0.50  | 0.00 |
| ENSG00000172817 | CYP7B1     | 0.56 | -0.83  | 0.00 |
| ENSG00000153707 | PTPRD      | 0.68 | -0.55  | 0.00 |
| ENSG00000145730 | PAM        | 0.76 | -0.39  | 0.00 |
| ENSG00000065883 | CDK13      | 0.75 | -0.41  | 0.00 |
| ENSG00000146463 | ZMYM4      | 0.76 | -0.40  | 0.00 |

|                 |           |      |        |      |
|-----------------|-----------|------|--------|------|
| ENSG00000183579 | ZNRF3     | 0.59 | -0.75  | 0.00 |
| ENSG00000093167 | LRRFIP2   | 0.67 | -0.57  | 0.00 |
| ENSG00000143614 | GATAD2B   | 0.77 | -0.38  | 0.00 |
| ENSG00000120071 | KANSI1    | 0.71 | -0.49  | 0.00 |
| ENSG00000005339 | CREBBP    | 0.69 | -0.53  | 0.00 |
| ENSG00000034053 | APBA2     | 0.70 | -0.52  | 0.00 |
| ENSG00000172954 | LCLAT1    | 0.61 | -0.71  | 0.00 |
| ENSG00000023697 | DERA      | 0.72 | -0.48  | 0.00 |
| ENSG00000197111 | PCBP2     | 0.70 | -0.52  | 0.00 |
| ENSG00000129667 | RHBDF2    | 0.77 | -0.38  | 0.00 |
| ENSG00000214826 | DDX12P    | 0.54 | -0.90  | 0.00 |
| ENSG00000099331 | MYO9B     | 0.78 | -0.35  | 0.00 |
| ENSG00000046889 | PREX2     | 0.66 | -0.59  | 0.00 |
| ENSG00000118482 | PHF3      | 0.68 | -0.55  | 0.00 |
| ENSG00000158417 | EIF5B     | 0.74 | -0.44  | 0.00 |
| ENSG00000136205 | TNS3      | 0.79 | -0.34  | 0.00 |
| ENSG00000129534 | MIS18BP1  | 0.59 | -0.76  | 0.00 |
| ENSG00000160447 | PKN3      | 0.58 | -0.80  | 0.00 |
| ENSG00000196517 | SLC6A9    | 0.32 | -1.65  | 0.00 |
| ENSG00000111788 | AC009533  | 0.52 | -0.93  | 0.00 |
| ENSG00000247809 | NR2F2-AS1 | 0.38 | -1.38  | 0.00 |
| ENSG00000257103 | LSM14A    | 0.70 | -0.51  | 0.00 |
| ENSG00000179750 | APOBEC3B  | 0.69 | -0.53  | 0.00 |
| ENSG00000126804 | ZBTB1     | 0.58 | -0.79  | 0.00 |
| ENSG00000115290 | GRB14     | 0.64 | -0.64  | 0.00 |
| ENSG00000171723 | GPHN      | 0.61 | -0.71  | 0.00 |
| ENSG00000141497 | ZMYND15   | 0.00 | -10.06 | 0.00 |
| ENSG00000136379 | ABHD17C   | 0.54 | -0.88  | 0.00 |
| ENSG00000091129 | NRCAM     | 0.37 | -1.44  | 0.00 |
| ENSG00000159259 | CHAF1B    | 0.69 | -0.54  | 0.00 |
| ENSG00000106070 | GRB10     | 0.74 | -0.43  | 0.00 |
| ENSG00000135744 | AGT       | 0.17 | -2.59  | 0.00 |
| ENSG00000134318 | ROCK2     | 0.71 | -0.49  | 0.00 |
| ENSG00000089902 | RCOR1     | 0.70 | -0.51  | 0.00 |
| ENSG00000198938 | MT-CO3    | 0.82 | -0.29  | 0.00 |
| ENSG00000121621 | KIF18A    | 0.52 | -0.95  | 0.00 |
| ENSG00000155016 | CYP2U1    | 0.57 | -0.80  | 0.00 |
| ENSG00000112742 | TTK       | 0.50 | -0.99  | 0.00 |
| ENSG00000115904 | SOS1      | 0.73 | -0.45  | 0.00 |
| ENSG00000091583 | APOH      | 0.00 | -11.72 | 0.00 |
| ENSG00000146038 | DCDC2     | 0.38 | -1.39  | 0.00 |
| ENSG00000140451 | PIF1      | 0.51 | -0.97  | 0.00 |
| ENSG00000172292 | CERS6     | 0.73 | -0.45  | 0.00 |
| ENSG00000012232 | EXTL3     | 0.76 | -0.40  | 0.00 |
| ENSG00000181666 | ZNF875    | 0.61 | -0.72  | 0.00 |
| ENSG00000167900 | TK1       | 0.80 | -0.32  | 0.00 |
| ENSG00000169242 | EFNA1     | 0.29 | -1.76  | 0.00 |
| ENSG00000127995 | CASD1     | 0.60 | -0.74  | 0.00 |
| ENSG00000139921 | TMX1      | 0.72 | -0.47  | 0.00 |
| ENSG00000235531 | MSC-AS1   | 0.63 | -0.66  | 0.00 |
| ENSG00000139354 | GAS2L3    | 0.57 | -0.82  | 0.00 |
| ENSG00000109674 | NEIL3     | 0.64 | -0.65  | 0.00 |
| ENSG00000123066 | MED13L    | 0.67 | -0.58  | 0.00 |
| ENSG00000137404 | NRM       | 0.57 | -0.80  | 0.00 |
| ENSG00000118058 | KMT2A     | 0.74 | -0.43  | 0.00 |
| ENSG00000129636 | ITFG1     | 0.75 | -0.42  | 0.00 |
| ENSG00000113971 | NPHP3     | 0.67 | -0.58  | 0.00 |
| ENSG00000198049 | AVPR1B    | 0.14 | -2.85  | 0.00 |
| ENSG00000198887 | SMC5      | 0.68 | -0.56  | 0.00 |
| ENSG00000105011 | ASF1B     | 0.67 | -0.57  | 0.00 |
| ENSG00000166851 | PLK1      | 0.78 | -0.36  | 0.00 |



|                 |          |      |        |      |
|-----------------|----------|------|--------|------|
| ENSG00000231925 | TAPBP    | 0.75 | -0.42  | 0.00 |
| ENSG00000263535 | AK4P1    | 0.39 | -1.37  | 0.00 |
| ENSG00000168488 | ATXN2L   | 0.79 | -0.34  | 0.00 |
| ENSG00000229656 | ITGB1-DT | 0.72 | -0.47  | 0.00 |
| ENSG00000179820 | MYADM    | 0.66 | -0.59  | 0.00 |
| ENSG00000144036 | EXOC6B   | 0.68 | -0.55  | 0.00 |
| ENSG00000101126 | ADNP     | 0.30 | -1.73  | 0.00 |
| ENSG00000167074 | TEF      | 0.70 | -0.52  | 0.00 |
| ENSG00000197557 | TTC30A   | 0.60 | -0.73  | 0.00 |
| ENSG00000112541 | PDE10A   | 0.64 | -0.65  | 0.00 |
| ENSG00000140575 | IOGAP1   | 0.79 | -0.33  | 0.00 |
| ENSG00000051341 | POLO     | 0.62 | -0.70  | 0.00 |
| ENSG00000160226 | CFAP410  | 0.63 | -0.67  | 0.00 |
| ENSG00000245694 | CRNDE    | 0.54 | -0.90  | 0.00 |
| ENSG00000164111 | ANXA5    | 0.80 | -0.32  | 0.00 |
| ENSG00000115504 | EHBP1    | 0.72 | -0.48  | 0.00 |
| ENSG00000169814 | BTD      | 0.58 | -0.78  | 0.00 |
| ENSG00000126705 | AHDC1    | 0.70 | -0.51  | 0.00 |
| ENSG00000278621 | AC037198 | 0.06 | -4.04  | 0.00 |
| ENSG00000107779 | BMPR1A   | 0.71 | -0.49  | 0.00 |
| ENSG00000137269 | LRRC1    | 0.57 | -0.80  | 0.00 |
| ENSG00000176720 | BOK      | 0.60 | -0.73  | 0.00 |
| ENSG00000184154 | LRTOMT   | 0.58 | -0.78  | 0.00 |
| ENSG00000151690 | MFSD6    | 0.58 | -0.78  | 0.00 |
| ENSG00000004777 | ARHGAP33 | 0.45 | -1.14  | 0.00 |
| ENSG00000188985 | DHFRP1   | 0.69 | -0.54  | 0.00 |
| ENSG00000111801 | BTN3A3   | 0.60 | -0.73  | 0.00 |
| ENSG00000035687 | ADSS2    | 0.77 | -0.38  | 0.00 |
| ENSG00000111859 | NEDD9    | 0.14 | -2.83  | 0.00 |
| ENSG00000152117 | SMPD4BP  | 0.72 | -0.48  | 0.00 |
| ENSG00000096093 | EFHC1    | 0.49 | -1.04  | 0.00 |
| ENSG00000100490 | CDKL1    | 0.42 | -1.25  | 0.00 |
| ENSG00000136816 | TOR1B    | 0.67 | -0.57  | 0.00 |
| ENSG00000186153 | WVOX     | 0.55 | -0.87  | 0.00 |
| ENSG00000137177 | KIF13A   | 0.75 | -0.42  | 0.00 |
| ENSG00000196814 | MVB12B   | 0.59 | -0.76  | 0.00 |
| ENSG00000121207 | LRAT     | 0.25 | -1.99  | 0.00 |
| ENSG00000141556 | TBCD     | 0.79 | -0.35  | 0.00 |
| ENSG00000049541 | RFC2     | 0.71 | -0.49  | 0.00 |
| ENSG00000152076 | CCDC74B  | 0.55 | -0.87  | 0.00 |
| ENSG00000110422 | HIPK3    | 0.69 | -0.54  | 0.00 |
| ENSG00000256514 | AP003419 | 0.00 | -12.24 | 0.00 |
| ENSG00000164366 | CCDC127  | 0.75 | -0.41  | 0.00 |
| ENSG00000005810 | MYCBP2   | 0.72 | -0.48  | 0.00 |
| ENSG00000136237 | RAPGEF5  | 0.33 | -1.60  | 0.00 |
| ENSG00000249042 | AC008771 | 0.44 | -1.20  | 0.00 |
| ENSG00000109381 | ELF2     | 0.69 | -0.53  | 0.00 |
| ENSG00000213079 | SCAF8    | 0.72 | -0.47  | 0.00 |
| ENSG00000117523 | PRRC2C   | 0.81 | -0.30  | 0.00 |
| ENSG00000085840 | ORC1     | 0.67 | -0.58  | 0.00 |
| ENSG00000102974 | CTCF     | 0.74 | -0.44  | 0.00 |
| ENSG00000138764 | CCNG2    | 0.72 | -0.47  | 0.00 |
| ENSG00000164880 | INTS1    | 0.78 | -0.35  | 0.00 |
| ENSG00000145241 | CENPC    | 0.56 | -0.83  | 0.00 |
| ENSG00000196924 | FLNA     | 0.79 | -0.34  | 0.00 |
| ENSG00000268120 | AC010336 | 0.00 | -12.33 | 0.00 |
| ENSG00000113594 | LIFR     | 0.65 | -0.63  | 0.00 |
| ENSG00000166780 | BMERB1   | 0.54 | -0.88  | 0.00 |
| ENSG00000204120 | GIGYF2   | 0.78 | -0.36  | 0.00 |
| ENSG00000166734 | GOLM2    | 0.70 | -0.51  | 0.00 |
| ENSG00000248527 | MTATP6P1 | 0.79 | -0.34  | 0.00 |

|                  |            |      |        |      |
|------------------|------------|------|--------|------|
| ENSG00000013374  | NUB1       | 0.75 | -0.41  | 0.00 |
| ENSG000000196739 | COL27A1    | 0.71 | -0.50  | 0.00 |
| ENSG00000093000  | NUP50      | 0.75 | -0.42  | 0.00 |
| ENSG000000198586 | TLK1       | 0.72 | -0.48  | 0.00 |
| ENSG000000197816 | CCDC180    | 0.26 | -1.95  | 0.00 |
| ENSG000000128487 | SPECC1     | 0.70 | -0.51  | 0.00 |
| ENSG00000047578  | KIAA0556   | 0.75 | -0.42  | 0.00 |
| ENSG000000169684 | CHRNA5     | 0.56 | -0.83  | 0.00 |
| ENSG000000171681 | ATF7IP     | 0.74 | -0.43  | 0.00 |
| ENSG00000082196  | C10TNF3    | 0.08 | -3.71  | 0.00 |
| ENSG000000158402 | CDC25C     | 0.60 | -0.73  | 0.00 |
| ENSG00000080200  | CRYBG3     | 0.65 | -0.62  | 0.00 |
| ENSG00000012963  | UBR7       | 0.68 | -0.56  | 0.00 |
| ENSG000000108465 | CDK5RAP3   | 0.65 | -0.61  | 0.00 |
| ENSG000000171914 | TLN2       | 0.69 | -0.53  | 0.00 |
| ENSG000000184634 | MED12      | 0.76 | -0.40  | 0.00 |
| ENSG000000260279 | AC137932   | 0.40 | -1.33  | 0.00 |
| ENSG000000219481 | NBPF1      | 0.76 | -0.39  | 0.00 |
| ENSG000000102595 | UGGT2      | 0.62 | -0.69  | 0.00 |
| ENSG000000166228 | PCBD1      | 0.79 | -0.34  | 0.00 |
| ENSG000000152217 | SETBP1     | 0.52 | -0.95  | 0.00 |
| ENSG000000138468 | SENP7      | 0.52 | -0.95  | 0.00 |
| ENSG000000107290 | SETX       | 0.73 | -0.45  | 0.00 |
| ENSG000000187097 | ENTPD5     | 0.59 | -0.75  | 0.00 |
| ENSG000000187951 | AC091057   | 0.57 | -0.81  | 0.00 |
| ENSG000000112739 | PRPF4B     | 0.73 | -0.45  | 0.00 |
| ENSG000000143153 | ATP1B1     | 0.79 | -0.33  | 0.00 |
| ENSG000000135220 | UGT2A3     | 0.04 | -4.75  | 0.00 |
| ENSG000000143195 | ILDR2      | 0.33 | -1.59  | 0.00 |
| ENSG000000131504 | DIAPH1     | 0.79 | -0.34  | 0.00 |
| ENSG000000114544 | SLC41A3    | 0.69 | -0.53  | 0.00 |
| ENSG000000214367 | HAUS3      | 0.64 | -0.64  | 0.00 |
| ENSG000000125637 | PSD4       | 0.53 | -0.91  | 0.00 |
| ENSG000000133874 | RNF122     | 0.41 | -1.30  | 0.00 |
| ENSG000000224411 | HSP90AA2P  | 0.65 | -0.62  | 0.00 |
| ENSG000000167535 | CACNB3     | 0.41 | -1.28  | 0.00 |
| ENSG000000008869 | HEATR5B    | 0.70 | -0.52  | 0.00 |
| ENSG000000160293 | VAV2       | 0.78 | -0.36  | 0.00 |
| ENSG000000033867 | SLC4A7     | 0.66 | -0.59  | 0.00 |
| ENSG000000136104 | RNASEH2B   | 0.72 | -0.48  | 0.00 |
| ENSG000000147475 | ERLIN2     | 0.78 | -0.35  | 0.00 |
| ENSG000000239264 | TXNDC5     | 0.81 | -0.30  | 0.00 |
| ENSG000000105137 | SYDE1      | 0.75 | -0.41  | 0.00 |
| ENSG000000211592 | IGKC       | 0.00 | -12.60 | 0.00 |
| ENSG000000064999 | ANKS1A     | 0.76 | -0.40  | 0.00 |
| ENSG000000282458 | WASH5P     | 0.26 | -1.94  | 0.00 |
| ENSG000000287263 | AC008875   | 0.59 | -0.75  | 0.00 |
| ENSG000000134480 | CCNH       | 0.67 | -0.59  | 0.00 |
| ENSG000000102287 | GABRE      | 0.67 | -0.57  | 0.00 |
| ENSG000000165282 | PIGO       | 0.66 | -0.60  | 0.00 |
| ENSG000000124193 | SRSF6      | 0.71 | -0.49  | 0.00 |
| ENSG000000160007 | ARHGAP35   | 0.80 | -0.32  | 0.00 |
| ENSG000000105443 | CYTH2      | 0.77 | -0.38  | 0.00 |
| ENSG000000136504 | KAT7       | 0.74 | -0.43  | 0.00 |
| ENSG000000259291 | ZNF710-AS1 | 0.48 | -1.06  | 0.00 |
| ENSG000000115392 | FANCL      | 0.64 | -0.65  | 0.00 |
| ENSG000000123908 | AGO2       | 0.79 | -0.35  | 0.00 |
| ENSG000000162688 | AGL        | 0.62 | -0.69  | 0.00 |
| ENSG000000072310 | SREBF1     | 0.71 | -0.50  | 0.00 |
| ENSG000000185920 | PTCH1      | 0.65 | -0.62  | 0.00 |
| ENSG000000157657 | ZNF618     | 0.45 | -1.15  | 0.00 |

|                 |             |      |       |      |
|-----------------|-------------|------|-------|------|
| ENSG00000205189 | ZBTB10      | 0.61 | -0.71 | 0.00 |
| ENSG00000047644 | WWC3        | 0.72 | -0.47 | 0.00 |
| ENSG00000273270 | AC090114    | 0.52 | -0.95 | 0.00 |
| ENSG00000120925 | RNF170      | 0.65 | -0.63 | 0.00 |
| ENSG00000142731 | PLK4        | 0.58 | -0.79 | 0.00 |
| ENSG00000169213 | RAB3B       | 0.78 | -0.36 | 0.00 |
| ENSG00000215421 | ZNF407      | 0.61 | -0.72 | 0.00 |
| ENSG00000173575 | CHD2        | 0.78 | -0.37 | 0.00 |
| ENSG00000157500 | APPL1       | 0.70 | -0.52 | 0.00 |
| ENSG00000197724 | PHF2        | 0.72 | -0.46 | 0.00 |
| ENSG00000171634 | BPTF        | 0.77 | -0.37 | 0.00 |
| ENSG00000198720 | ANKRD13B    | 0.65 | -0.62 | 0.00 |
| ENSG00000173674 | EIF1AX      | 0.80 | -0.32 | 0.00 |
| ENSG00000158987 | RAPGEF6     | 0.66 | -0.61 | 0.00 |
| ENSG00000275202 | AL161421    | 0.29 | -1.77 | 0.00 |
| ENSG00000112159 | MDN1        | 0.77 | -0.38 | 0.00 |
| ENSG00000187098 | MITF        | 0.46 | -1.11 | 0.00 |
| ENSG00000147144 | CCDC120     | 0.31 | -1.67 | 0.00 |
| ENSG00000105983 | LMBR1       | 0.73 | -0.46 | 0.00 |
| ENSG00000164576 | SAP30L      | 0.73 | -0.45 | 0.00 |
| ENSG00000145777 | TSLP        | 0.19 | -2.38 | 0.00 |
| ENSG00000151208 | DLG5        | 0.76 | -0.39 | 0.00 |
| ENSG00000196155 | PLEKHG4     | 0.77 | -0.37 | 0.00 |
| ENSG00000136141 | LRCH1       | 0.70 | -0.52 | 0.00 |
| ENSG00000153822 | KCNJ16      | 0.73 | -0.46 | 0.00 |
| ENSG00000073711 | PPP2R3A     | 0.62 | -0.69 | 0.00 |
| ENSG00000005889 | ZFX         | 0.68 | -0.56 | 0.00 |
| ENSG00000012048 | BRCA1       | 0.68 | -0.56 | 0.00 |
| ENSG00000164062 | APEH        | 0.79 | -0.35 | 0.00 |
| ENSG00000168734 | PKIG        | 0.66 | -0.60 | 0.00 |
| ENSG00000137710 | RDX         | 0.77 | -0.39 | 0.00 |
| ENSG00000126870 | WDR60       | 0.71 | -0.50 | 0.00 |
| ENSG00000153914 | SREK1       | 0.72 | -0.48 | 0.00 |
| ENSG00000114737 | CISH        | 0.31 | -1.71 | 0.00 |
| ENSG00000167522 | ANKRD11     | 0.80 | -0.33 | 0.00 |
| ENSG00000240038 | AMY2B       | 0.39 | -1.35 | 0.00 |
| ENSG00000213983 | AP1G2       | 0.72 | -0.47 | 0.00 |
| ENSG00000128604 | IRE5        | 0.52 | -0.94 | 0.00 |
| ENSG00000143630 | HCN3        | 0.60 | -0.74 | 0.00 |
| ENSG00000155097 | ATP6V1C1    | 0.78 | -0.36 | 0.00 |
| ENSG00000087460 | GNAS        | 0.72 | -0.47 | 0.00 |
| ENSG00000179981 | TSHZ1       | 0.60 | -0.73 | 0.00 |
| ENSG00000230445 | LRRC37A6P   | 0.27 | -1.86 | 0.00 |
| ENSG00000185565 | LSAMP       | 0.34 | -1.57 | 0.00 |
| ENSG00000197363 | ZNF517      | 0.50 | -0.99 | 0.00 |
| ENSG00000241684 | ADAMTS9-AS2 | 0.17 | -2.52 | 0.00 |
| ENSG00000186350 | RXRA        | 0.77 | -0.37 | 0.00 |
| ENSG00000174628 | IOCK        | 0.51 | -0.97 | 0.00 |
| ENSG00000135473 | PAN2        | 0.68 | -0.55 | 0.00 |
| ENSG00000136982 | DSCC1       | 0.63 | -0.67 | 0.00 |
| ENSG00000140905 | GCSH        | 0.75 | -0.42 | 0.00 |
| ENSG00000122687 | MRM2        | 0.74 | -0.43 | 0.00 |
| ENSG00000158158 | CNNM4       | 0.72 | -0.47 | 0.00 |
| ENSG00000198911 | SREBF2      | 0.78 | -0.36 | 0.00 |
| ENSG00000120693 | SMAD9       | 0.47 | -1.10 | 0.00 |
| ENSG00000118705 | RPN2        | 0.82 | -0.28 | 0.00 |
| ENSG00000154429 | CCSAP       | 0.68 | -0.56 | 0.00 |
| ENSG00000170390 | DCLK2       | 0.37 | -1.44 | 0.00 |
| ENSG00000187535 | IFT140      | 0.69 | -0.54 | 0.00 |
| ENSG00000123096 | SSPN        | 0.54 | -0.89 | 0.00 |
| ENSG00000035499 | DEPDC1B     | 0.68 | -0.55 | 0.00 |

|                  |          |      |        |      |
|------------------|----------|------|--------|------|
| ENSG0000004838   | ZMYND10  | 0.12 | -3.02  | 0.00 |
| ENSG00000072954  | TMEM38A  | 0.38 | -1.41  | 0.00 |
| ENSG00000117791  | MTARC2   | 0.62 | -0.69  | 0.00 |
| ENSG00000244486  | SCARF2   | 0.59 | -0.77  | 0.00 |
| ENSG00000054690  | PLEKHH1  | 0.43 | -1.21  | 0.00 |
| ENSG00000140682  | TGFB111  | 0.66 | -0.60  | 0.00 |
| ENSG00000135451  | TROAP    | 0.68 | -0.55  | 0.00 |
| ENSG00000051180  | RAD51    | 0.61 | -0.71  | 0.00 |
| ENSG00000269113  | TRABD2B  | 0.00 | -8.63  | 0.00 |
| ENSG00000251661  | AC136475 | 0.00 | -10.61 | 0.00 |
| ENSG00000215912  | TTC34    | 0.00 | -8.41  | 0.00 |
| ENSG00000114166  | KAT2B    | 0.61 | -0.71  | 0.00 |
| ENSG00000231160  | KLF3-AS1 | 0.26 | -1.92  | 0.00 |
| ENSG00000126016  | AMOT     | 0.69 | -0.53  | 0.00 |
| ENSG00000162520  | SYNC     | 0.45 | -1.15  | 0.00 |
| ENSG00000127423  | AUNIP    | 0.50 | -0.99  | 0.00 |
| ENSG00000110025  | SNX15    | 0.38 | -1.39  | 0.00 |
| ENSG00000198087  | CD2AP    | 0.75 | -0.42  | 0.00 |
| ENSG00000154237  | LRRK1    | 0.78 | -0.35  | 0.00 |
| ENSG00000167182  | SP2      | 0.70 | -0.52  | 0.00 |
| ENSG00000006047  | YBX2     | 0.16 | -2.68  | 0.00 |
| ENSG00000104983  | CCDC61   | 0.62 | -0.68  | 0.00 |
| ENSG00000142156  | COL6A1   | 0.82 | -0.29  | 0.00 |
| ENSG00000176444  | CLK2     | 0.75 | -0.42  | 0.00 |
| ENSG000000088340 | FER1L4   | 0.53 | -0.92  | 0.00 |
| ENSG00000164190  | NIPBL    | 0.70 | -0.52  | 0.00 |
| ENSG00000125450  | NUP85    | 0.74 | -0.43  | 0.00 |
| ENSG00000130402  | ACTN4    | 0.78 | -0.35  | 0.00 |
| ENSG00000168078  | PBK      | 0.70 | -0.51  | 0.00 |
| ENSG00000204623  | ZNRD1ASP | 0.49 | -1.03  | 0.00 |
| ENSG00000100722  | ZC3H14   | 0.70 | -0.52  | 0.00 |
| ENSG00000104626  | ERI1     | 0.70 | -0.51  | 0.00 |
| ENSG00000213639  | PPP1CB   | 0.79 | -0.34  | 0.00 |
| ENSG00000115255  | REEP6    | 0.51 | -0.96  | 0.00 |
| ENSG00000123643  | SLC36A1  | 0.65 | -0.61  | 0.00 |
| ENSG00000141627  | DYM      | 0.70 | -0.51  | 0.00 |
| ENSG00000267801  | AC087289 | 0.48 | -1.06  | 0.00 |
| ENSG00000243156  | MICAL3   | 0.69 | -0.54  | 0.00 |
| ENSG00000123219  | CENPK    | 0.60 | -0.73  | 0.00 |
| ENSG00000172469  | MANEA    | 0.53 | -0.92  | 0.00 |
| ENSG00000223802  | CERS1    | 0.43 | -1.22  | 0.00 |
| ENSG00000137478  | FCHSD2   | 0.69 | -0.53  | 0.00 |
| ENSG00000221988  | PPT2     | 0.69 | -0.54  | 0.00 |
| ENSG00000172534  | HCFC1    | 0.79 | -0.34  | 0.00 |
| ENSG00000184307  | ZDHHC23  | 0.66 | -0.59  | 0.00 |
| ENSG00000169679  | BUB1     | 0.76 | -0.39  | 0.00 |
| ENSG00000189339  | SLC35E2B | 0.78 | -0.36  | 0.00 |
| ENSG00000166803  | PCLAF    | 0.77 | -0.37  | 0.00 |
| ENSG00000277701  | AC159540 | 0.48 | -1.07  | 0.00 |
| ENSG00000272462  | U91328   | 0.39 | -1.35  | 0.00 |
| ENSG00000119285  | HEATR1   | 0.80 | -0.32  | 0.00 |
| ENSG00000185236  | RAB11B   | 0.79 | -0.34  | 0.00 |
| ENSG00000116678  | LEPR     | 0.62 | -0.70  | 0.00 |
| ENSG00000139973  | SYT16    | 0.47 | -1.09  | 0.00 |
| ENSG00000110583  | NAA40    | 0.74 | -0.43  | 0.00 |
| ENSG00000196159  | FAT4     | 0.39 | -1.36  | 0.00 |
| ENSG00000151789  | ZNF385D  | 0.51 | -0.99  | 0.00 |
| ENSG00000164904  | ALDH7A1  | 0.79 | -0.35  | 0.00 |
| ENSG00000065613  | SLK      | 0.70 | -0.51  | 0.00 |
| ENSG00000204442  | FAM155A  | 0.53 | -0.91  | 0.00 |
| ENSG00000137166  | FOXP4    | 0.79 | -0.33  | 0.00 |

|                 |             |      |        |      |
|-----------------|-------------|------|--------|------|
| ENSG00000140598 | EFL1        | 0.70 | -0.52  | 0.00 |
| ENSG00000062716 | VMP1        | 0.80 | -0.32  | 0.00 |
| ENSG00000148082 | SHC3        | 0.69 | -0.53  | 0.00 |
| ENSG00000073111 | MCM2        | 0.76 | -0.39  | 0.00 |
| ENSG00000169919 | GUSB        | 0.66 | -0.59  | 0.00 |
| ENSG00000116005 | PCYOX1      | 0.77 | -0.37  | 0.00 |
| ENSG00000286112 | AL441992    | 0.33 | -1.58  | 0.00 |
| ENSG00000169682 | SPNS1       | 0.72 | -0.48  | 0.00 |
| ENSG00000249631 | AC005699    | 0.00 | -9.23  | 0.00 |
| ENSG00000234685 | NUS1P2      | 0.51 | -0.98  | 0.00 |
| ENSG00000169258 | GPRIN1      | 0.77 | -0.37  | 0.00 |
| ENSG00000171208 | NETO2       | 0.78 | -0.37  | 0.00 |
| ENSG00000245112 | SMARCA5-AS1 | 0.51 | -0.97  | 0.00 |
| ENSG00000137073 | UBAP2       | 0.74 | -0.43  | 0.00 |
| ENSG00000116560 | SFPO        | 0.83 | -0.28  | 0.00 |
| ENSG00000107518 | ATRNL1      | 0.36 | -1.46  | 0.00 |
| ENSG00000188878 | FBF1        | 0.73 | -0.46  | 0.00 |
| ENSG00000008405 | CRY1        | 0.69 | -0.53  | 0.00 |
| ENSG00000155561 | NUP205      | 0.79 | -0.34  | 0.00 |
| ENSG00000177707 | NECTIN3     | 0.63 | -0.67  | 0.00 |
| ENSG00000130559 | CAMSAP1     | 0.75 | -0.42  | 0.00 |
| ENSG00000172345 | STARD5      | 0.40 | -1.34  | 0.00 |
| ENSG00000079134 | THOC1       | 0.72 | -0.48  | 0.00 |
| ENSG00000177302 | TOP3A       | 0.76 | -0.40  | 0.00 |
| ENSG00000185339 | TCN2        | 0.60 | -0.75  | 0.00 |
| ENSG00000198826 | ARHGAP11A   | 0.68 | -0.56  | 0.00 |
| ENSG00000164754 | RAD21       | 0.77 | -0.37  | 0.00 |
| ENSG00000112796 | ENPP5       | 0.46 | -1.12  | 0.00 |
| ENSG00000107758 | PPP3CB      | 0.78 | -0.37  | 0.00 |
| ENSG00000184611 | KCNH7       | 0.04 | -4.60  | 0.00 |
| ENSG00000164879 | CA3         | 0.77 | -0.39  | 0.00 |
| ENSG00000138617 | PARP16      | 0.55 | -0.86  | 0.00 |
| ENSG00000095539 | SEMA4G      | 0.64 | -0.65  | 0.00 |
| ENSG00000118162 | KPTN        | 0.60 | -0.73  | 0.00 |
| ENSG00000250376 | AC093720    | 0.00 | -11.92 | 0.00 |
| ENSG00000152240 | HAUS1       | 0.64 | -0.65  | 0.00 |
| ENSG00000183889 | AC138969    | 0.59 | -0.76  | 0.00 |
| ENSG00000164794 | KCNV1       | 0.53 | -0.93  | 0.00 |
| ENSG00000160551 | TAOK1       | 0.78 | -0.36  | 0.00 |
| ENSG00000132466 | ANKRD17     | 0.81 | -0.30  | 0.00 |
| ENSG00000183495 | EP400       | 0.80 | -0.32  | 0.00 |
| ENSG00000106144 | CASP2       | 0.56 | -0.85  | 0.00 |
| ENSG00000130522 | IJUND       | 0.79 | -0.34  | 0.00 |
| ENSG00000107929 | LARP4B      | 0.80 | -0.33  | 0.00 |
| ENSG00000095002 | MSH2        | 0.71 | -0.48  | 0.00 |
| ENSG00000177694 | NAALADL2    | 0.22 | -2.16  | 0.00 |
| ENSG00000094914 | AAAS        | 0.78 | -0.36  | 0.00 |
| ENSG00000166272 | WBP1L       | 0.78 | -0.35  | 0.00 |
| ENSG00000164053 | ATRIP       | 0.60 | -0.73  | 0.00 |
| ENSG00000186522 | SEPTIN10    | 0.74 | -0.44  | 0.00 |
| ENSG00000182957 | SPATA13     | 0.46 | -1.12  | 0.00 |
| ENSG00000167702 | KIFC2       | 0.65 | -0.63  | 0.00 |
| ENSG00000126243 | LRFN3       | 0.62 | -0.70  | 0.00 |
| ENSG00000223891 | OSER1-DT    | 0.61 | -0.70  | 0.00 |
| ENSG00000198089 | SFI1        | 0.66 | -0.60  | 0.00 |
| ENSG00000166046 | TCP11L2     | 0.58 | -0.78  | 0.00 |
| ENSG00000147202 | DIAPH2      | 0.62 | -0.70  | 0.00 |
| ENSG00000121671 | CRY2        | 0.63 | -0.67  | 0.00 |
| ENSG00000136720 | HS6ST1      | 0.69 | -0.54  | 0.00 |
| ENSG00000044459 | CNTLN       | 0.54 | -0.88  | 0.00 |
| ENSG00000132002 | DNAJB1      | 0.80 | -0.32  | 0.00 |

|                 |                |      |        |      |
|-----------------|----------------|------|--------|------|
| ENSG00000044090 | CUL7           | 0.78 | -0.36  | 0.00 |
| ENSG00000164087 | POC1A          | 0.70 | -0.52  | 0.00 |
| ENSG00000084234 | APLP2          | 0.80 | -0.32  | 0.00 |
| ENSG00000158062 | UBXN11         | 0.64 | -0.64  | 0.00 |
| ENSG00000136111 | TBC1D4         | 0.70 | -0.52  | 0.00 |
| ENSG00000177189 | RPS6KA3        | 0.73 | -0.45  | 0.00 |
| ENSG00000261061 | AC092718       | 0.56 | -0.83  | 0.00 |
| ENSG00000185630 | PBX1           | 0.73 | -0.46  | 0.00 |
| ENSG00000171357 | LURAP1         | 0.13 | -2.89  | 0.00 |
| ENSG00000026036 | RTEL1-TNFRSF6B | 0.41 | -1.29  | 0.00 |
| ENSG00000181827 | RFX7           | 0.70 | -0.52  | 0.00 |
| ENSG00000147854 | UHRF2          | 0.69 | -0.54  | 0.00 |
| ENSG00000117009 | KMO            | 0.37 | -1.42  | 0.00 |
| ENSG00000266445 | NARF-AS1       | 0.00 | -11.72 | 0.00 |
| ENSG00000119707 | RBM25          | 0.78 | -0.35  | 0.00 |
| ENSG00000141577 | CEP131         | 0.74 | -0.43  | 0.00 |
| ENSG00000228716 | DHFR           | 0.61 | -0.72  | 0.00 |
| ENSG00000075702 | WDR62          | 0.74 | -0.43  | 0.00 |
| ENSG00000187736 | NHEJ1          | 0.70 | -0.52  | 0.00 |
| ENSG00000006607 | FARP2          | 0.76 | -0.40  | 0.00 |
| ENSG00000125458 | NT5C           | 0.65 | -0.63  | 0.00 |
| ENSG00000120896 | SORBS3         | 0.77 | -0.37  | 0.00 |
| ENSG00000149636 | DSN1           | 0.69 | -0.53  | 0.00 |
| ENSG00000188092 | GPR89B         | 0.51 | -0.98  | 0.00 |
| ENSG00000235852 | AC005540       | 0.65 | -0.62  | 0.00 |
| ENSG00000163617 | CCDC191        | 0.56 | -0.84  | 0.00 |
| ENSG00000101596 | SMCHD1         | 0.70 | -0.51  | 0.00 |
| ENSG00000113448 | PDE4D          | 0.51 | -0.98  | 0.00 |
| ENSG00000081026 | MAGI3          | 0.59 | -0.76  | 0.00 |
| ENSG00000078699 | CBFA2T2        | 0.70 | -0.51  | 0.00 |
| ENSG00000213186 | TRIM59         | 0.50 | -1.01  | 0.00 |
| ENSG00000163041 | H3-3A          | 0.74 | -0.44  | 0.00 |
| ENSG00000145495 | MARCF6         | 0.77 | -0.37  | 0.00 |
| ENSG00000132434 | LANCL2         | 0.75 | -0.42  | 0.00 |
| ENSG00000175505 | CLCF1          | 0.74 | -0.44  | 0.00 |
| ENSG00000129691 | ASH2L          | 0.78 | -0.37  | 0.00 |
| ENSG00000127483 | HP1BP3         | 0.80 | -0.33  | 0.00 |
| ENSG00000183496 | MEX3B          | 0.26 | -1.93  | 0.00 |
| ENSG00000137251 | TINAG          | 0.19 | -2.43  | 0.00 |
| ENSG00000176155 | CCDC57         | 0.79 | -0.34  | 0.00 |
| ENSG00000167173 | C15orf39       | 0.61 | -0.72  | 0.00 |
| ENSG00000128266 | GNAZ           | 0.23 | -2.14  | 0.00 |
| ENSG00000128708 | HAT1           | 0.77 | -0.38  | 0.00 |
| ENSG00000135541 | AHI1           | 0.55 | -0.85  | 0.00 |
| ENSG00000119725 | ZNF410         | 0.68 | -0.56  | 0.00 |
| ENSG00000140836 | ZFH3           | 0.76 | -0.40  | 0.00 |
| ENSG00000197275 | RAD54B         | 0.66 | -0.59  | 0.00 |
| ENSG00000213886 | UBD            | 0.20 | -2.33  | 0.00 |
| ENSG00000125827 | TMX4           | 0.76 | -0.40  | 0.00 |
| ENSG00000175928 | LRRN1          | 0.61 | -0.70  | 0.00 |
| ENSG00000146039 | SLC17A4        | 0.00 | -9.19  | 0.00 |
| ENSG00000162337 | LRP5           | 0.75 | -0.41  | 0.00 |
| ENSG00000100629 | CEP128         | 0.43 | -1.23  | 0.00 |
| ENSG00000167306 | MYO5B          | 0.62 | -0.69  | 0.00 |
| ENSG00000054219 | LY75           | 0.63 | -0.68  | 0.00 |
| ENSG00000130829 | DUSP9          | 0.36 | -1.46  | 0.00 |
| ENSG00000141480 | ARRB2          | 0.71 | -0.50  | 0.00 |
| ENSG00000165186 | PTCHD1         | 0.53 | -0.91  | 0.00 |
| ENSG00000141519 | CCDC40         | 0.60 | -0.73  | 0.00 |
| ENSG00000264538 | SUZ12P1        | 0.57 | -0.81  | 0.00 |
| ENSG00000115993 | TRAK2          | 0.77 | -0.37  | 0.00 |

|                 |               |      |        |      |
|-----------------|---------------|------|--------|------|
| ENSG00000164323 | CFAP97        | 0.72 | -0.47  | 0.00 |
| ENSG00000135048 | CEMIP2        | 0.79 | -0.34  | 0.00 |
| ENSG00000287126 | AC108488      | 0.37 | -1.44  | 0.00 |
| ENSG00000053371 | AKR7A2        | 0.69 | -0.54  | 0.00 |
| ENSG00000140450 | ARRDC4        | 0.65 | -0.63  | 0.00 |
| ENSG00000180228 | PRKRA         | 0.74 | -0.44  | 0.00 |
| ENSG00000105677 | TMEM147       | 0.76 | -0.40  | 0.00 |
| ENSG00000178440 | TIMM23B-AGAP6 | 0.34 | -1.56  | 0.00 |
| ENSG00000054793 | ATP9A         | 0.79 | -0.35  | 0.00 |
| ENSG00000104518 | GSDMD         | 0.68 | -0.56  | 0.00 |
| ENSG00000103257 | SLC7A5        | 0.82 | -0.29  | 0.00 |
| ENSG00000177459 | ERICH5        | 0.30 | -1.72  | 0.00 |
| ENSG00000215105 | TTC3P1        | 0.29 | -1.79  | 0.00 |
| ENSG00000186193 | SAPCD2        | 0.72 | -0.47  | 0.00 |
| ENSG00000157106 | SMG1          | 0.77 | -0.37  | 0.00 |
| ENSG00000160310 | PRMT2         | 0.79 | -0.34  | 0.00 |
| ENSG00000162745 | OLFML2B       | 0.25 | -1.99  | 0.00 |
| ENSG00000176244 | ACBD7         | 0.56 | -0.85  | 0.00 |
| ENSG00000143149 | ALDH9A1       | 0.80 | -0.32  | 0.00 |
| ENSG00000236609 | ZNF853        | 0.13 | -2.89  | 0.00 |
| ENSG00000277027 | RMRP          | 0.01 | -6.33  | 0.00 |
| ENSG00000169398 | PTK2          | 0.73 | -0.45  | 0.00 |
| ENSG00000116830 | TTF2          | 0.71 | -0.49  | 0.00 |
| ENSG00000100479 | POLE2         | 0.52 | -0.95  | 0.00 |
| ENSG00000149256 | TENM4         | 0.48 | -1.06  | 0.00 |
| ENSG00000168066 | SF1           | 0.82 | -0.28  | 0.00 |
| ENSG00000132846 | ZBED3         | 0.65 | -0.62  | 0.00 |
| ENSG00000162878 | PKDCC         | 0.61 | -0.71  | 0.00 |
| ENSG00000112249 | ASCC3         | 0.77 | -0.37  | 0.00 |
| ENSG00000149308 | NPAT          | 0.56 | -0.83  | 0.00 |
| ENSG00000074416 | MGLL          | 0.83 | -0.27  | 0.00 |
| ENSG00000261221 | ZNF865        | 0.73 | -0.45  | 0.00 |
| ENSG00000138400 | MDH1B         | 0.46 | -1.12  | 0.00 |
| ENSG00000026103 | FAS           | 0.69 | -0.54  | 0.00 |
| ENSG00000106004 | HOXA5         | 0.66 | -0.59  | 0.00 |
| ENSG00000013288 | MAN2B2        | 0.78 | -0.35  | 0.00 |
| ENSG00000092439 | TRPM7         | 0.70 | -0.51  | 0.00 |
| ENSG00000113360 | DROSHA        | 0.78 | -0.35  | 0.00 |
| ENSG00000101049 | SGK2          | 0.64 | -0.63  | 0.00 |
| ENSG00000138162 | TACC2         | 0.73 | -0.46  | 0.00 |
| ENSG00000076826 | CAMSAP3       | 0.36 | -1.46  | 0.00 |
| ENSG00000117155 | SSX2IP        | 0.65 | -0.63  | 0.00 |
| ENSG00000197555 | SIPA1L1       | 0.61 | -0.70  | 0.00 |
| ENSG00000181523 | SGSH          | 0.74 | -0.43  | 0.00 |
| ENSG00000046651 | OFD1          | 0.69 | -0.53  | 0.00 |
| ENSG00000114315 | HES1          | 0.56 | -0.85  | 0.00 |
| ENSG00000181588 | MEX3D         | 0.68 | -0.56  | 0.00 |
| ENSG00000121858 | TNFSF10       | 0.69 | -0.53  | 0.00 |
| ENSG00000137571 | SLCO5A1       | 0.37 | -1.43  | 0.00 |
| ENSG00000095787 | WAC           | 0.80 | -0.32  | 0.00 |
| ENSG00000168818 | STX18         | 0.77 | -0.38  | 0.00 |
| ENSG00000234420 | ZNF37BP       | 0.55 | -0.85  | 0.00 |
| ENSG00000197417 | SHPK          | 0.73 | -0.45  | 0.00 |
| ENSG00000185515 | BRCC3         | 0.64 | -0.64  | 0.00 |
| ENSG00000225329 | LHEPL3-AS2    | 0.00 | -10.00 | 0.00 |
| ENSG00000120913 | PDLIM2        | 0.63 | -0.66  | 0.00 |
| ENSG00000109819 | PPARGC1A      | 0.60 | -0.75  | 0.00 |
| ENSG00000188493 | C19orf54      | 0.72 | -0.47  | 0.00 |
| ENSG00000151693 | ASAP2         | 0.68 | -0.55  | 0.00 |
| ENSG00000125447 | GGA3          | 0.68 | -0.56  | 0.00 |
| ENSG00000113391 | FAM172A       | 0.61 | -0.72  | 0.00 |

|                 |              |      |        |      |
|-----------------|--------------|------|--------|------|
| ENSG00000110315 | RNF141       | 0.75 | -0.41  | 0.00 |
| ENSG00000185201 | IFITM2       | 0.38 | -1.41  | 0.00 |
| ENSG00000106976 | DNM1         | 0.70 | -0.51  | 0.00 |
| ENSG00000255468 | AP001107     | 0.23 | -2.13  | 0.00 |
| ENSG00000049246 | PER3         | 0.64 | -0.65  | 0.00 |
| ENSG00000233610 | LINC00462    | 0.03 | -5.07  | 0.00 |
| ENSG00000170608 | FOXA3        | 0.00 | -10.30 | 0.00 |
| ENSG00000185504 | FAAP100      | 0.77 | -0.38  | 0.00 |
| ENSG00000063587 | ZNF275       | 0.75 | -0.41  | 0.00 |
| ENSG00000071246 | VASH1        | 0.23 | -2.12  | 0.00 |
| ENSG00000074657 | ZNF532       | 0.60 | -0.73  | 0.00 |
| ENSG00000040531 | CTNS         | 0.66 | -0.59  | 0.00 |
| ENSG00000120800 | UTP20        | 0.80 | -0.32  | 0.00 |
| ENSG00000223770 | CACNA2D1-AS1 | 0.04 | -4.52  | 0.00 |
| ENSG00000276975 | HYDIN2       | 0.28 | -1.85  | 0.00 |
| ENSG00000125648 | SLC25A23     | 0.79 | -0.34  | 0.00 |
| ENSG00000196323 | ZBTB44       | 0.57 | -0.81  | 0.00 |
| ENSG00000114999 | TTL          | 0.80 | -0.32  | 0.00 |
| ENSG00000167733 | HSD11B1L     | 0.59 | -0.76  | 0.00 |
| ENSG00000198752 | CDC42BPB     | 0.82 | -0.29  | 0.00 |
| ENSG00000104522 | TSTA3        | 0.74 | -0.43  | 0.00 |
| ENSG00000140367 | UBE2O2       | 0.73 | -0.46  | 0.00 |
| ENSG00000242732 | RTL5         | 0.40 | -1.31  | 0.00 |
| ENSG00000102221 | JADE3        | 0.71 | -0.49  | 0.00 |
| ENSG00000279453 | Z99129       | 0.44 | -1.17  | 0.00 |
| ENSG00000136630 | HLX          | 0.67 | -0.58  | 0.00 |
| ENSG00000170430 | MGMT         | 0.79 | -0.35  | 0.00 |
| ENSG00000225864 | AL645939     | 0.19 | -2.39  | 0.00 |
| ENSG00000203668 | CHML         | 0.75 | -0.42  | 0.00 |
| ENSG00000055917 | PUM2         | 0.72 | -0.48  | 0.00 |
| ENSG00000134072 | CAMK1        | 0.71 | -0.50  | 0.00 |
| ENSG00000105662 | CRTC1        | 0.74 | -0.44  | 0.00 |
| ENSG00000162415 | ZSWIM5       | 0.00 | -8.68  | 0.00 |
| ENSG00000196922 | ZNF252P      | 0.64 | -0.64  | 0.00 |
| ENSG00000169733 | RFNG         | 0.71 | -0.50  | 0.00 |
| ENSG00000119596 | YLP1         | 0.80 | -0.32  | 0.00 |
| ENSG00000144959 | NCEH1        | 0.81 | -0.30  | 0.00 |
| ENSG00000132017 | DCAF15       | 0.74 | -0.43  | 0.00 |
| ENSG00000155893 | PXYLP1       | 0.39 | -1.36  | 0.00 |
| ENSG00000160584 | SIK3         | 0.77 | -0.38  | 0.00 |
| ENSG00000215790 | SLC35E2A     | 0.77 | -0.38  | 0.00 |
| ENSG00000160959 | LRRC14       | 0.78 | -0.35  | 0.00 |
| ENSG00000205593 | DENND6B      | 0.33 | -1.60  | 0.00 |
| ENSG00000110013 | SIAE         | 0.73 | -0.45  | 0.00 |
| ENSG00000135525 | MAP7         | 0.50 | -1.00  | 0.00 |
| ENSG00000007541 | PIGO         | 0.59 | -0.76  | 0.00 |
| ENSG00000148120 | AOPEP        | 0.72 | -0.48  | 0.00 |
| ENSG00000127603 | MACF1        | 0.80 | -0.32  | 0.00 |
| ENSG00000283563 | AC098650     | 0.00 | -9.56  | 0.00 |
| ENSG00000067836 | ROGDI        | 0.67 | -0.57  | 0.00 |
| ENSG00000166912 | MTMR10       | 0.58 | -0.79  | 0.00 |
| ENSG00000142875 | PRKACB       | 0.67 | -0.58  | 0.00 |
| ENSG00000117748 | RPA2         | 0.76 | -0.40  | 0.00 |
| ENSG00000187231 | SESTD1       | 0.62 | -0.70  | 0.00 |
| ENSG00000151882 | CCL28        | 0.43 | -1.23  | 0.00 |
| ENSG00000125618 | PAX8         | 0.84 | -0.26  | 0.00 |
| ENSG00000166326 | TRIM44       | 0.83 | -0.27  | 0.00 |
| ENSG00000239521 | CASTOR3      | 0.61 | -0.71  | 0.00 |
| ENSG00000117448 | AKR1A1       | 0.80 | -0.33  | 0.00 |
| ENSG00000105323 | HNRNPUL1     | 0.82 | -0.29  | 0.00 |
| ENSG00000174938 | SEZ6L2       | 0.74 | -0.44  | 0.00 |



|                 |            |      |        |      |
|-----------------|------------|------|--------|------|
| ENSG00000144040 | SFXN5      | 0.75 | -0.42  | 0.00 |
| ENSG00000174358 | SLC6A19    | 0.03 | -5.05  | 0.00 |
| ENSG00000138119 | MYOF       | 0.83 | -0.26  | 0.00 |
| ENSG00000140545 | MFGF8      | 0.74 | -0.43  | 0.00 |
| ENSG00000133069 | TMCC2      | 0.66 | -0.59  | 0.00 |
| ENSG00000232859 | LYRM9      | 0.49 | -1.02  | 0.00 |
| ENSG00000132824 | SERINC3    | 0.82 | -0.28  | 0.00 |
| ENSG00000163507 | CIP2A      | 0.71 | -0.50  | 0.00 |
| ENSG00000185477 | GPRIN3     | 0.35 | -1.53  | 0.00 |
| ENSG00000121741 | ZMYM2      | 0.76 | -0.40  | 0.00 |
| ENSG00000148719 | DNAJB12    | 0.79 | -0.34  | 0.00 |
| ENSG00000163624 | CDS1       | 0.38 | -1.40  | 0.00 |
| ENSG00000079841 | RIMS1      | 0.19 | -2.39  | 0.00 |
| ENSG00000179361 | ARID3B     | 0.56 | -0.85  | 0.00 |
| ENSG00000178467 | P4HTM      | 0.61 | -0.72  | 0.00 |
| ENSG00000152492 | CCDC50     | 0.80 | -0.32  | 0.00 |
| ENSG00000235501 | AC105942   | 0.41 | -1.30  | 0.00 |
| ENSG00000238228 | OR7E7P     | 0.12 | -3.01  | 0.00 |
| ENSG00000140688 | RUSF1      | 0.71 | -0.50  | 0.00 |
| ENSG00000004866 | ST7        | 0.73 | -0.45  | 0.00 |
| ENSG00000198075 | SULT1C4    | 0.00 | -9.48  | 0.00 |
| ENSG00000143164 | DCAF6      | 0.81 | -0.30  | 0.00 |
| ENSG00000035928 | RFC1       | 0.79 | -0.34  | 0.00 |
| ENSG00000117016 | RIMS3      | 0.39 | -1.34  | 0.00 |
| ENSG00000144115 | THNSL2     | 0.65 | -0.61  | 0.00 |
| ENSG00000277053 | GTF2IP1    | 0.69 | -0.53  | 0.00 |
| ENSG00000213465 | ARL2       | 0.77 | -0.38  | 0.00 |
| ENSG00000126215 | XRCC3      | 0.71 | -0.49  | 0.00 |
| ENSG00000124164 | VAPB       | 0.62 | -0.69  | 0.00 |
| ENSG00000120327 | PCDHB14    | 0.28 | -1.83  | 0.00 |
| ENSG00000151623 | NR3C2      | 0.49 | -1.02  | 0.00 |
| ENSG00000123416 | TUBA1B     | 0.77 | -0.37  | 0.00 |
| ENSG00000188647 | PTAR1      | 0.75 | -0.42  | 0.00 |
| ENSG00000007168 | PAFAH1B1   | 0.67 | -0.59  | 0.00 |
| ENSG00000166398 | GARRE1     | 0.73 | -0.46  | 0.00 |
| ENSG00000128567 | PODXL      | 0.42 | -1.25  | 0.00 |
| ENSG00000046647 | GEMIN8     | 0.65 | -0.63  | 0.00 |
| ENSG00000167711 | SERPINE2   | 0.33 | -1.60  | 0.00 |
| ENSG00000068383 | INPP5A     | 0.76 | -0.39  | 0.00 |
| ENSG00000167202 | TBC1D2B    | 0.79 | -0.33  | 0.00 |
| ENSG00000227036 | LINC00511  | 0.58 | -0.78  | 0.00 |
| ENSG00000188596 | CFAP54     | 0.24 | -2.05  | 0.00 |
| ENSG00000060656 | PTPRU      | 0.60 | -0.75  | 0.00 |
| ENSG00000171798 | KNDC1      | 0.00 | -8.34  | 0.00 |
| ENSG00000223764 | LINC02593  | 0.01 | -6.29  | 0.00 |
| ENSG00000123570 | RAB9B      | 0.59 | -0.75  | 0.00 |
| ENSG00000288640 | AC005192   | 0.00 | -9.54  | 0.00 |
| ENSG00000230535 | BASP1P1    | 0.16 | -2.61  | 0.00 |
| ENSG00000103647 | CORO2B     | 0.32 | -1.63  | 0.00 |
| ENSG00000175318 | GRAMD2A    | 0.05 | -4.36  | 0.00 |
| ENSG00000261611 | AC010547   | 0.17 | -2.60  | 0.00 |
| ENSG00000006756 | ARSD       | 0.73 | -0.44  | 0.00 |
| ENSG00000159423 | ALDH4A1    | 0.75 | -0.42  | 0.00 |
| ENSG00000230438 | SERPINB9P1 | 0.57 | -0.81  | 0.00 |
| ENSG00000138286 | FAM149B1   | 0.73 | -0.46  | 0.00 |
| ENSG00000148158 | SNX30      | 0.72 | -0.47  | 0.00 |
| ENSG00000099284 | MACROH2A2  | 0.67 | -0.58  | 0.00 |
| ENSG00000142102 | PGGHG      | 0.63 | -0.68  | 0.00 |
| ENSG00000164104 | HMGB2      | 0.65 | -0.62  | 0.00 |
| ENSG00000177791 | MYOZ1      | 0.00 | -10.77 | 0.00 |
| ENSG00000231013 | SCTR-AS1   | 0.00 | -9.50  | 0.00 |

|                 |           |      |       |      |
|-----------------|-----------|------|-------|------|
| ENSG00000132405 | TBC1D14   | 0.82 | -0.28 | 0.00 |
| ENSG00000137817 | PARP6     | 0.73 | -0.46 | 0.00 |
| ENSG00000166889 | PATL1     | 0.80 | -0.32 | 0.00 |
| ENSG00000123374 | CDK2      | 0.69 | -0.54 | 0.00 |
| ENSG00000177425 | PAWR      | 0.76 | -0.40 | 0.00 |
| ENSG00000122547 | EFPD1     | 0.68 | -0.55 | 0.00 |
| ENSG00000135766 | EGLN1     | 0.80 | -0.33 | 0.00 |
| ENSG00000142798 | HSPG2     | 0.82 | -0.29 | 0.00 |
| ENSG00000145949 | MYLK4     | 0.23 | -2.15 | 0.00 |
| ENSG00000048707 | VPS13D    | 0.76 | -0.39 | 0.00 |
| ENSG00000198246 | SLC29A3   | 0.42 | -1.25 | 0.00 |
| ENSG00000214113 | LYRM4     | 0.63 | -0.66 | 0.00 |
| ENSG00000140025 | EFCAB11   | 0.60 | -0.75 | 0.00 |
| ENSG00000172071 | EIF2AK3   | 0.67 | -0.57 | 0.00 |
| ENSG00000130726 | TRIM28    | 0.81 | -0.31 | 0.00 |
| ENSG00000162341 | TPCN2     | 0.71 | -0.50 | 0.00 |
| ENSG00000075790 | BCAP29    | 0.55 | -0.85 | 0.00 |
| ENSG00000165023 | DIRAS2    | 0.10 | -3.30 | 0.00 |
| ENSG00000007944 | MYLIP     | 0.59 | -0.76 | 0.00 |
| ENSG00000185344 | ATP6V0A2  | 0.73 | -0.45 | 0.00 |
| ENSG00000136848 | DAB2IP    | 0.44 | -1.19 | 0.00 |
| ENSG00000170037 | CNTROB    | 0.77 | -0.37 | 0.00 |
| ENSG00000104133 | SPG11     | 0.69 | -0.54 | 0.00 |
| ENSG00000131446 | MGAT1     | 0.83 | -0.26 | 0.00 |
| ENSG00000221829 | FANCG     | 0.77 | -0.37 | 0.00 |
| ENSG00000096968 | JAK2      | 0.57 | -0.81 | 0.00 |
| ENSG00000175274 | TP53I11   | 0.57 | -0.81 | 0.00 |
| ENSG00000153044 | CENPH     | 0.69 | -0.53 | 0.00 |
| ENSG00000056097 | ZFR       | 0.80 | -0.33 | 0.00 |
| ENSG00000141446 | ESCO1     | 0.64 | -0.65 | 0.00 |
| ENSG00000139631 | CSAD      | 0.63 | -0.66 | 0.00 |
| ENSG00000181856 | SLC2A4    | 0.05 | -4.32 | 0.00 |
| ENSG00000104835 | SARS2     | 0.74 | -0.44 | 0.00 |
| ENSG00000187624 | C17orf97  | 0.45 | -1.16 | 0.00 |
| ENSG00000164976 | MYORG     | 0.55 | -0.87 | 0.00 |
| ENSG00000128274 | A4GALT    | 0.59 | -0.77 | 0.00 |
| ENSG00000139083 | ETV6      | 0.80 | -0.31 | 0.00 |
| ENSG00000130787 | HIP1R     | 0.78 | -0.37 | 0.00 |
| ENSG00000178971 | CTC1      | 0.70 | -0.51 | 0.00 |
| ENSG00000088280 | ASAP3     | 0.71 | -0.49 | 0.00 |
| ENSG00000094975 | SUCO      | 0.75 | -0.42 | 0.00 |
| ENSG00000064989 | CALCRL    | 0.43 | -1.20 | 0.00 |
| ENSG00000104886 | PLEKHJ1   | 0.64 | -0.65 | 0.00 |
| ENSG00000128908 | INO80     | 0.75 | -0.41 | 0.00 |
| ENSG00000149476 | TKFC      | 0.71 | -0.49 | 0.00 |
| ENSG00000135913 | USP37     | 0.60 | -0.73 | 0.00 |
| ENSG00000133624 | ZNF767P   | 0.67 | -0.57 | 0.00 |
| ENSG00000085788 | DDHD2     | 0.66 | -0.61 | 0.00 |
| ENSG00000185420 | SMYD3     | 0.72 | -0.47 | 0.00 |
| ENSG00000196498 | NCOR2     | 0.84 | -0.26 | 0.00 |
| ENSG00000235269 | LINC02331 | 0.00 | -9.87 | 0.00 |
| ENSG00000168268 | NT5DC2    | 0.76 | -0.39 | 0.00 |
| ENSG00000005206 | SPPL2B    | 0.73 | -0.45 | 0.00 |
| ENSG00000243302 | AC018638  | 0.56 | -0.83 | 0.00 |
| ENSG00000078403 | MLLT10    | 0.71 | -0.49 | 0.00 |
| ENSG00000104375 | STK3      | 0.71 | -0.49 | 0.00 |
| ENSG00000125676 | THOC2     | 0.75 | -0.42 | 0.00 |
| ENSG00000181744 | DIPK2A    | 0.69 | -0.54 | 0.00 |
| ENSG00000151461 | UPF2      | 0.72 | -0.48 | 0.00 |
| ENSG00000130695 | CEP85     | 0.73 | -0.46 | 0.00 |
| ENSG00000160211 | G6PD      | 0.84 | -0.25 | 0.00 |

|                 |             |      |        |      |
|-----------------|-------------|------|--------|------|
| ENSG00000223658 | C1GALT1C1L  | 0.45 | -1.16  | 0.00 |
| ENSG00000286847 | AC007036    | 0.00 | -10.07 | 0.00 |
| ENSG00000170085 | SIMC1       | 0.64 | -0.65  | 0.00 |
| ENSG00000131242 | RAB11FIP4   | 0.22 | -2.16  | 0.00 |
| ENSG00000163104 | SMARCAD1    | 0.75 | -0.41  | 0.00 |
| ENSG00000168172 | HOOK3       | 0.76 | -0.39  | 0.00 |
| ENSG00000099849 | RASSF7      | 0.62 | -0.68  | 0.00 |
| ENSG00000024422 | EHD2        | 0.77 | -0.38  | 0.00 |
| ENSG00000052841 | TTC17       | 0.81 | -0.30  | 0.00 |
| ENSG00000272768 | AC004854    | 0.11 | -3.22  | 0.00 |
| ENSG00000109756 | RAPGEF2     | 0.76 | -0.40  | 0.00 |
| ENSG00000110844 | PRPF40B     | 0.72 | -0.47  | 0.00 |
| ENSG00000011295 | TTC19       | 0.57 | -0.80  | 0.00 |
| ENSG00000174516 | PEL13       | 0.62 | -0.70  | 0.00 |
| ENSG00000113580 | NR3C1       | 0.80 | -0.32  | 0.00 |
| ENSG00000183092 | BEGAIN      | 0.26 | -1.93  | 0.00 |
| ENSG00000183283 | DAZAP2      | 0.69 | -0.54  | 0.00 |
| ENSG00000006704 | GTF2IRD1    | 0.78 | -0.37  | 0.00 |
| ENSG00000137285 | TUBB2B      | 0.68 | -0.55  | 0.00 |
| ENSG00000205959 | AC105345    | 0.00 | -8.88  | 0.00 |
| ENSG00000085063 | CD59        | 0.77 | -0.38  | 0.00 |
| ENSG00000140326 | CDAN1       | 0.74 | -0.43  | 0.00 |
| ENSG00000197061 | H4C3        | 0.04 | -4.75  | 0.00 |
| ENSG00000130545 | CRB3        | 0.18 | -2.49  | 0.00 |
| ENSG00000213064 | SFT2D2      | 0.83 | -0.28  | 0.00 |
| ENSG00000087586 | AURKA       | 0.82 | -0.29  | 0.00 |
| ENSG00000103126 | AXIN1       | 0.75 | -0.42  | 0.00 |
| ENSG00000172059 | KLF11       | 0.70 | -0.52  | 0.00 |
| ENSG00000109323 | MANBA       | 0.72 | -0.47  | 0.00 |
| ENSG00000124486 | USP9X       | 0.82 | -0.28  | 0.00 |
| ENSG00000166333 | ILK         | 0.82 | -0.29  | 0.00 |
| ENSG00000103540 | CCP110      | 0.70 | -0.52  | 0.00 |
| ENSG00000101104 | PABPC1L     | 0.74 | -0.44  | 0.00 |
| ENSG00000131788 | PIAS3       | 0.79 | -0.33  | 0.00 |
| ENSG00000141367 | CLTC        | 0.84 | -0.26  | 0.00 |
| ENSG00000149925 | ALDOA       | 0.85 | -0.23  | 0.00 |
| ENSG00000156642 | NPTN        | 0.82 | -0.28  | 0.00 |
| ENSG00000129757 | CDKN1C      | 0.32 | -1.62  | 0.00 |
| ENSG00000141068 | KSR1        | 0.71 | -0.50  | 0.00 |
| ENSG00000128944 | KNSTRN      | 0.71 | -0.49  | 0.00 |
| ENSG00000248801 | C8orf34-AS1 | 0.05 | -4.47  | 0.00 |
| ENSG00000103145 | HCFC1R1     | 0.71 | -0.49  | 0.00 |
| ENSG00000161692 | DBF4B       | 0.73 | -0.46  | 0.00 |
| ENSG00000111581 | NUP107      | 0.78 | -0.37  | 0.00 |
| ENSG00000230606 | AC092683    | 0.42 | -1.26  | 0.00 |
| ENSG00000270659 | AC079610    | 0.00 | -11.73 | 0.00 |
| ENSG00000157933 | SKI         | 0.83 | -0.28  | 0.00 |
| ENSG00000163655 | GMPS        | 0.84 | -0.26  | 0.00 |
| ENSG00000101972 | STAG2       | 0.78 | -0.35  | 0.00 |
| ENSG00000134253 | TRIM45      | 0.66 | -0.60  | 0.00 |
| ENSG00000153237 | CCDC148     | 0.27 | -1.88  | 0.00 |
| ENSG00000108187 | PBLD        | 0.58 | -0.78  | 0.00 |
| ENSG00000186472 | PCLO        | 0.47 | -1.08  | 0.00 |
| ENSG00000197879 | MYO1C       | 0.82 | -0.28  | 0.00 |
| ENSG00000073712 | FERMT2      | 0.73 | -0.45  | 0.00 |
| ENSG00000014914 | MTMR11      | 0.64 | -0.64  | 0.00 |
| ENSG00000047365 | ARAP2       | 0.60 | -0.74  | 0.00 |
| ENSG00000137726 | FXYD6       | 0.16 | -2.63  | 0.00 |
| ENSG00000110195 | FOLR1       | 0.36 | -1.46  | 0.00 |
| ENSG00000134030 | CTIF        | 0.72 | -0.47  | 0.00 |
| ENSG00000269190 | FBXO17      | 0.76 | -0.40  | 0.00 |

|                 |                 |      |        |      |
|-----------------|-----------------|------|--------|------|
| ENSG00000123352 | SPATS2          | 0.76 | -0.40  | 0.00 |
| ENSG00000025796 | SEC63           | 0.76 | -0.39  | 0.00 |
| ENSG00000105738 | SIPAL3          | 0.80 | -0.33  | 0.00 |
| ENSG00000160216 | AGPAT3          | 0.80 | -0.32  | 0.00 |
| ENSG00000158711 | ELK4            | 0.77 | -0.38  | 0.00 |
| ENSG00000121057 | AKAP1           | 0.82 | -0.29  | 0.00 |
| ENSG00000009954 | BAZ1B           | 0.81 | -0.31  | 0.00 |
| ENSG00000149716 | LTO1            | 0.57 | -0.80  | 0.00 |
| ENSG00000161682 | FAM171A2        | 0.48 | -1.05  | 0.00 |
| ENSG00000184719 | RNLS            | 0.69 | -0.54  | 0.00 |
| ENSG00000143919 | CAMKMT          | 0.55 | -0.86  | 0.00 |
| ENSG00000248383 | PCDHAC1         | 0.05 | -4.19  | 0.00 |
| ENSG00000270055 | AC127502        | 0.54 | -0.88  | 0.00 |
| ENSG00000172638 | EFEMP2          | 0.65 | -0.61  | 0.00 |
| ENSG00000007384 | RHBDF1          | 0.63 | -0.67  | 0.00 |
| ENSG00000138439 | FAM117B         | 0.64 | -0.63  | 0.00 |
| ENSG00000176208 | ATAD5           | 0.62 | -0.68  | 0.00 |
| ENSG00000167397 | VKORC1          | 0.74 | -0.43  | 0.00 |
| ENSG00000114805 | PLCH1           | 0.65 | -0.63  | 0.00 |
| ENSG00000167740 | CYB5D2          | 0.75 | -0.42  | 0.00 |
| ENSG00000119636 | BBOF1           | 0.42 | -1.25  | 0.00 |
| ENSG00000189127 | ANKRD34B        | 0.16 | -2.67  | 0.00 |
| ENSG00000165507 | DEPP1           | 0.74 | -0.44  | 0.00 |
| ENSG00000144278 | GALNT13         | 0.68 | -0.55  | 0.00 |
| ENSG00000133739 | LRRCC1          | 0.52 | -0.95  | 0.00 |
| ENSG00000034533 | ASTE1           | 0.65 | -0.63  | 0.00 |
| ENSG00000172201 | ID4             | 0.00 | -9.05  | 0.00 |
| ENSG00000123975 | CKS2            | 0.82 | -0.29  | 0.00 |
| ENSG00000073008 | PVR             | 0.76 | -0.40  | 0.00 |
| ENSG00000131591 | C1orf159        | 0.68 | -0.55  | 0.00 |
| ENSG00000112039 | FANCE           | 0.67 | -0.57  | 0.00 |
| ENSG00000146576 | C7orf26         | 0.71 | -0.49  | 0.00 |
| ENSG00000130803 | ZNF317          | 0.76 | -0.40  | 0.00 |
| ENSG00000133195 | SLC39A11        | 0.76 | -0.39  | 0.00 |
| ENSG00000101974 | ATP11C          | 0.77 | -0.38  | 0.00 |
| ENSG00000168765 | GSTM4           | 0.61 | -0.72  | 0.00 |
| ENSG00000248763 | AC111000        | 0.26 | -1.95  | 0.00 |
| ENSG00000128512 | DOCK4           | 0.77 | -0.38  | 0.00 |
| ENSG00000157343 | ARMC12          | 0.00 | -10.52 | 0.00 |
| ENSG00000159674 | SPON2           | 0.33 | -1.62  | 0.00 |
| ENSG00000135144 | DTX1            | 0.17 | -2.53  | 0.00 |
| ENSG00000280206 | AC026401        | 0.61 | -0.72  | 0.00 |
| ENSG00000009830 | POMT2           | 0.77 | -0.38  | 0.00 |
| ENSG00000002586 | CD99            | 0.79 | -0.35  | 0.00 |
| ENSG00000075886 | TUBA3D          | 0.18 | -2.46  | 0.00 |
| ENSG00000254996 | ANKHD1-EIF4EBP3 | 0.77 | -0.38  | 0.00 |
| ENSG00000124831 | LRRFIP1         | 0.81 | -0.30  | 0.00 |
| ENSG00000165156 | ZHX1            | 0.57 | -0.81  | 0.00 |
| ENSG00000151233 | GXYLT1          | 0.73 | -0.45  | 0.00 |
| ENSG00000257621 | PSMA3-AS1       | 0.67 | -0.58  | 0.00 |
| ENSG00000238103 | RPL9P7          | 0.76 | -0.39  | 0.00 |
| ENSG00000156136 | DCK             | 0.80 | -0.32  | 0.00 |
| ENSG00000100997 | ABHD12          | 0.74 | -0.43  | 0.00 |
| ENSG00000135643 | KCNMB4          | 0.45 | -1.17  | 0.00 |
| ENSG00000165795 | NDRG2           | 0.37 | -1.43  | 0.00 |
| ENSG00000204851 | PNMA8B          | 0.37 | -1.44  | 0.00 |
| ENSG00000198925 | ATG9A           | 0.75 | -0.42  | 0.00 |
| ENSG00000244257 | PKD1P1          | 0.77 | -0.38  | 0.00 |
| ENSG00000196562 | SULF2           | 0.37 | -1.43  | 0.00 |
| ENSG00000185986 | SDHAP3          | 0.42 | -1.27  | 0.00 |
| ENSG00000278771 | RN7SL3          | 0.08 | -3.66  | 0.00 |

|                 |           |      |        |      |
|-----------------|-----------|------|--------|------|
| ENSG00000174669 | SLC29A2   | 0.26 | -1.93  | 0.00 |
| ENSG00000236064 | AL109946  | 0.16 | -2.69  | 0.00 |
| ENSG00000132424 | PNISR     | 0.78 | -0.36  | 0.00 |
| ENSG00000267480 | AP001542  | 0.41 | -1.28  | 0.00 |
| ENSG00000133424 | LARGE1    | 0.28 | -1.86  | 0.00 |
| ENSG00000205250 | E2F4      | 0.79 | -0.34  | 0.00 |
| ENSG00000165406 | MARCF8    | 0.73 | -0.46  | 0.00 |
| ENSG00000138688 | KIAA1109  | 0.70 | -0.51  | 0.00 |
| ENSG00000115486 | GGCX      | 0.82 | -0.29  | 0.00 |
| ENSG00000152939 | MARVELD2  | 0.59 | -0.77  | 0.00 |
| ENSG00000173898 | SPTBN2    | 0.29 | -1.80  | 0.00 |
| ENSG00000159685 | CHCHD6    | 0.78 | -0.37  | 0.00 |
| ENSG00000181929 | PRKAG1    | 0.81 | -0.30  | 0.00 |
| ENSG00000078369 | GNB1      | 0.84 | -0.25  | 0.00 |
| ENSG00000141753 | IGFBP4    | 0.61 | -0.71  | 0.00 |
| ENSG00000101290 | CDS2      | 0.81 | -0.30  | 0.00 |
| ENSG00000228791 | THRB-AS1  | 0.00 | -8.23  | 0.00 |
| ENSG00000105647 | PIK3R2    | 0.69 | -0.53  | 0.00 |
| ENSG00000163697 | APBB2     | 0.82 | -0.28  | 0.00 |
| ENSG00000030419 | IKZF2     | 0.41 | -1.28  | 0.00 |
| ENSG00000143797 | MBOAT2    | 0.78 | -0.36  | 0.00 |
| ENSG00000206341 | HLA-H     | 0.53 | -0.92  | 0.00 |
| ENSG00000204764 | RANBP17   | 0.60 | -0.74  | 0.00 |
| ENSG00000074755 | ZZEF1     | 0.82 | -0.28  | 0.00 |
| ENSG00000198353 | HOXC4     | 0.23 | -2.12  | 0.00 |
| ENSG00000175265 | GOLGA8A   | 0.62 | -0.69  | 0.00 |
| ENSG00000198331 | HYLS1     | 0.67 | -0.58  | 0.00 |
| ENSG00000150687 | PRSS23    | 0.58 | -0.80  | 0.00 |
| ENSG00000116199 | FAM20B    | 0.82 | -0.28  | 0.00 |
| ENSG00000179456 | ZBTB18    | 0.78 | -0.36  | 0.00 |
| ENSG00000184992 | BRI3BP    | 0.76 | -0.40  | 0.00 |
| ENSG00000103319 | EEF2K     | 0.81 | -0.31  | 0.00 |
| ENSG00000176387 | HSD11B2   | 0.19 | -2.37  | 0.00 |
| ENSG00000198162 | MAN1A2    | 0.81 | -0.30  | 0.00 |
| ENSG00000276772 | AC025271  | 0.00 | -10.24 | 0.00 |
| ENSG00000284048 | AC073111  | 0.21 | -2.27  | 0.00 |
| ENSG00000204624 | DISP3     | 0.00 | -8.27  | 0.00 |
| ENSG00000284308 | C2orf81   | 0.37 | -1.45  | 0.00 |
| ENSG00000169710 | FASN      | 0.84 | -0.25  | 0.00 |
| ENSG00000125817 | CENPB     | 0.83 | -0.26  | 0.00 |
| ENSG00000176714 | CCDC121   | 0.35 | -1.50  | 0.01 |
| ENSG00000092096 | SLC22A17  | 0.38 | -1.39  | 0.01 |
| ENSG00000139178 | C1RL      | 0.77 | -0.38  | 0.01 |
| ENSG00000178921 | PEAS      | 0.78 | -0.36  | 0.01 |
| ENSG00000075624 | ACTB      | 0.78 | -0.37  | 0.01 |
| ENSG00000164929 | BAALC     | 0.38 | -1.41  | 0.01 |
| ENSG00000178977 | LINC00324 | 0.15 | -2.72  | 0.01 |
| ENSG00000155957 | TMBIM4    | 0.74 | -0.43  | 0.01 |
| ENSG00000152404 | CWF19L2   | 0.57 | -0.81  | 0.01 |
| ENSG00000182054 | IDH2      | 0.82 | -0.29  | 0.01 |
| ENSG00000159214 | CCDC24    | 0.60 | -0.73  | 0.01 |
| ENSG00000119938 | PPP1R3C   | 0.66 | -0.60  | 0.01 |
| ENSG00000205078 | SYCE1L    | 0.53 | -0.91  | 0.01 |
| ENSG00000123636 | BAZ2B     | 0.72 | -0.48  | 0.01 |
| ENSG00000169760 | NLGN1     | 0.38 | -1.40  | 0.01 |
| ENSG00000111679 | PTPN6     | 0.76 | -0.39  | 0.01 |
| ENSG00000120756 | PLS1      | 0.67 | -0.59  | 0.01 |
| ENSG00000106991 | ENG       | 0.83 | -0.27  | 0.01 |
| ENSG00000132376 | INPP5K    | 0.78 | -0.36  | 0.01 |
| ENSG00000030066 | NUP160    | 0.82 | -0.29  | 0.01 |
| ENSG00000171056 | SOX7      | 0.00 | -9.16  | 0.01 |

|                 |           |      |        |      |
|-----------------|-----------|------|--------|------|
| ENSG00000173557 | FAM166C   | 0.00 | -9.52  | 0.01 |
| ENSG00000164096 | C4orf3    | 0.82 | -0.29  | 0.01 |
| ENSG00000088387 | DOCK9     | 0.77 | -0.39  | 0.01 |
| ENSG00000183763 | TRAIP     | 0.63 | -0.67  | 0.01 |
| ENSG00000114423 | CBLB      | 0.69 | -0.55  | 0.01 |
| ENSG00000124788 | ATXN1     | 0.70 | -0.51  | 0.01 |
| ENSG00000249437 | NAIP      | 0.44 | -1.20  | 0.01 |
| ENSG00000171877 | FRMD5     | 0.49 | -1.02  | 0.01 |
| ENSG00000162913 | OBSCN-AS1 | 0.43 | -1.22  | 0.01 |
| ENSG00000187164 | SHTN1     | 0.78 | -0.36  | 0.01 |
| ENSG00000117868 | ESYT2     | 0.83 | -0.27  | 0.01 |
| ENSG00000033170 | FUT8      | 0.71 | -0.49  | 0.01 |
| ENSG00000176915 | ANKLE2    | 0.84 | -0.26  | 0.01 |
| ENSG00000135378 | PRRG4     | 0.61 | -0.72  | 0.01 |
| ENSG00000065717 | TLE2      | 0.17 | -2.54  | 0.01 |
| ENSG00000177463 | NR2C2     | 0.81 | -0.30  | 0.01 |
| ENSG00000259250 | AC018904  | 0.12 | -3.09  | 0.01 |
| ENSG00000164307 | ERAP1     | 0.72 | -0.47  | 0.01 |
| ENSG00000201185 | RNA5SP202 | 0.03 | -4.99  | 0.01 |
| ENSG00000176095 | IP6K1     | 0.81 | -0.30  | 0.01 |
| ENSG00000256663 | AC112777  | 0.62 | -0.69  | 0.01 |
| ENSG00000263956 | NBPF11    | 0.71 | -0.49  | 0.01 |
| ENSG00000165821 | SALL2     | 0.72 | -0.48  | 0.01 |
| ENSG00000066777 | ARFGEF1   | 0.78 | -0.35  | 0.01 |
| ENSG00000140153 | WDR20     | 0.56 | -0.84  | 0.01 |
| ENSG00000173638 | SLC19A1   | 0.79 | -0.33  | 0.01 |
| ENSG00000130177 | CDC16     | 0.82 | -0.29  | 0.01 |
| ENSG00000178814 | OPLAH     | 0.58 | -0.78  | 0.01 |
| ENSG00000121289 | CEP89     | 0.77 | -0.37  | 0.01 |
| ENSG00000145284 | SCD5      | 0.75 | -0.42  | 0.01 |
| ENSG00000178761 | FAM219B   | 0.59 | -0.76  | 0.01 |
| ENSG00000162946 | DISC1     | 0.73 | -0.45  | 0.01 |
| ENSG00000078687 | TNRC6C    | 0.34 | -1.55  | 0.01 |
| ENSG00000175029 | CTBP2     | 0.76 | -0.40  | 0.01 |
| ENSG00000279094 | LINC01670 | 0.00 | -10.94 | 0.01 |
| ENSG00000279348 | AC012513  | 0.54 | -0.90  | 0.01 |
| ENSG00000128050 | PAICS     | 0.67 | -0.58  | 0.01 |
| ENSG00000058673 | ZC3H11A   | 0.75 | -0.41  | 0.01 |
| ENSG00000099622 | CIRBP     | 0.80 | -0.33  | 0.01 |
| ENSG00000173272 | MZT2A     | 0.79 | -0.35  | 0.01 |
| ENSG00000048649 | RSF1      | 0.75 | -0.41  | 0.01 |
| ENSG00000080298 | REF3      | 0.63 | -0.66  | 0.01 |
| ENSG00000135837 | CEP350    | 0.76 | -0.40  | 0.01 |
| ENSG00000099917 | MED15     | 0.81 | -0.31  | 0.01 |
| ENSG00000176771 | NCKAP5    | 0.41 | -1.30  | 0.01 |
| ENSG00000109738 | GLRB      | 0.64 | -0.65  | 0.01 |
| ENSG00000163635 | ATXN7     | 0.60 | -0.73  | 0.01 |
| ENSG00000157540 | DYRK1A    | 0.66 | -0.61  | 0.01 |
| ENSG00000181826 | RELL1     | 0.74 | -0.43  | 0.01 |
| ENSG00000136856 | SLC2A8    | 0.68 | -0.56  | 0.01 |
| ENSG00000112699 | GMD5      | 0.62 | -0.69  | 0.01 |
| ENSG00000095015 | MAP3K1    | 0.71 | -0.49  | 0.01 |
| ENSG00000184216 | IRAK1     | 0.85 | -0.23  | 0.01 |
| ENSG00000108479 | GALK1     | 0.76 | -0.40  | 0.01 |
| ENSG00000284946 | AC068831  | 0.60 | -0.73  | 0.01 |
| ENSG00000177200 | CHD9      | 0.74 | -0.43  | 0.01 |
| ENSG00000132744 | ACY3      | 0.00 | -10.38 | 0.01 |
| ENSG00000112499 | SLC22A2   | 0.00 | -8.27  | 0.01 |
| ENSG00000261594 | TPBGL     | 0.00 | -9.39  | 0.01 |
| ENSG00000167130 | DOLPP1    | 0.74 | -0.43  | 0.01 |
| ENSG00000196136 | SERPINA3  | 0.00 | -9.13  | 0.01 |

|                 |           |      |        |      |
|-----------------|-----------|------|--------|------|
| ENSG00000058063 | ATP11B    | 0.81 | -0.31  | 0.01 |
| ENSG00000279177 | CTBP2P9   | 0.36 | -1.45  | 0.01 |
| ENSG00000185158 | LRRC37B   | 0.60 | -0.73  | 0.01 |
| ENSG00000080503 | SMARCA2   | 0.81 | -0.30  | 0.01 |
| ENSG00000171446 | KRT27     | 0.18 | -2.47  | 0.01 |
| ENSG00000099953 | MMP11     | 0.16 | -2.63  | 0.01 |
| ENSG00000115548 | KDM3A     | 0.79 | -0.33  | 0.01 |
| ENSG00000150867 | PIP4K2A   | 0.82 | -0.29  | 0.01 |
| ENSG00000083444 | PLOD1     | 0.86 | -0.22  | 0.01 |
| ENSG00000144199 | FAHD2B    | 0.55 | -0.86  | 0.01 |
| ENSG00000168591 | TMUB2     | 0.76 | -0.40  | 0.01 |
| ENSG00000124422 | USP22     | 0.85 | -0.24  | 0.01 |
| ENSG00000267561 | AC093155  | 0.00 | -9.80  | 0.01 |
| ENSG00000120942 | UBIAD1    | 0.80 | -0.33  | 0.01 |
| ENSG00000164535 | DAGLB     | 0.74 | -0.43  | 0.01 |
| ENSG00000117528 | ABCD3     | 0.75 | -0.41  | 0.01 |
| ENSG00000269026 | AC003006  | 0.00 | -11.16 | 0.01 |
| ENSG00000287146 | AC000085  | 0.00 | -11.14 | 0.01 |
| ENSG00000196588 | MRTEFA    | 0.81 | -0.31  | 0.01 |
| ENSG00000077044 | DGKD      | 0.82 | -0.28  | 0.01 |
| ENSG00000146063 | TRIM41    | 0.81 | -0.31  | 0.01 |
| ENSG00000160446 | ZDHHC12   | 0.78 | -0.36  | 0.01 |
| ENSG00000104219 | ZDHHC2    | 0.80 | -0.33  | 0.01 |
| ENSG00000079739 | PGM1      | 0.85 | -0.23  | 0.01 |
| ENSG00000179195 | ZNF664    | 0.22 | -2.20  | 0.01 |
| ENSG00000095713 | CRTAC1    | 0.00 | -9.01  | 0.01 |
| ENSG00000130943 | PKDREJ    | 0.00 | -7.87  | 0.01 |
| ENSG00000141026 | MED9      | 0.70 | -0.51  | 0.01 |
| ENSG00000149179 | C11orf49  | 0.75 | -0.41  | 0.01 |
| ENSG00000196911 | KPNA5     | 0.54 | -0.89  | 0.01 |
| ENSG00000160199 | PKNOX1    | 0.71 | -0.50  | 0.01 |
| ENSG00000230426 | LINC01036 | 0.52 | -0.94  | 0.01 |
| ENSG00000082996 | RNF13     | 0.59 | -0.76  | 0.01 |
| ENSG00000109680 | TBC1D19   | 0.66 | -0.60  | 0.01 |
| ENSG00000251003 | ZFPM2-AS1 | 0.65 | -0.63  | 0.01 |
| ENSG00000259209 | AC004943  | 0.01 | -6.76  | 0.01 |
| ENSG00000156414 | TDRD9     | 0.72 | -0.47  | 0.01 |
| ENSG00000225230 | AC008937  | 0.00 | -11.02 | 0.01 |
| ENSG00000124789 | NUP153    | 0.80 | -0.31  | 0.01 |
| ENSG00000133116 | KL        | 0.14 | -2.83  | 0.01 |
| ENSG00000174799 | CEP135    | 0.60 | -0.74  | 0.01 |
| ENSG00000148341 | SH3GLB2   | 0.75 | -0.41  | 0.01 |
| ENSG00000147471 | PLPBP     | 0.78 | -0.35  | 0.01 |
| ENSG00000144647 | POMGNT2   | 0.75 | -0.41  | 0.01 |
| ENSG00000284879 | AC133644  | 0.56 | -0.84  | 0.01 |
| ENSG00000143178 | TBX19     | 0.57 | -0.80  | 0.01 |
| ENSG00000180035 | ZNF48     | 0.75 | -0.42  | 0.01 |
| ENSG00000143970 | ASXL2     | 0.77 | -0.37  | 0.01 |
| ENSG00000136213 | CHST12    | 0.78 | -0.35  | 0.01 |
| ENSG00000269968 | AC006064  | 0.00 | -8.47  | 0.01 |
| ENSG00000188807 | TMEM201   | 0.72 | -0.47  | 0.01 |
| ENSG00000275322 | AC103746  | 0.38 | -1.39  | 0.01 |
| ENSG00000100167 | SEPTIN3   | 0.05 | -4.19  | 0.01 |
| ENSG00000112530 | PACRG     | 0.10 | -3.32  | 0.01 |
| ENSG00000271880 | AGAP11    | 0.09 | -3.51  | 0.01 |
| ENSG00000213859 | KCTD11    | 0.76 | -0.40  | 0.01 |
| ENSG00000187840 | EIF4EBP1  | 0.84 | -0.24  | 0.01 |
| ENSG00000198055 | GRK6      | 0.81 | -0.31  | 0.01 |
| ENSG00000128602 | SMO       | 0.84 | -0.26  | 0.01 |
| ENSG00000181754 | AMIGO1    | 0.37 | -1.42  | 0.01 |
| ENSG00000214114 | MYCBP     | 0.78 | -0.37  | 0.01 |

|                 |            |      |        |      |
|-----------------|------------|------|--------|------|
| ENSG00000164828 | SUN1       | 0.85 | -0.24  | 0.01 |
| ENSG00000130844 | ZNF331     | 0.34 | -1.56  | 0.01 |
| ENSG00000114268 | PFKFB4     | 0.75 | -0.41  | 0.01 |
| ENSG00000129158 | SERGEF     | 0.70 | -0.52  | 0.01 |
| ENSG00000011021 | CLCN6      | 0.64 | -0.65  | 0.01 |
| ENSG00000187726 | DNAJB13    | 0.45 | -1.14  | 0.01 |
| ENSG00000249859 | PVT1       | 0.72 | -0.48  | 0.01 |
| ENSG00000159363 | ATP13A2    | 0.77 | -0.39  | 0.01 |
| ENSG00000164125 | GASK1B     | 0.80 | -0.32  | 0.01 |
| ENSG00000236088 | COX10-AS1  | 0.40 | -1.34  | 0.01 |
| ENSG00000082781 | ITGB5      | 0.84 | -0.25  | 0.01 |
| ENSG00000182858 | ALG12      | 0.78 | -0.36  | 0.01 |
| ENSG00000107890 | ANKRD26    | 0.63 | -0.67  | 0.01 |
| ENSG00000005108 | THSD7A     | 0.35 | -1.53  | 0.01 |
| ENSG00000170759 | KIF5B      | 0.81 | -0.31  | 0.01 |
| ENSG00000214940 | NPIPA8     | 0.65 | -0.63  | 0.01 |
| ENSG00000149292 | TTC12      | 0.63 | -0.66  | 0.01 |
| ENSG00000182272 | B4GALNT4   | 0.52 | -0.95  | 0.01 |
| ENSG00000171155 | C1GALT1C1  | 0.80 | -0.33  | 0.01 |
| ENSG00000024526 | DEPDC1     | 0.66 | -0.59  | 0.01 |
| ENSG00000147535 | PLPP5      | 0.70 | -0.51  | 0.01 |
| ENSG00000110318 | CEP126     | 0.68 | -0.55  | 0.01 |
| ENSG00000164402 | SEPTIN8    | 0.80 | -0.32  | 0.01 |
| ENSG00000143457 | GOLPH3L    | 0.80 | -0.32  | 0.01 |
| ENSG00000100697 | DICER1     | 0.73 | -0.44  | 0.01 |
| ENSG00000184005 | ST6GALNAC3 | 0.45 | -1.15  | 0.01 |
| ENSG00000185046 | ANKS1B     | 0.39 | -1.36  | 0.01 |
| ENSG00000273038 | AL365203   | 0.56 | -0.82  | 0.01 |
| ENSG00000100505 | TRIM9      | 0.61 | -0.70  | 0.01 |
| ENSG00000213390 | ARHGAP19   | 0.72 | -0.47  | 0.01 |
| ENSG00000164989 | CCDC171    | 0.41 | -1.29  | 0.01 |
| ENSG00000186352 | ANKRD37    | 0.50 | -0.99  | 0.01 |
| ENSG00000205309 | NT5M       | 0.26 | -1.92  | 0.01 |
| ENSG00000106771 | TMEM245    | 0.84 | -0.26  | 0.01 |
| ENSG00000107281 | NPDC1      | 0.67 | -0.58  | 0.01 |
| ENSG00000165516 | KLHDC2     | 0.70 | -0.52  | 0.01 |
| ENSG00000219545 | UMAD1      | 0.68 | -0.57  | 0.01 |
| ENSG00000107902 | LHPP       | 0.67 | -0.58  | 0.01 |
| ENSG00000125968 | ID1        | 0.80 | -0.33  | 0.01 |
| ENSG00000249363 | AC011411   | 0.00 | -11.03 | 0.01 |
| ENSG00000090776 | EFNB1      | 0.64 | -0.64  | 0.01 |
| ENSG00000245662 | LINC02211  | 0.20 | -2.32  | 0.01 |
| ENSG00000130856 | ZNF236     | 0.71 | -0.49  | 0.01 |
| ENSG00000129007 | CALML4     | 0.54 | -0.90  | 0.01 |
| ENSG00000196275 | GTF2IRD2   | 0.63 | -0.66  | 0.01 |
| ENSG00000141668 | CBLN2      | 0.09 | -3.54  | 0.01 |
| ENSG00000111450 | STX2       | 0.79 | -0.35  | 0.01 |
| ENSG00000122420 | PTGFR      | 0.63 | -0.67  | 0.01 |
| ENSG0000012983  | MAP4K5     | 0.79 | -0.34  | 0.01 |
| ENSG00000143924 | EML4       | 0.82 | -0.28  | 0.01 |
| ENSG00000152380 | FAM151B    | 0.33 | -1.60  | 0.01 |
| ENSG00000176619 | LMNB2      | 0.85 | -0.24  | 0.01 |
| ENSG00000128731 | HERC2      | 0.83 | -0.28  | 0.01 |
| ENSG00000173064 | HECTD4     | 0.82 | -0.29  | 0.01 |
| ENSG00000121310 | ECHDC2     | 0.79 | -0.33  | 0.01 |
| ENSG00000161920 | MED11      | 0.66 | -0.59  | 0.01 |
| ENSG00000125629 | INSIG2     | 0.66 | -0.61  | 0.01 |
| ENSG00000137161 | CNPY3      | 0.82 | -0.29  | 0.01 |
| ENSG00000197332 | AC008543   | 0.02 | -5.41  | 0.01 |
| ENSG00000267980 | AC007292   | 0.14 | -2.85  | 0.01 |
| ENSG00000147536 | GINS4      | 0.82 | -0.29  | 0.01 |



|                 |               |      |        |      |
|-----------------|---------------|------|--------|------|
| ENSG00000102144 | PGK1          | 0.84 | -0.25  | 0.01 |
| ENSG00000170004 | CHD3          | 0.84 | -0.24  | 0.01 |
| ENSG00000168758 | SEMA4C        | 0.69 | -0.53  | 0.01 |
| ENSG00000125124 | BBS2          | 0.79 | -0.34  | 0.01 |
| ENSG00000109066 | TMEM104       | 0.84 | -0.26  | 0.01 |
| ENSG00000177853 | ZNF518A       | 0.64 | -0.63  | 0.01 |
| ENSG00000166507 | NDST2         | 0.67 | -0.59  | 0.01 |
| ENSG00000138434 | ITPRID2       | 0.78 | -0.35  | 0.01 |
| ENSG00000118689 | FOXO3         | 0.80 | -0.32  | 0.01 |
| ENSG00000157322 | CLEC18A       | 0.21 | -2.27  | 0.01 |
| ENSG00000236008 | LINC01814     | 0.30 | -1.74  | 0.01 |
| ENSG00000109606 | DHX15         | 0.84 | -0.25  | 0.01 |
| ENSG00000153107 | ANAPC1        | 0.84 | -0.24  | 0.01 |
| ENSG00000119574 | ZBTB45        | 0.74 | -0.44  | 0.01 |
| ENSG00000184838 | PRR16         | 0.37 | -1.43  | 0.01 |
| ENSG00000103197 | TSC2          | 0.83 | -0.27  | 0.01 |
| ENSG00000274419 | TBC1D3D       | 0.67 | -0.58  | 0.01 |
| ENSG00000050438 | SLC4A8        | 0.29 | -1.78  | 0.01 |
| ENSG00000137496 | IL18BP        | 0.64 | -0.65  | 0.01 |
| ENSG00000171659 | GPR34         | 0.00 | -9.90  | 0.01 |
| ENSG00000157456 | CCNB2         | 0.80 | -0.33  | 0.01 |
| ENSG00000168038 | ULK4          | 0.66 | -0.61  | 0.01 |
| ENSG00000180530 | NRIP1         | 0.82 | -0.29  | 0.01 |
| ENSG00000085224 | ATRX          | 0.65 | -0.61  | 0.01 |
| ENSG00000261578 | AP003119      | 0.40 | -1.31  | 0.01 |
| ENSG00000116273 | PHF13         | 0.82 | -0.29  | 0.01 |
| ENSG00000213599 | SLX1A-SULT1A3 | 0.67 | -0.58  | 0.01 |
| ENSG00000135324 | MRAP2         | 0.42 | -1.24  | 0.01 |
| ENSG00000238083 | LRRC37A2      | 0.70 | -0.52  | 0.01 |
| ENSG00000270087 | AC010997      | 0.00 | -11.42 | 0.01 |
| ENSG00000158966 | CACHD1        | 0.66 | -0.59  | 0.01 |
| ENSG00000083720 | OXCT1         | 0.77 | -0.37  | 0.01 |
| ENSG00000136828 | RALGPS1       | 0.28 | -1.84  | 0.01 |
| ENSG00000152520 | PAN3          | 0.77 | -0.37  | 0.01 |
| ENSG00000136051 | WASHC4        | 0.73 | -0.45  | 0.01 |
| ENSG00000260804 | LINC01963     | 0.62 | -0.68  | 0.01 |
| ENSG00000164105 | SAP30         | 0.69 | -0.54  | 0.01 |
| ENSG00000100583 | SAMD15        | 0.44 | -1.19  | 0.01 |
| ENSG00000090975 | PITPNM2       | 0.77 | -0.37  | 0.01 |
| ENSG00000148200 | NR6A1         | 0.48 | -1.05  | 0.01 |
| ENSG00000139324 | TMTC3         | 0.76 | -0.40  | 0.01 |
| ENSG00000157833 | GAREM2        | 0.65 | -0.63  | 0.01 |
| ENSG00000172057 | ORMDL3        | 0.83 | -0.27  | 0.01 |
| ENSG00000138376 | BARD1         | 0.64 | -0.64  | 0.01 |
| ENSG00000113569 | NUP155        | 0.82 | -0.29  | 0.01 |
| ENSG00000120616 | EPC1          | 0.70 | -0.52  | 0.01 |
| ENSG00000155229 | MMS19         | 0.84 | -0.25  | 0.01 |
| ENSG00000137507 | LRRC32        | 0.07 | -3.89  | 0.01 |
| ENSG00000090238 | YPEL3         | 0.72 | -0.48  | 0.01 |
| ENSG00000197818 | SLC9A8        | 0.78 | -0.35  | 0.01 |
| ENSG00000225420 | AC104134      | 0.00 | -10.07 | 0.01 |
| ENSG00000286056 | AC008055      | 0.00 | -9.46  | 0.01 |
| ENSG00000163736 | PPBP          | 0.00 | -10.27 | 0.01 |
| ENSG00000127329 | PTPRB         | 0.76 | -0.39  | 0.01 |
| ENSG00000168743 | NPNT          | 0.22 | -2.16  | 0.01 |
| ENSG00000122783 | CYREN         | 0.81 | -0.30  | 0.01 |
| ENSG00000152785 | BMP3          | 0.00 | -8.05  | 0.01 |
| ENSG00000231674 | LINC00410     | 0.00 | -9.64  | 0.01 |
| ENSG00000179841 | AKAP5         | 0.20 | -2.33  | 0.01 |
| ENSG00000106927 | AMBP          | 0.54 | -0.89  | 0.01 |
| ENSG00000197705 | KLHL14        | 0.00 | -8.40  | 0.01 |

|                 |           |      |        |      |
|-----------------|-----------|------|--------|------|
| ENSG00000238105 | GOLGA2P5  | 0.38 | -1.38  | 0.01 |
| ENSG00000180573 | H2AC6     | 0.54 | -0.90  | 0.01 |
| ENSG00000099326 | MZF1      | 0.78 | -0.36  | 0.01 |
| ENSG00000167775 | CD320     | 0.81 | -0.30  | 0.01 |
| ENSG00000105325 | FZR1      | 0.73 | -0.46  | 0.01 |
| ENSG00000148730 | EIF4EBP2  | 0.84 | -0.26  | 0.01 |
| ENSG00000164118 | CEP44     | 0.64 | -0.65  | 0.01 |
| ENSG00000148824 | MTG1      | 0.78 | -0.35  | 0.01 |
| ENSG00000151287 | TEX30     | 0.71 | -0.50  | 0.01 |
| ENSG00000111305 | GSG1      | 0.00 | -9.14  | 0.01 |
| ENSG00000164953 | TMEM67    | 0.68 | -0.55  | 0.01 |
| ENSG00000255389 | Z97989    | 0.22 | -2.19  | 0.01 |
| ENSG00000139160 | ETFBKMT   | 0.33 | -1.62  | 0.01 |
| ENSG00000101222 | SPEF1     | 0.06 | -4.08  | 0.01 |
| ENSG00000277531 | PNMA8C    | 0.10 | -3.31  | 0.01 |
| ENSG00000072135 | PTPN18    | 0.71 | -0.49  | 0.01 |
| ENSG00000103510 | KAT8      | 0.80 | -0.32  | 0.01 |
| ENSG00000008277 | ADAM22    | 0.60 | -0.74  | 0.01 |
| ENSG00000164151 | ICE1      | 0.80 | -0.32  | 0.01 |
| ENSG00000182557 | SPNS3     | 0.42 | -1.26  | 0.01 |
| ENSG00000118997 | DNAH7     | 0.40 | -1.33  | 0.01 |
| ENSG00000164961 | WASHC5    | 0.78 | -0.36  | 0.01 |
| ENSG00000163848 | ZNF148    | 0.78 | -0.36  | 0.01 |
| ENSG00000165591 | FAAH2     | 0.06 | -4.07  | 0.01 |
| ENSG00000005882 | PDK2      | 0.76 | -0.39  | 0.01 |
| ENSG00000132004 | FBXW9     | 0.68 | -0.56  | 0.01 |
| ENSG00000095777 | MYO3A     | 0.43 | -1.22  | 0.01 |
| ENSG00000265763 | ZNF488    | 0.15 | -2.71  | 0.01 |
| ENSG00000181788 | SIAH2     | 0.79 | -0.35  | 0.01 |
| ENSG00000147533 | GOLGA7    | 0.75 | -0.41  | 0.01 |
| ENSG00000272333 | KMT2B     | 0.83 | -0.27  | 0.01 |
| ENSG00000161847 | RAVER1    | 0.83 | -0.26  | 0.01 |
| ENSG00000168615 | ADAM9     | 0.84 | -0.25  | 0.01 |
| ENSG00000229743 | LINC01159 | 0.34 | -1.55  | 0.01 |
| ENSG00000115652 | UXS1      | 0.73 | -0.46  | 0.01 |
| ENSG00000110514 | MADD      | 0.83 | -0.27  | 0.01 |
| ENSG00000183793 | NPIPA5    | 0.52 | -0.95  | 0.01 |
| ENSG00000166225 | FRS2      | 0.50 | -1.00  | 0.01 |
| ENSG00000104880 | ARHGEF18  | 0.82 | -0.29  | 0.01 |
| ENSG00000180104 | EXOC3     | 0.84 | -0.25  | 0.01 |
| ENSG00000147485 | PXDNL     | 0.18 | -2.48  | 0.01 |
| ENSG00000132967 | HMGB1P5   | 0.78 | -0.35  | 0.01 |
| ENSG00000135916 | ITM2C     | 0.83 | -0.27  | 0.01 |
| ENSG00000197329 | PEL1      | 0.73 | -0.45  | 0.01 |
| ENSG00000064651 | SLC12A2   | 0.79 | -0.35  | 0.01 |
| ENSG00000254844 | AP000757  | 0.05 | -4.30  | 0.01 |
| ENSG00000177508 | IRX3      | 0.22 | -2.17  | 0.01 |
| ENSG00000276718 | AC005840  | 0.08 | -3.69  | 0.01 |
| ENSG00000169855 | ROBO1     | 0.78 | -0.35  | 0.01 |
| ENSG00000141499 | WRAP53    | 0.76 | -0.39  | 0.01 |
| ENSG00000287896 | AC073548  | 0.00 | -9.49  | 0.01 |
| ENSG00000198513 | ATL1      | 0.63 | -0.66  | 0.01 |
| ENSG00000128159 | TUBGCP6   | 0.76 | -0.39  | 0.01 |
| ENSG00000102554 | KLF5      | 0.62 | -0.70  | 0.01 |
| ENSG00000128581 | IFT22     | 0.76 | -0.39  | 0.01 |
| ENSG00000176697 | BDNF      | 0.72 | -0.47  | 0.01 |
| ENSG00000174586 | ZNF497    | 0.00 | -11.45 | 0.01 |
| ENSG00000196396 | PTPN1     | 0.86 | -0.22  | 0.01 |
| ENSG00000169660 | HEXD      | 0.74 | -0.44  | 0.01 |
| ENSG00000176894 | PXMP2     | 0.74 | -0.43  | 0.01 |
| ENSG00000204842 | ATXN2     | 0.78 | -0.36  | 0.01 |

|                 |          |      |        |      |
|-----------------|----------|------|--------|------|
| ENSG00000125089 | SH3TC1   | 0.70 | -0.52  | 0.01 |
| ENSG00000107625 | DDX50    | 0.74 | -0.44  | 0.01 |
| ENSG00000078967 | UBE2D4   | 0.64 | -0.65  | 0.01 |
| ENSG00000288597 | AC234782 | 0.02 | -5.38  | 0.01 |
| ENSG00000181722 | ZBTB20   | 0.46 | -1.13  | 0.01 |
| ENSG00000153936 | HS2ST1   | 0.83 | -0.27  | 0.01 |
| ENSG00000145675 | PIK3R1   | 0.80 | -0.31  | 0.01 |
| ENSG00000138398 | PPIG     | 0.78 | -0.37  | 0.01 |
| ENSG00000120075 | HOXB5    | 0.68 | -0.55  | 0.01 |
| ENSG00000108840 | HDAC5    | 0.77 | -0.37  | 0.01 |
| ENSG00000150712 | MTMR12   | 0.80 | -0.32  | 0.01 |
| ENSG00000113763 | UNC5A    | 0.08 | -3.56  | 0.01 |
| ENSG00000160051 | IOCC     | 0.62 | -0.68  | 0.01 |
| ENSG00000068489 | PRR11    | 0.86 | -0.22  | 0.01 |
| ENSG00000083642 | PDS5B    | 0.70 | -0.52  | 0.01 |
| ENSG00000146267 | FAXC     | 0.39 | -1.35  | 0.01 |
| ENSG00000205041 | AC118344 | 0.37 | -1.45  | 0.01 |
| ENSG00000224597 | SVIL-AS1 | 0.61 | -0.71  | 0.01 |
| ENSG00000182240 | BACE2    | 0.76 | -0.40  | 0.01 |
| ENSG00000104517 | UBR5     | 0.85 | -0.24  | 0.01 |
| ENSG00000183426 | NPIPA1   | 0.69 | -0.55  | 0.01 |
| ENSG00000132016 | C19orf57 | 0.48 | -1.07  | 0.01 |
| ENSG00000132522 | GPS2     | 0.81 | -0.30  | 0.01 |
| ENSG00000138658 | ZGRF1    | 0.55 | -0.85  | 0.01 |
| ENSG00000168487 | BMP1     | 0.81 | -0.30  | 0.01 |
| ENSG00000254739 | AC137894 | 0.00 | -11.48 | 0.01 |
| ENSG00000187837 | H1-2     | 0.69 | -0.53  | 0.01 |
| ENSG00000154874 | CCDC144B | 0.02 | -5.79  | 0.01 |
| ENSG00000282936 | AC004706 | 0.62 | -0.70  | 0.01 |
| ENSG00000273046 | AC012531 | 0.00 | -11.28 | 0.01 |
| ENSG00000138161 | CUZD1    | 0.04 | -4.75  | 0.01 |
| ENSG00000170515 | PA2G4    | 0.85 | -0.23  | 0.01 |
| ENSG00000102471 | NDFIP2   | 0.75 | -0.42  | 0.01 |
| ENSG00000109787 | KLF3     | 0.83 | -0.27  | 0.01 |
| ENSG00000173890 | GPR160   | 0.54 | -0.90  | 0.01 |
| ENSG00000173531 | MST1     | 0.46 | -1.11  | 0.01 |
| ENSG00000105227 | PRX      | 0.61 | -0.72  | 0.01 |
| ENSG00000145982 | FARS2    | 0.76 | -0.39  | 0.01 |
| ENSG00000213625 | LEPROT   | 0.83 | -0.26  | 0.01 |
| ENSG00000100129 | EIF3L    | 0.84 | -0.25  | 0.01 |
| ENSG00000205129 | C4orf47  | 0.37 | -1.42  | 0.01 |
| ENSG00000028528 | SNX1     | 0.83 | -0.26  | 0.01 |
| ENSG00000135829 | DHX9     | 0.86 | -0.22  | 0.01 |
| ENSG00000204745 | AC083899 | 0.64 | -0.64  | 0.01 |
| ENSG00000161328 | LRRC56   | 0.31 | -1.69  | 0.01 |
| ENSG00000213977 | TAX1BP3  | 0.85 | -0.23  | 0.01 |
| ENSG00000186409 | CCDC30   | 0.48 | -1.06  | 0.01 |
| ENSG00000013441 | CLK1     | 0.78 | -0.36  | 0.01 |
| ENSG00000157212 | PAXIP1   | 0.80 | -0.31  | 0.01 |
| ENSG00000139687 | RB1      | 0.74 | -0.43  | 0.01 |
| ENSG00000134873 | CLDN10   | 0.00 | -9.95  | 0.01 |
| ENSG00000106346 | USP42    | 0.76 | -0.39  | 0.01 |
| ENSG00000286075 | AC009412 | 0.68 | -0.55  | 0.01 |
| ENSG00000106003 | LFNG     | 0.84 | -0.25  | 0.01 |
| ENSG00000198707 | CEP290   | 0.70 | -0.51  | 0.01 |
| ENSG00000188428 | BLOC1S5  | 0.65 | -0.61  | 0.01 |
| ENSG00000102893 | PHKB     | 0.78 | -0.36  | 0.01 |
| ENSG00000119969 | HELLS    | 0.62 | -0.69  | 0.01 |
| ENSG00000180155 | LYNX1    | 0.54 | -0.88  | 0.01 |
| ENSG00000014824 | SLC30A9  | 0.84 | -0.26  | 0.01 |
| ENSG00000162735 | PEX19    | 0.69 | -0.54  | 0.01 |

|                 |            |      |        |      |
|-----------------|------------|------|--------|------|
| ENSG00000138767 | CNOT6L     | 0.77 | -0.38  | 0.01 |
| ENSG00000038002 | AGA        | 0.81 | -0.31  | 0.01 |
| ENSG00000170242 | USP47      | 0.80 | -0.32  | 0.01 |
| ENSG00000164093 | PITX2      | 0.65 | -0.62  | 0.01 |
| ENSG00000173757 | STAT5B     | 0.84 | -0.26  | 0.01 |
| ENSG00000241790 | ENO1P4     | 0.63 | -0.67  | 0.01 |
| ENSG00000144746 | ARL6IP5    | 0.83 | -0.26  | 0.01 |
| ENSG00000280543 | ASAP1-IT2  | 0.00 | -9.63  | 0.01 |
| ENSG00000262823 | AC127521   | 0.00 | -10.47 | 0.01 |
| ENSG00000286724 | AL732509   | 0.33 | -1.60  | 0.01 |
| ENSG00000272273 | IER3-AS1   | 0.00 | -11.49 | 0.01 |
| ENSG00000179094 | PER1       | 0.74 | -0.43  | 0.01 |
| ENSG00000176014 | TUBB6      | 0.75 | -0.42  | 0.01 |
| ENSG00000156466 | GDF6       | 0.25 | -1.97  | 0.01 |
| ENSG00000167774 | AC010323   | 0.60 | -0.73  | 0.01 |
| ENSG00000206530 | CFAP44     | 0.62 | -0.69  | 0.01 |
| ENSG00000254469 | AP002495   | 0.37 | -1.43  | 0.01 |
| ENSG00000134900 | TPP2       | 0.82 | -0.28  | 0.01 |
| ENSG00000168010 | ATG16L2    | 0.61 | -0.71  | 0.01 |
| ENSG00000272870 | SAP30-DT   | 0.32 | -1.66  | 0.01 |
| ENSG00000140538 | NTRK3      | 0.27 | -1.91  | 0.01 |
| ENSG00000108852 | MPP2       | 0.68 | -0.55  | 0.01 |
| ENSG00000185432 | METTL7A    | 0.47 | -1.09  | 0.01 |
| ENSG00000251685 | UGT2B27P   | 0.00 | -9.84  | 0.01 |
| ENSG00000197785 | ATAD3A     | 0.85 | -0.24  | 0.01 |
| ENSG00000156050 | FAM161B    | 0.62 | -0.68  | 0.01 |
| ENSG00000095564 | BTA1       | 0.80 | -0.32  | 0.01 |
| ENSG00000101191 | DIDO1      | 0.85 | -0.23  | 0.01 |
| ENSG00000258749 | AL110504   | 0.44 | -1.19  | 0.01 |
| ENSG00000134138 | MEIS2      | 0.63 | -0.67  | 0.01 |
| ENSG00000197168 | NEK5       | 0.32 | -1.67  | 0.01 |
| ENSG00000106479 | ZNF862     | 0.75 | -0.42  | 0.01 |
| ENSG00000147548 | NSD3       | 0.73 | -0.45  | 0.01 |
| ENSG00000141294 | LRRC46     | 0.49 | -1.04  | 0.01 |
| ENSG00000111271 | ACAD10     | 0.78 | -0.35  | 0.01 |
| ENSG00000198160 | MIER1      | 0.75 | -0.41  | 0.01 |
| ENSG00000164684 | ZNF704     | 0.68 | -0.56  | 0.01 |
| ENSG00000039319 | ZFYVE16    | 0.78 | -0.36  | 0.01 |
| ENSG00000161671 | EMC10      | 0.83 | -0.27  | 0.01 |
| ENSG00000187790 | FANCM      | 0.54 | -0.88  | 0.01 |
| ENSG00000233381 | AK4P3      | 0.38 | -1.41  | 0.01 |
| ENSG00000103494 | RPGRIP1L   | 0.77 | -0.37  | 0.01 |
| ENSG00000113318 | MSH3       | 0.78 | -0.36  | 0.01 |
| ENSG00000071205 | ARHGAP10   | 0.81 | -0.31  | 0.01 |
| ENSG00000187676 | B3GLCT     | 0.73 | -0.46  | 0.01 |
| ENSG00000128789 | PSMG2      | 0.84 | -0.26  | 0.01 |
| ENSG00000084676 | NCOA1      | 0.73 | -0.46  | 0.01 |
| ENSG00000254852 | NPIPA2     | 0.22 | -2.20  | 0.01 |
| ENSG00000145916 | RMND5B     | 0.78 | -0.35  | 0.01 |
| ENSG00000156876 | SASS6      | 0.53 | -0.92  | 0.01 |
| ENSG00000172878 | METAP1D    | 0.74 | -0.43  | 0.01 |
| ENSG00000100307 | CBX7       | 0.64 | -0.65  | 0.01 |
| ENSG00000039139 | DNAH5      | 0.68 | -0.56  | 0.01 |
| ENSG00000228839 | PIK3IP1-DT | 0.00 | -11.32 | 0.01 |
| ENSG00000141699 | RETREG3    | 0.84 | -0.25  | 0.01 |
| ENSG00000171345 | KRT19      | 0.62 | -0.70  | 0.01 |
| ENSG00000259345 | AC013652   | 0.33 | -1.60  | 0.01 |
| ENSG00000163527 | STT3B      | 0.86 | -0.22  | 0.01 |
| ENSG00000031691 | CENPO      | 0.66 | -0.61  | 0.01 |
| ENSG00000150995 | ITPR1      | 0.69 | -0.53  | 0.01 |
| ENSG00000170264 | FAM161A    | 0.60 | -0.74  | 0.01 |

|                 |             |      |        |      |
|-----------------|-------------|------|--------|------|
| ENSG00000134824 | FADS2       | 0.70 | -0.52  | 0.01 |
| ENSG00000130714 | POMT1       | 0.80 | -0.33  | 0.01 |
| ENSG00000078142 | PIK3C3      | 0.78 | -0.35  | 0.01 |
| ENSG00000196912 | ANKRD36B    | 0.49 | -1.01  | 0.01 |
| ENSG00000196632 | WNK3        | 0.56 | -0.84  | 0.01 |
| ENSG00000134852 | CLOCK       | 0.79 | -0.35  | 0.01 |
| ENSG00000123810 | B9D2        | 0.66 | -0.59  | 0.01 |
| ENSG00000072840 | EVC         | 0.86 | -0.22  | 0.01 |
| ENSG00000134222 | PSRC1       | 0.72 | -0.47  | 0.01 |
| ENSG00000108588 | CCDC47      | 0.85 | -0.24  | 0.01 |
| ENSG00000213606 | AKR1B10P1   | 0.05 | -4.39  | 0.01 |
| ENSG00000232040 | ZBED9       | 0.42 | -1.26  | 0.01 |
| ENSG00000272944 | AC079834    | 0.28 | -1.81  | 0.01 |
| ENSG00000136146 | MED4        | 0.79 | -0.34  | 0.01 |
| ENSG00000138074 | SLC5A6      | 0.83 | -0.27  | 0.01 |
| ENSG00000188051 | TMEM221     | 0.00 | -9.31  | 0.01 |
| ENSG00000188452 | CERKL       | 0.39 | -1.36  | 0.01 |
| ENSG00000226887 | ERYMER34-1  | 0.65 | -0.63  | 0.01 |
| ENSG00000213104 | NPM1P46     | 0.00 | -10.85 | 0.01 |
| ENSG00000187240 | DYNC2H1     | 0.61 | -0.71  | 0.01 |
| ENSG00000276805 | AL133216    | 0.53 | -0.93  | 0.01 |
| ENSG00000109610 | SOD3        | 0.54 | -0.88  | 0.01 |
| ENSG00000154146 | NRGN        | 0.66 | -0.59  | 0.01 |
| ENSG00000125246 | CLYBL       | 0.63 | -0.67  | 0.01 |
| ENSG00000106443 | PHF14       | 0.72 | -0.48  | 0.01 |
| ENSG00000162736 | NCSTN       | 0.85 | -0.23  | 0.01 |
| ENSG00000100982 | PCIF1       | 0.83 | -0.28  | 0.02 |
| ENSG00000214753 | HNRNPUL2    | 0.86 | -0.21  | 0.02 |
| ENSG00000122970 | IFT81       | 0.71 | -0.49  | 0.02 |
| ENSG00000077097 | TOP2B       | 0.81 | -0.30  | 0.02 |
| ENSG00000198792 | TMEM184B    | 0.83 | -0.27  | 0.02 |
| ENSG00000109881 | CCDC34      | 0.75 | -0.42  | 0.02 |
| ENSG00000114021 | NIT2        | 0.85 | -0.23  | 0.02 |
| ENSG00000110429 | FBXO3       | 0.75 | -0.41  | 0.02 |
| ENSG00000040341 | STAU2       | 0.81 | -0.31  | 0.02 |
| ENSG00000167646 | DNAAF3      | 0.29 | -1.81  | 0.02 |
| ENSG00000135956 | TMEM127     | 0.85 | -0.24  | 0.02 |
| ENSG00000250251 | PKD1P6      | 0.70 | -0.51  | 0.02 |
| ENSG00000073910 | FRY         | 0.48 | -1.06  | 0.02 |
| ENSG00000274565 | AC080038    | 0.58 | -0.78  | 0.02 |
| ENSG00000138081 | FBXO11      | 0.80 | -0.32  | 0.02 |
| ENSG00000178966 | RMI1        | 0.70 | -0.52  | 0.02 |
| ENSG00000152061 | RABGAP1L    | 0.66 | -0.61  | 0.02 |
| ENSG00000108947 | EFNB3       | 0.33 | -1.60  | 0.02 |
| ENSG00000100478 | AP4S1       | 0.65 | -0.62  | 0.02 |
| ENSG00000160294 | MCM3AP      | 0.83 | -0.26  | 0.02 |
| ENSG00000241973 | PI4KA       | 0.85 | -0.23  | 0.02 |
| ENSG00000181544 | FANCB       | 0.62 | -0.70  | 0.02 |
| ENSG00000125872 | LRRN4       | 0.70 | -0.51  | 0.02 |
| ENSG00000271380 | AL451085    | 0.28 | -1.84  | 0.02 |
| ENSG00000144043 | TEX261      | 0.85 | -0.24  | 0.02 |
| ENSG00000211445 | GPX3        | 0.66 | -0.60  | 0.02 |
| ENSG00000241563 | CORT        | 0.02 | -5.69  | 0.02 |
| ENSG00000175220 | ARHGAP1     | 0.85 | -0.23  | 0.02 |
| ENSG00000136153 | LMO7        | 0.72 | -0.48  | 0.02 |
| ENSG00000203706 | SERTAD4-AS1 | 0.63 | -0.66  | 0.02 |
| ENSG00000100320 | RBFOX2      | 0.86 | -0.22  | 0.02 |
| ENSG00000260233 | ZNRD2-AS1   | 0.45 | -1.15  | 0.02 |
| ENSG00000105879 | CBLL1       | 0.57 | -0.81  | 0.02 |
| ENSG00000171241 | SHCBP1      | 0.83 | -0.26  | 0.02 |
| ENSG00000225205 | AC078883    | 0.38 | -1.41  | 0.02 |

|                 |           |      |        |      |
|-----------------|-----------|------|--------|------|
| ENSG00000144567 | RETREG2   | 0.76 | -0.40  | 0.02 |
| ENSG00000188747 | NOXA1     | 0.00 | -9.73  | 0.02 |
| ENSG00000114023 | FAM162A   | 0.82 | -0.28  | 0.02 |
| ENSG00000111731 | C2CD5     | 0.76 | -0.39  | 0.02 |
| ENSG00000066027 | PPP2R5A   | 0.80 | -0.32  | 0.02 |
| ENSG00000060749 | OSER1     | 0.68 | -0.56  | 0.02 |
| ENSG00000148737 | TCF7L2    | 0.65 | -0.62  | 0.02 |
| ENSG00000177311 | ZBTB38    | 0.22 | -2.16  | 0.02 |
| ENSG00000163040 | CCDC74A   | 0.74 | -0.44  | 0.02 |
| ENSG00000179029 | TMEM107   | 0.66 | -0.60  | 0.02 |
| ENSG00000048991 | R3HDM1    | 0.84 | -0.26  | 0.02 |
| ENSG00000158545 | ZC3H18    | 0.82 | -0.29  | 0.02 |
| ENSG00000145850 | TIMD4     | 0.53 | -0.92  | 0.02 |
| ENSG00000154678 | PDE1C     | 0.02 | -5.44  | 0.02 |
| ENSG00000118690 | ARMC2     | 0.46 | -1.13  | 0.02 |
| ENSG00000124155 | PIGT      | 0.76 | -0.39  | 0.02 |
| ENSG00000164362 | TERT      | 0.56 | -0.83  | 0.02 |
| ENSG00000135365 | PHF21A    | 0.82 | -0.28  | 0.02 |
| ENSG00000183258 | DDX41     | 0.85 | -0.24  | 0.02 |
| ENSG00000138792 | ENPEP     | 0.59 | -0.75  | 0.02 |
| ENSG00000254389 | RHPN1-AS1 | 0.47 | -1.09  | 0.02 |
| ENSG00000124641 | MED20     | 0.68 | -0.56  | 0.02 |
| ENSG00000269148 | AC092301  | 0.00 | -10.90 | 0.02 |
| ENSG00000287402 | AL158167  | 0.00 | -9.91  | 0.02 |
| ENSG00000198270 | TMEM116   | 0.67 | -0.58  | 0.02 |
| ENSG00000107829 | FBXW4     | 0.82 | -0.29  | 0.02 |
| ENSG00000117298 | ECE1      | 0.87 | -0.20  | 0.02 |
| ENSG00000169562 | GJB1      | 0.00 | -8.45  | 0.02 |
| ENSG00000171757 | LRRC34    | 0.00 | -8.27  | 0.02 |
| ENSG00000215883 | CYB5RL    | 0.64 | -0.63  | 0.02 |
| ENSG00000255874 | PRECSIT   | 0.77 | -0.37  | 0.02 |
| ENSG00000204576 | PRR3      | 0.77 | -0.37  | 0.02 |
| ENSG00000273311 | DGCR11    | 0.64 | -0.63  | 0.02 |
| ENSG00000102904 | TSNAXIP1  | 0.38 | -1.39  | 0.02 |
| ENSG00000076248 | UNG       | 0.84 | -0.26  | 0.02 |
| ENSG00000169302 | STK32A    | 0.46 | -1.13  | 0.02 |
| ENSG00000261794 | GOLGA8H   | 0.14 | -2.84  | 0.02 |
| ENSG00000177640 | CASC2     | 0.45 | -1.14  | 0.02 |
| ENSG00000137337 | MDC1      | 0.81 | -0.31  | 0.02 |
| ENSG00000169446 | MMGT1     | 0.83 | -0.28  | 0.02 |
| ENSG00000132436 | FIGNL1    | 0.64 | -0.65  | 0.02 |
| ENSG00000196693 | ZNF33B    | 0.49 | -1.02  | 0.02 |
| ENSG00000117477 | CCDC181   | 0.60 | -0.75  | 0.02 |
| ENSG00000283378 | CNTNAP3C  | 0.33 | -1.62  | 0.02 |
| ENSG00000146950 | SHROOM2   | 0.45 | -1.16  | 0.02 |
| ENSG00000188176 | SMTNL2    | 0.00 | -9.12  | 0.02 |
| ENSG00000089335 | ZNF302    | 0.62 | -0.68  | 0.02 |
| ENSG00000071537 | SEL1L     | 0.86 | -0.22  | 0.02 |
| ENSG00000144485 | HES6      | 0.43 | -1.21  | 0.02 |
| ENSG00000086200 | IPO11     | 0.81 | -0.30  | 0.02 |
| ENSG00000155629 | PIK3AP1   | 0.74 | -0.43  | 0.02 |
| ENSG00000141905 | NFIC      | 0.77 | -0.37  | 0.02 |
| ENSG00000231426 | FILNC1    | 0.00 | -9.55  | 0.02 |
| ENSG00000102038 | SMARCA1   | 0.84 | -0.25  | 0.02 |
| ENSG00000138769 | CDKL2     | 0.46 | -1.12  | 0.02 |
| ENSG00000139874 | SSTR1     | 0.50 | -1.01  | 0.02 |
| ENSG00000065135 | GNAI3     | 0.83 | -0.26  | 0.02 |
| ENSG00000231584 | FAHD2CP   | 0.32 | -1.63  | 0.02 |
| ENSG00000137822 | TUBGCP4   | 0.79 | -0.34  | 0.02 |
| ENSG00000102977 | ACD       | 0.78 | -0.36  | 0.02 |
| ENSG00000250767 | AC139783  | 0.06 | -4.08  | 0.02 |

|                 |            |      |        |      |
|-----------------|------------|------|--------|------|
| ENSG00000250091 | DNAH10OS   | 0.32 | -1.64  | 0.02 |
| ENSG00000173013 | CCDC96     | 0.72 | -0.48  | 0.02 |
| ENSG00000183346 | CABCOCO1   | 0.31 | -1.67  | 0.02 |
| ENSG00000271167 | LINC01109  | 0.09 | -3.43  | 0.02 |
| ENSG00000070366 | SMG6       | 0.83 | -0.27  | 0.02 |
| ENSG00000184500 | PROS1      | 0.71 | -0.49  | 0.02 |
| ENSG00000230074 | AL162231   | 0.65 | -0.62  | 0.02 |
| ENSG00000144228 | SPOPL      | 0.77 | -0.38  | 0.02 |
| ENSG00000141867 | BRD4       | 0.85 | -0.23  | 0.02 |
| ENSG00000285644 | AC108448   | 0.43 | -1.22  | 0.02 |
| ENSG00000089820 | ARHGAP4    | 0.11 | -3.14  | 0.02 |
| ENSG00000176225 | RTTN       | 0.76 | -0.39  | 0.02 |
| ENSG00000288063 | AC099050   | 0.00 | -9.77  | 0.02 |
| ENSG00000168589 | DYNLRB2    | 0.00 | -9.86  | 0.02 |
| ENSG00000013573 | DDX11      | 0.83 | -0.26  | 0.02 |
| ENSG00000177169 | ULK1       | 0.80 | -0.32  | 0.02 |
| ENSG00000162694 | EXTL2      | 0.70 | -0.52  | 0.02 |
| ENSG00000166183 | ASPG       | 0.00 | -8.00  | 0.02 |
| ENSG00000005302 | MSL3       | 0.81 | -0.31  | 0.02 |
| ENSG00000131507 | NDFIP1     | 0.85 | -0.23  | 0.02 |
| ENSG00000144395 | CCDC150    | 0.56 | -0.84  | 0.02 |
| ENSG00000040608 | RTN4R      | 0.07 | -3.81  | 0.02 |
| ENSG00000196290 | NIF3L1     | 0.79 | -0.34  | 0.02 |
| ENSG00000109458 | GAB1       | 0.72 | -0.48  | 0.02 |
| ENSG00000149657 | LSM14B     | 0.82 | -0.28  | 0.02 |
| ENSG00000267811 | AP001160   | 0.12 | -3.12  | 0.02 |
| ENSG00000127663 | KDM4B      | 0.83 | -0.26  | 0.02 |
| ENSG00000274180 | NATD1      | 0.77 | -0.39  | 0.02 |
| ENSG00000261371 | PECAM1     | 0.32 | -1.66  | 0.02 |
| ENSG00000100442 | FKBP3      | 0.81 | -0.31  | 0.02 |
| ENSG00000269973 | AC010969   | 0.40 | -1.32  | 0.02 |
| ENSG00000230006 | ANKRD36BP2 | 0.32 | -1.66  | 0.02 |
| ENSG00000198176 | TFDP1      | 0.82 | -0.29  | 0.02 |
| ENSG00000177106 | EPS8L2     | 0.85 | -0.24  | 0.02 |
| ENSG00000186501 | TMEM222    | 0.70 | -0.52  | 0.02 |
| ENSG00000183814 | LIN9       | 0.73 | -0.45  | 0.02 |
| ENSG00000213347 | MXD3       | 0.79 | -0.33  | 0.02 |
| ENSG00000099377 | HSD3B7     | 0.75 | -0.42  | 0.02 |
| ENSG00000184903 | IMMP2L     | 0.63 | -0.66  | 0.02 |
| ENSG00000032742 | IFT88      | 0.59 | -0.77  | 0.02 |
| ENSG00000235605 | AL355472   | 0.09 | -3.41  | 0.02 |
| ENSG00000273247 | AC097376   | 0.42 | -1.25  | 0.02 |
| ENSG00000136715 | SAP130     | 0.82 | -0.28  | 0.02 |
| ENSG00000152291 | TGOLN2     | 0.87 | -0.20  | 0.02 |
| ENSG00000164136 | IL15       | 0.65 | -0.63  | 0.02 |
| ENSG00000101138 | CSTF1      | 0.78 | -0.35  | 0.02 |
| ENSG00000064961 | HMG20B     | 0.82 | -0.28  | 0.02 |
| ENSG00000257354 | AC048341   | 0.74 | -0.43  | 0.02 |
| ENSG00000196284 | SUPT3H     | 0.70 | -0.50  | 0.02 |
| ENSG00000125534 | PPDPF      | 0.85 | -0.24  | 0.02 |
| ENSG00000172239 | PAIP1      | 0.82 | -0.28  | 0.02 |
| ENSG00000129219 | PLD2       | 0.83 | -0.27  | 0.02 |
| ENSG00000180739 | S1PR5      | 0.56 | -0.84  | 0.02 |
| ENSG00000064763 | FAR2       | 0.80 | -0.32  | 0.02 |
| ENSG00000279673 | AC092919   | 0.40 | -1.32  | 0.02 |
| ENSG00000107984 | DKK1       | 0.58 | -0.79  | 0.02 |
| ENSG00000100425 | BRD1       | 0.80 | -0.32  | 0.02 |
| ENSG00000229559 | AL353597   | 0.00 | -10.47 | 0.02 |
| ENSG00000275120 | AC048382   | 0.00 | -8.71  | 0.02 |
| ENSG00000197535 | MYO5A      | 0.71 | -0.49  | 0.02 |
| ENSG00000130396 | AEDN       | 0.84 | -0.26  | 0.02 |

|                 |            |      |        |      |
|-----------------|------------|------|--------|------|
| ENSG00000173894 | CBX2       | 0.54 | -0.89  | 0.02 |
| ENSG00000142166 | IFNAR1     | 0.72 | -0.48  | 0.02 |
| ENSG00000162512 | SDC3       | 0.83 | -0.27  | 0.02 |
| ENSG00000124743 | KIHL31     | 0.26 | -1.92  | 0.02 |
| ENSG00000146828 | SLC12A9    | 0.83 | -0.26  | 0.02 |
| ENSG00000243716 | NPIP5      | 0.78 | -0.36  | 0.02 |
| ENSG00000183010 | PYCR1      | 0.71 | -0.49  | 0.02 |
| ENSG00000274092 | AC106739   | 0.37 | -1.45  | 0.02 |
| ENSG00000110696 | C11orf58   | 0.87 | -0.20  | 0.02 |
| ENSG00000115183 | TANC1      | 0.81 | -0.30  | 0.02 |
| ENSG00000130939 | UBE4B      | 0.84 | -0.26  | 0.02 |
| ENSG00000094804 | CDC6       | 0.83 | -0.27  | 0.02 |
| ENSG00000118432 | CNR1       | 0.28 | -1.83  | 0.02 |
| ENSG00000127616 | SMARCA4    | 0.86 | -0.21  | 0.02 |
| ENSG00000172014 | ANKRD20A4P | 0.03 | -5.03  | 0.02 |
| ENSG00000163002 | NUP35      | 0.74 | -0.43  | 0.02 |
| ENSG00000132563 | REEP2      | 0.57 | -0.81  | 0.02 |
| ENSG00000064419 | TNPO3      | 0.87 | -0.20  | 0.02 |
| ENSG00000164896 | FASTK      | 0.82 | -0.28  | 0.02 |
| ENSG00000111907 | TPD52L1    | 0.80 | -0.33  | 0.02 |
| ENSG00000026297 | RNASET2    | 0.74 | -0.44  | 0.02 |
| ENSG00000167595 | PROSER3    | 0.70 | -0.52  | 0.02 |
| ENSG00000285676 | AL158212   | 0.00 | -10.11 | 0.02 |
| ENSG00000179941 | BBS10      | 0.74 | -0.43  | 0.02 |
| ENSG00000264204 | AGAP7P     | 0.26 | -1.96  | 0.02 |
| ENSG00000105248 | YJU2       | 0.76 | -0.39  | 0.02 |
| ENSG00000102796 | DHRS12     | 0.64 | -0.65  | 0.02 |
| ENSG00000183833 | CFAP91     | 0.55 | -0.86  | 0.02 |
| ENSG00000276168 | RN7SL1     | 0.10 | -3.29  | 0.02 |
| ENSG00000138303 | ASCC1      | 0.81 | -0.30  | 0.02 |
| ENSG00000129048 | ACKR4      | 0.50 | -0.99  | 0.02 |
| ENSG00000115641 | FHL2       | 0.88 | -0.19  | 0.02 |
| ENSG00000162032 | SPSB3      | 0.73 | -0.44  | 0.02 |
| ENSG00000105996 | HOXA2      | 0.51 | -0.97  | 0.02 |
| ENSG00000153234 | NR4A2      | 0.44 | -1.19  | 0.02 |
| ENSG00000141646 | SMAD4      | 0.75 | -0.42  | 0.02 |
| ENSG00000178177 | LCORL      | 0.63 | -0.66  | 0.02 |
| ENSG00000248333 | CDK11B     | 0.86 | -0.22  | 0.02 |
| ENSG00000122877 | EGR2       | 0.26 | -1.97  | 0.02 |
| ENSG00000112167 | SAYSD1     | 0.73 | -0.45  | 0.02 |
| ENSG00000105948 | TTC26      | 0.62 | -0.68  | 0.02 |
| ENSG00000076944 | STXBP2     | 0.84 | -0.25  | 0.02 |
| ENSG00000135315 | CEP162     | 0.61 | -0.72  | 0.02 |
| ENSG00000267414 | SETBP1-DT  | 0.14 | -2.83  | 0.02 |
| ENSG00000186298 | PPP1CC     | 0.80 | -0.33  | 0.02 |
| ENSG00000288398 | AL109627   | 0.65 | -0.62  | 0.02 |
| ENSG00000104824 | HNRNPL     | 0.88 | -0.19  | 0.02 |
| ENSG00000170689 | HOXB9      | 0.83 | -0.27  | 0.02 |
| ENSG00000100784 | RPS6KA5    | 0.68 | -0.55  | 0.02 |
| ENSG00000004534 | RBM6       | 0.79 | -0.33  | 0.02 |
| ENSG00000144857 | BOC        | 0.51 | -0.97  | 0.02 |
| ENSG00000276966 | H4C5       | 0.16 | -2.63  | 0.02 |
| ENSG00000178860 | MSC        | 0.88 | -0.19  | 0.02 |
| ENSG00000140284 | SLC27A2    | 0.30 | -1.75  | 0.02 |
| ENSG00000204682 | MIR1915HG  | 0.79 | -0.34  | 0.02 |
| ENSG00000166813 | KIF7       | 0.71 | -0.49  | 0.02 |
| ENSG00000106686 | SPATA6L    | 0.52 | -0.93  | 0.02 |
| ENSG00000286553 | AL357075   | 0.08 | -3.68  | 0.02 |
| ENSG00000129946 | SHC2       | 0.12 | -3.05  | 0.02 |
| ENSG00000100503 | NIN        | 0.83 | -0.27  | 0.02 |
| ENSG00000105519 | CAPS       | 0.62 | -0.68  | 0.02 |



|                 |             |      |       |      |
|-----------------|-------------|------|-------|------|
| ENSG00000175130 | MARCKSL1    | 0.87 | -0.21 | 0.02 |
| ENSG00000144589 | STK11IP     | 0.82 | -0.29 | 0.02 |
| ENSG00000280055 | TMEM75      | 0.04 | -4.74 | 0.02 |
| ENSG00000204138 | PHACTR4     | 0.71 | -0.49 | 0.02 |
| ENSG00000147601 | TERF1       | 0.83 | -0.27 | 0.02 |
| ENSG00000174353 | STAG3L3     | 0.82 | -0.29 | 0.02 |
| ENSG00000170379 | TCAF2       | 0.51 | -0.98 | 0.02 |
| ENSG00000112293 | GPLD1       | 0.41 | -1.28 | 0.02 |
| ENSG00000008952 | SEC62       | 0.83 | -0.27 | 0.02 |
| ENSG00000158292 | GPR153      | 0.64 | -0.64 | 0.02 |
| ENSG00000011114 | BTBD7       | 0.78 | -0.37 | 0.02 |
| ENSG00000018699 | TTC27       | 0.79 | -0.34 | 0.02 |
| ENSG00000151849 | CENPJ       | 0.71 | -0.50 | 0.02 |
| ENSG00000021762 | OSBPL5      | 0.73 | -0.45 | 0.02 |
| ENSG00000159409 | CELF3       | 0.00 | -7.74 | 0.02 |
| ENSG00000120539 | MASTL       | 0.80 | -0.32 | 0.02 |
| ENSG00000198824 | CHAMP1      | 0.84 | -0.25 | 0.02 |
| ENSG00000205746 | AC126755    | 0.68 | -0.55 | 0.02 |
| ENSG00000089876 | DHX32       | 0.84 | -0.24 | 0.02 |
| ENSG00000160111 | CPAMD8      | 0.25 | -1.98 | 0.02 |
| ENSG00000111879 | FAM184A     | 0.39 | -1.35 | 0.02 |
| ENSG00000204427 | ABHD16A     | 0.79 | -0.33 | 0.02 |
| ENSG00000069018 | TRPC7       | 0.00 | -8.43 | 0.02 |
| ENSG00000254471 | AP001284    | 0.00 | -9.23 | 0.02 |
| ENSG00000180818 | HOXC10      | 0.77 | -0.39 | 0.02 |
| ENSG00000075292 | ZNF638      | 0.78 | -0.36 | 0.02 |
| ENSG00000138336 | TET1        | 0.38 | -1.40 | 0.02 |
| ENSG00000085511 | MAP3K4      | 0.80 | -0.33 | 0.02 |
| ENSG00000274964 | AC026356    | 0.36 | -1.49 | 0.02 |
| ENSG00000077454 | LRCH4       | 0.74 | -0.43 | 0.02 |
| ENSG00000130733 | YIPF2       | 0.82 | -0.29 | 0.02 |
| ENSG00000286805 | AL138716    | 0.31 | -1.67 | 0.02 |
| ENSG00000250021 | ARPIN-AP3S2 | 0.11 | -3.18 | 0.02 |
| ENSG00000036257 | CUL3        | 0.85 | -0.24 | 0.02 |
| ENSG00000172461 | FUT9        | 0.45 | -1.16 | 0.02 |
| ENSG00000237515 | SHISA9      | 0.80 | -0.32 | 0.02 |
| ENSG00000134250 | NOTCH2      | 0.88 | -0.19 | 0.02 |
| ENSG00000166171 | DPCD        | 0.80 | -0.32 | 0.02 |
| ENSG00000077942 | FBLN1       | 0.80 | -0.32 | 0.02 |
| ENSG00000198727 | MT-CYB      | 0.88 | -0.19 | 0.02 |
| ENSG00000108406 | DHX40       | 0.81 | -0.31 | 0.02 |
| ENSG00000048828 | FAM120A     | 0.87 | -0.19 | 0.02 |
| ENSG00000274012 | RN7SL2      | 0.08 | -3.69 | 0.02 |
| ENSG00000154359 | LONRF1      | 0.68 | -0.56 | 0.02 |
| ENSG00000157551 | KCNJ15      | 0.01 | -6.94 | 0.02 |
| ENSG00000163050 | COO8A       | 0.84 | -0.26 | 0.02 |
| ENSG00000198756 | COLGALT2    | 0.47 | -1.09 | 0.02 |
| ENSG00000168795 | ZBTB5       | 0.80 | -0.32 | 0.02 |
| ENSG00000081386 | ZNF510      | 0.68 | -0.56 | 0.02 |
| ENSG00000151090 | THRB        | 0.53 | -0.92 | 0.02 |
| ENSG00000116984 | MTR         | 0.78 | -0.37 | 0.02 |
| ENSG00000285967 | NIPBL-DT    | 0.69 | -0.54 | 0.02 |
| ENSG00000118816 | CCNI        | 0.87 | -0.21 | 0.02 |
| ENSG00000128513 | POT1        | 0.77 | -0.37 | 0.02 |
| ENSG00000111445 | REC5        | 0.71 | -0.50 | 0.02 |
| ENSG00000100207 | TCF20       | 0.75 | -0.42 | 0.03 |
| ENSG00000247095 | MIR210HG    | 0.56 | -0.84 | 0.03 |
| ENSG00000226435 | ANKRD18DP   | 0.00 | -8.62 | 0.03 |
| ENSG00000104427 | ZC2HC1A     | 0.76 | -0.40 | 0.03 |
| ENSG00000285601 | AC084262    | 0.00 | -8.63 | 0.03 |
| ENSG00000113212 | PCDHB7      | 0.00 | -8.40 | 0.03 |

|                 |            |      |        |      |
|-----------------|------------|------|--------|------|
| ENSG00000255750 | AC022509   | 0.12 | -3.04  | 0.03 |
| ENSG00000180354 | MTURN      | 0.38 | -1.40  | 0.03 |
| ENSG00000176170 | SPHK1      | 0.85 | -0.23  | 0.03 |
| ENSG00000092201 | SUPT16H    | 0.85 | -0.23  | 0.03 |
| ENSG00000204816 | FGF7P5     | 0.00 | -12.09 | 0.03 |
| ENSG00000099860 | GADD45B    | 0.65 | -0.63  | 0.03 |
| ENSG00000143537 | ADAM15     | 0.86 | -0.22  | 0.03 |
| ENSG00000122971 | ACADS      | 0.68 | -0.56  | 0.03 |
| ENSG00000011523 | CEP68      | 0.80 | -0.33  | 0.03 |
| ENSG00000163320 | CGGBP1     | 0.78 | -0.35  | 0.03 |
| ENSG00000177225 | GATD1      | 0.71 | -0.48  | 0.03 |
| ENSG00000113119 | TMCO6      | 0.71 | -0.49  | 0.03 |
| ENSG00000079387 | SENP1      | 0.74 | -0.44  | 0.03 |
| ENSG00000092010 | PSME1      | 0.84 | -0.25  | 0.03 |
| ENSG00000107566 | ERLIN1     | 0.85 | -0.23  | 0.03 |
| ENSG00000122694 | GLIPR2     | 0.63 | -0.68  | 0.03 |
| ENSG00000186470 | BTN3A2     | 0.67 | -0.58  | 0.03 |
| ENSG00000175183 | CSRP2      | 0.73 | -0.45  | 0.03 |
| ENSG00000100568 | VTI1B      | 0.85 | -0.24  | 0.03 |
| ENSG00000267426 | AC087289   | 0.62 | -0.68  | 0.03 |
| ENSG00000055211 | GINM1      | 0.80 | -0.32  | 0.03 |
| ENSG00000122778 | KIAA1549   | 0.83 | -0.27  | 0.03 |
| ENSG00000163864 | NMNAT3     | 0.41 | -1.27  | 0.03 |
| ENSG00000138002 | IFT172     | 0.80 | -0.32  | 0.03 |
| ENSG00000204956 | PCDHGA1    | 0.48 | -1.05  | 0.03 |
| ENSG00000148362 | PAXX       | 0.72 | -0.47  | 0.03 |
| ENSG00000160271 | RALGDS     | 0.80 | -0.33  | 0.03 |
| ENSG00000267023 | LRRC37A16P | 0.74 | -0.44  | 0.03 |
| ENSG00000234545 | FAM133B    | 0.75 | -0.41  | 0.03 |
| ENSG00000241635 | UGT1A1     | 0.38 | -1.40  | 0.03 |
| ENSG00000116754 | SRSF11     | 0.83 | -0.27  | 0.03 |
| ENSG00000145014 | TMEM44     | 0.78 | -0.36  | 0.03 |
| ENSG00000137414 | FAM8A1     | 0.76 | -0.40  | 0.03 |
| ENSG00000158552 | ZFAND2B    | 0.77 | -0.38  | 0.03 |
| ENSG00000250305 | TRMT9B     | 0.31 | -1.70  | 0.03 |
| ENSG00000179240 | GVOW3      | 0.48 | -1.06  | 0.03 |
| ENSG00000260625 | AC026471   | 0.00 | -10.37 | 0.03 |
| ENSG00000070756 | PABPC1     | 0.88 | -0.18  | 0.03 |
| ENSG00000172977 | KAT5       | 0.82 | -0.28  | 0.03 |
| ENSG00000287731 | AL035603   | 0.00 | -9.52  | 0.03 |
| ENSG00000111653 | ING4       | 0.79 | -0.34  | 0.03 |
| ENSG00000100030 | MAPK1      | 0.87 | -0.20  | 0.03 |
| ENSG00000112941 | TENT4A     | 0.81 | -0.30  | 0.03 |
| ENSG00000166548 | TK2        | 0.74 | -0.43  | 0.03 |
| ENSG00000167461 | RAB8A      | 0.83 | -0.27  | 0.03 |
| ENSG00000179715 | PCED1B     | 0.69 | -0.54  | 0.03 |
| ENSG00000130023 | ERMARD     | 0.72 | -0.48  | 0.03 |
| ENSG00000165309 | ARMC3      | 0.46 | -1.13  | 0.03 |
| ENSG00000150893 | FREM2      | 0.33 | -1.62  | 0.03 |
| ENSG00000278189 | RNA5-8SN1  | 0.07 | -3.82  | 0.03 |
| ENSG00000107669 | ATE1       | 0.79 | -0.34  | 0.03 |
| ENSG00000136937 | NCBP1      | 0.85 | -0.23  | 0.03 |
| ENSG00000101346 | POFUT1     | 0.87 | -0.20  | 0.03 |
| ENSG00000274791 | F8A2       | 0.69 | -0.54  | 0.03 |
| ENSG00000133265 | HSPBP1     | 0.84 | -0.25  | 0.03 |
| ENSG00000171488 | LRRC8C     | 0.70 | -0.51  | 0.03 |
| ENSG00000156162 | DPY19L4    | 0.80 | -0.32  | 0.03 |
| ENSG00000185619 | PCGF3      | 0.77 | -0.38  | 0.03 |
| ENSG00000168887 | C2orf68    | 0.71 | -0.50  | 0.03 |
| ENSG00000163807 | KIAA1143   | 0.77 | -0.37  | 0.03 |
| ENSG00000134882 | UBAC2      | 0.46 | -1.13  | 0.03 |

|                 |           |      |        |      |
|-----------------|-----------|------|--------|------|
| ENSG00000255843 | AP000593  | 0.00 | -11.19 | 0.03 |
| ENSG00000009694 | TENM1     | 0.14 | -2.79  | 0.03 |
| ENSG00000140262 | TCF12     | 0.70 | -0.51  | 0.03 |
| ENSG00000277157 | H4C4      | 0.00 | -11.73 | 0.03 |
| ENSG00000255182 | AC084125  | 0.54 | -0.89  | 0.03 |
| ENSG00000157796 | WDR19     | 0.79 | -0.35  | 0.03 |
| ENSG00000086015 | MAST2     | 0.86 | -0.22  | 0.03 |
| ENSG00000189223 | PAX8-AS1  | 0.81 | -0.31  | 0.03 |
| ENSG00000149231 | CCDC82    | 0.76 | -0.39  | 0.03 |
| ENSG00000138101 | DTNB      | 0.71 | -0.50  | 0.03 |
| ENSG00000227619 | AL391056  | 0.00 | -8.21  | 0.03 |
| ENSG00000276150 | AL031591  | 0.02 | -5.80  | 0.03 |
| ENSG00000134184 | GSTM1     | 0.07 | -3.86  | 0.03 |
| ENSG00000150540 | HNMT      | 0.73 | -0.45  | 0.03 |
| ENSG00000102805 | CLN5      | 0.78 | -0.35  | 0.03 |
| ENSG00000187867 | PALM3     | 0.08 | -3.61  | 0.03 |
| ENSG00000038219 | BOD1L1    | 0.83 | -0.26  | 0.03 |
| ENSG00000005893 | LAMP2     | 0.88 | -0.19  | 0.03 |
| ENSG00000170927 | PKHD1     | 0.02 | -5.38  | 0.03 |
| ENSG00000106290 | TAF6      | 0.83 | -0.28  | 0.03 |
| ENSG00000213918 | DNASE1    | 0.75 | -0.41  | 0.03 |
| ENSG00000103550 | KNOP1     | 0.85 | -0.24  | 0.03 |
| ENSG00000101004 | NINL      | 0.70 | -0.51  | 0.03 |
| ENSG00000196943 | NOP9      | 0.80 | -0.32  | 0.03 |
| ENSG00000124406 | ATP8A1    | 0.36 | -1.46  | 0.03 |
| ENSG00000124134 | KCNS1     | 0.57 | -0.82  | 0.03 |
| ENSG00000113319 | RASGRF2   | 0.28 | -1.85  | 0.03 |
| ENSG00000163374 | YY1AP1    | 0.86 | -0.22  | 0.03 |
| ENSG00000164841 | TMEM74    | 0.40 | -1.32  | 0.03 |
| ENSG00000248008 | NRAV      | 0.83 | -0.27  | 0.03 |
| ENSG00000176472 | ZNF575    | 0.40 | -1.32  | 0.03 |
| ENSG00000115365 | LANCL1    | 0.85 | -0.24  | 0.03 |
| ENSG00000100852 | ARHGAP5   | 0.83 | -0.27  | 0.03 |
| ENSG00000134313 | KIDINS220 | 0.80 | -0.32  | 0.03 |
| ENSG00000214110 | LDHAP4    | 0.75 | -0.41  | 0.03 |
| ENSG00000137821 | LRRC49    | 0.65 | -0.62  | 0.03 |
| ENSG00000187243 | MAGED4B   | 0.75 | -0.42  | 0.03 |
| ENSG00000254477 | AP000640  | 0.33 | -1.60  | 0.03 |
| ENSG00000085644 | ZNF213    | 0.63 | -0.66  | 0.03 |
| ENSG00000287733 | AC083862  | 0.53 | -0.90  | 0.03 |
| ENSG00000171792 | RHNO1     | 0.73 | -0.45  | 0.03 |
| ENSG00000136247 | ZDHHC4    | 0.79 | -0.34  | 0.03 |
| ENSG00000159110 | IFNAR2    | 0.63 | -0.66  | 0.03 |
| ENSG00000143486 | EIF2D     | 0.83 | -0.26  | 0.03 |
| ENSG00000160796 | NBEAL2    | 0.79 | -0.33  | 0.03 |
| ENSG00000171988 | JMJD1C    | 0.76 | -0.40  | 0.03 |
| ENSG00000157765 | SLC34A2   | 0.13 | -2.98  | 0.03 |
| ENSG00000108424 | KPNB1     | 0.83 | -0.26  | 0.03 |
| ENSG00000185485 | SDHAP1    | 0.78 | -0.37  | 0.03 |
| ENSG00000112305 | SMAP1     | 0.80 | -0.33  | 0.03 |
| ENSG00000235314 | LINC00957 | 0.43 | -1.20  | 0.03 |
| ENSG00000004399 | PLXND1    | 0.82 | -0.29  | 0.03 |
| ENSG00000182013 | PNMA8A    | 0.80 | -0.33  | 0.03 |
| ENSG00000180233 | ZNRF2     | 0.76 | -0.40  | 0.03 |
| ENSG00000164743 | C8orf48   | 0.58 | -0.78  | 0.03 |
| ENSG00000204619 | PPP1R11   | 0.86 | -0.21  | 0.03 |
| ENSG00000260244 | AC104083  | 0.10 | -3.34  | 0.03 |
| ENSG00000102878 | HSF4      | 0.67 | -0.59  | 0.03 |
| ENSG00000163714 | U2SURP    | 0.84 | -0.24  | 0.03 |
| ENSG00000132024 | CC2D1A    | 0.84 | -0.24  | 0.03 |
| ENSG00000170542 | SERPINB9  | 0.55 | -0.87  | 0.03 |

|                 |             |      |        |      |
|-----------------|-------------|------|--------|------|
| ENSG00000260597 | AC012531    | 0.52 | -0.95  | 0.03 |
| ENSG00000179387 | ELMOD2      | 0.76 | -0.40  | 0.03 |
| ENSG00000184226 | PCDH9       | 0.35 | -1.51  | 0.03 |
| ENSG00000081019 | RSBN1       | 0.77 | -0.38  | 0.03 |
| ENSG00000249773 | AC092647    | 0.14 | -2.84  | 0.03 |
| ENSG00000110237 | ARHGEF17    | 0.83 | -0.26  | 0.03 |
| ENSG00000158747 | NBL1        | 0.86 | -0.21  | 0.03 |
| ENSG00000146197 | SCUBE3      | 0.13 | -2.99  | 0.03 |
| ENSG00000099282 | TSPAN15     | 0.77 | -0.38  | 0.03 |
| ENSG00000079150 | FKBP7       | 0.72 | -0.48  | 0.03 |
| ENSG00000116649 | SRM         | 0.87 | -0.21  | 0.03 |
| ENSG00000131470 | PSMC3IP     | 0.75 | -0.41  | 0.03 |
| ENSG00000278921 | EPB41L4A-DT | 0.11 | -3.21  | 0.03 |
| ENSG00000182253 | SYNM        | 0.83 | -0.27  | 0.03 |
| ENSG00000117600 | PLPPR4      | 0.11 | -3.24  | 0.03 |
| ENSG00000121775 | TMEM39B     | 0.78 | -0.35  | 0.03 |
| ENSG00000159069 | FBXW5       | 0.84 | -0.25  | 0.03 |
| ENSG00000165124 | SVEP1       | 0.34 | -1.57  | 0.03 |
| ENSG00000165714 | BORCS5      | 0.43 | -1.22  | 0.03 |
| ENSG00000158528 | PPP1R9A     | 0.54 | -0.88  | 0.03 |
| ENSG00000086232 | EIF2AK1     | 0.85 | -0.23  | 0.03 |
| ENSG00000137642 | SORL1       | 0.66 | -0.59  | 0.03 |
| ENSG00000197965 | MPZL1       | 0.27 | -1.86  | 0.03 |
| ENSG00000226549 | SCDP1       | 0.06 | -4.12  | 0.03 |
| ENSG00000047230 | CTPS2       | 0.80 | -0.33  | 0.03 |
| ENSG00000136280 | CCM2        | 0.78 | -0.37  | 0.03 |
| ENSG00000133243 | BTBD2       | 0.85 | -0.23  | 0.03 |
| ENSG00000144791 | LIMD1       | 0.82 | -0.28  | 0.03 |
| ENSG00000138741 | TRPC3       | 0.08 | -3.64  | 0.03 |
| ENSG00000202252 | SNORD14C    | 0.00 | -8.68  | 0.03 |
| ENSG00000155755 | TMEM237     | 0.81 | -0.30  | 0.03 |
| ENSG00000229809 | ZNF688      | 0.70 | -0.52  | 0.03 |
| ENSG00000143036 | SLC44A3     | 0.43 | -1.20  | 0.03 |
| ENSG00000163545 | NUAK2       | 0.79 | -0.35  | 0.03 |
| ENSG00000185522 | LMNTD2      | 0.51 | -0.97  | 0.03 |
| ENSG00000140057 | AK7         | 0.44 | -1.17  | 0.03 |
| ENSG00000198740 | ZNF652      | 0.80 | -0.32  | 0.03 |
| ENSG00000151458 | ANKRD50     | 0.84 | -0.25  | 0.03 |
| ENSG00000236698 | EIF1AXP1    | 0.74 | -0.44  | 0.03 |
| ENSG00000178585 | CTNNBIP1    | 0.71 | -0.49  | 0.03 |
| ENSG00000283795 | MIR4426     | 0.05 | -4.26  | 0.03 |
| ENSG00000240032 | LNCsRLR     | 0.24 | -2.06  | 0.03 |
| ENSG00000108349 | CASC3       | 0.87 | -0.20  | 0.03 |
| ENSG00000170962 | PDGED       | 0.60 | -0.73  | 0.03 |
| ENSG00000165030 | NFIL3       | 0.83 | -0.27  | 0.03 |
| ENSG00000186063 | AIDA        | 0.80 | -0.33  | 0.03 |
| ENSG00000171928 | TVP23B      | 0.80 | -0.33  | 0.03 |
| ENSG00000226200 | SGMS1-AS1   | 0.59 | -0.75  | 0.03 |
| ENSG00000135480 | KRT7        | 0.62 | -0.69  | 0.03 |
| ENSG00000205220 | PSMB10      | 0.82 | -0.29  | 0.03 |
| ENSG00000227598 | Z94721      | 0.00 | -11.53 | 0.03 |
| ENSG00000269425 | AC104521    | 0.00 | -12.02 | 0.03 |
| ENSG00000167393 | PPP2R3B     | 0.66 | -0.59  | 0.03 |
| ENSG00000077279 | DCX         | 0.01 | -6.82  | 0.03 |
| ENSG00000163273 | NPPC        | 0.00 | -10.06 | 0.03 |
| ENSG00000133985 | TTC9        | 0.00 | -7.82  | 0.03 |
| ENSG00000230409 | TCEA1P2     | 0.51 | -0.97  | 0.03 |
| ENSG00000105792 | CFAP69      | 0.40 | -1.32  | 0.03 |
| ENSG00000100888 | CHD8        | 0.81 | -0.31  | 0.03 |
| ENSG00000265413 | AP001094    | 0.37 | -1.45  | 0.03 |
| ENSG00000119402 | FBXW2       | 0.86 | -0.22  | 0.03 |

|                 |          |      |        |      |
|-----------------|----------|------|--------|------|
| ENSG00000162430 | SELENON  | 0.86 | -0.22  | 0.03 |
| ENSG00000134258 | VTCN1    | 0.00 | -8.57  | 0.03 |
| ENSG00000243135 | UGT1A3   | 0.00 | -8.91  | 0.03 |
| ENSG00000224083 | MTCO1P11 | 0.00 | -9.54  | 0.03 |
| ENSG00000141542 | RAB40B   | 0.72 | -0.47  | 0.03 |
| ENSG00000115884 | SDC1     | 0.85 | -0.24  | 0.03 |
| ENSG00000173599 | PC       | 0.84 | -0.26  | 0.03 |
| ENSG00000117616 | RSRP1    | 0.63 | -0.67  | 0.03 |
| ENSG00000130382 | MLLT1    | 0.88 | -0.18  | 0.03 |
| ENSG00000269534 | AC011466 | 0.00 | -10.22 | 0.03 |
| ENSG00000082641 | NFE2L1   | 0.78 | -0.35  | 0.03 |
| ENSG00000196504 | PRPF40A  | 0.85 | -0.24  | 0.03 |
| ENSG00000100564 | PIGH     | 0.60 | -0.73  | 0.03 |
| ENSG00000196436 | NPIP15   | 0.54 | -0.90  | 0.03 |
| ENSG00000234602 | MCIDAS   | 0.34 | -1.54  | 0.03 |
| ENSG00000138036 | DYNC2LI1 | 0.70 | -0.52  | 0.03 |
| ENSG00000262160 | AC020978 | 0.00 | -9.47  | 0.03 |
| ENSG00000204131 | NHSL2    | 0.11 | -3.21  | 0.03 |
| ENSG00000103723 | AP3B2    | 0.01 | -6.71  | 0.03 |
| ENSG00000118017 | A4GNT    | 0.20 | -2.36  | 0.03 |
| ENSG00000263961 | RHEX     | 0.84 | -0.26  | 0.03 |
| ENSG00000100889 | PCK2     | 0.80 | -0.33  | 0.03 |
| ENSG00000134548 | SPX      | 0.43 | -1.22  | 0.03 |
| ENSG00000237973 | MTCO1P12 | 0.87 | -0.20  | 0.03 |
| ENSG00000071073 | MGAT4A   | 0.72 | -0.47  | 0.03 |
| ENSG00000147421 | HMBOX1   | 0.61 | -0.71  | 0.03 |
| ENSG00000263513 | FAM72C   | 0.80 | -0.33  | 0.03 |
| ENSG00000163378 | EOGT     | 0.69 | -0.53  | 0.03 |
| ENSG00000166900 | STX3     | 0.83 | -0.26  | 0.03 |
| ENSG00000179627 | ZBTB42   | 0.60 | -0.74  | 0.03 |
| ENSG00000167861 | HID1     | 0.28 | -1.83  | 0.03 |
| ENSG00000117984 | CTSD     | 0.85 | -0.23  | 0.03 |
| ENSG00000180902 | D2HGDH   | 0.71 | -0.50  | 0.03 |
| ENSG00000205084 | TMEM231  | 0.81 | -0.31  | 0.03 |
| ENSG00000255856 | AC069503 | 0.00 | -9.93  | 0.03 |
| ENSG00000088256 | GNA11    | 0.84 | -0.26  | 0.03 |
| ENSG00000151502 | VPS26B   | 0.86 | -0.22  | 0.03 |
| ENSG00000156650 | KAT6B    | 0.76 | -0.40  | 0.03 |
| ENSG00000163931 | TKT      | 0.89 | -0.17  | 0.03 |
| ENSG00000140983 | RHOT2    | 0.84 | -0.25  | 0.03 |
| ENSG00000090924 | PLEKHG2  | 0.84 | -0.25  | 0.04 |
| ENSG00000168806 | LCMT2    | 0.75 | -0.41  | 0.04 |
| ENSG00000070814 | TCOF1    | 0.88 | -0.18  | 0.04 |
| ENSG00000129810 | SGO1     | 0.72 | -0.48  | 0.04 |
| ENSG00000272990 | AC084036 | 0.21 | -2.23  | 0.04 |
| ENSG00000168517 | HEXIM2   | 0.70 | -0.51  | 0.04 |
| ENSG00000178149 | DALRD3   | 0.78 | -0.36  | 0.04 |
| ENSG00000135976 | ANKRD36  | 0.63 | -0.68  | 0.04 |
| ENSG00000138801 | PAPSS1   | 0.84 | -0.24  | 0.04 |
| ENSG00000070047 | PHRF1    | 0.86 | -0.21  | 0.04 |
| ENSG00000091986 | CCDC80   | 0.53 | -0.91  | 0.04 |
| ENSG00000137814 | HAUS2    | 0.71 | -0.48  | 0.04 |
| ENSG00000149182 | ARFGAP2  | 0.87 | -0.20  | 0.04 |
| ENSG00000146416 | AIG1     | 0.79 | -0.33  | 0.04 |
| ENSG00000169946 | ZFPM2    | 0.64 | -0.65  | 0.04 |
| ENSG00000259577 | CERNA1   | 0.00 | -8.56  | 0.04 |
| ENSG00000261141 | AC092718 | 0.00 | -11.05 | 0.04 |
| ENSG00000144134 | RABL2A   | 0.68 | -0.55  | 0.04 |
| ENSG00000166130 | IKBIP    | 0.86 | -0.22  | 0.04 |
| ENSG00000285437 | POLR2J3  | 0.54 | -0.90  | 0.04 |
| ENSG00000166845 | C18orf54 | 0.58 | -0.79  | 0.04 |

|                 |           |      |        |      |
|-----------------|-----------|------|--------|------|
| ENSG00000188312 | CENPP     | 0.76 | -0.40  | 0.04 |
| ENSG00000272150 | NBPF25P   | 0.65 | -0.61  | 0.04 |
| ENSG00000196810 | CTBP1-DT  | 0.72 | -0.48  | 0.04 |
| ENSG00000010361 | FUZ       | 0.65 | -0.63  | 0.04 |
| ENSG00000288637 | AC013477  | 0.26 | -1.94  | 0.04 |
| ENSG00000115808 | STRN      | 0.79 | -0.33  | 0.04 |
| ENSG00000162929 | KIAA1841  | 0.66 | -0.59  | 0.04 |
| ENSG00000244474 | UGT1A4    | 0.04 | -4.76  | 0.04 |
| ENSG00000019144 | PHLDB1    | 0.83 | -0.27  | 0.04 |
| ENSG00000069849 | ATP1B3    | 0.75 | -0.42  | 0.04 |
| ENSG00000165512 | ZNF22     | 0.79 | -0.34  | 0.04 |
| ENSG00000135999 | EPC2      | 0.80 | -0.31  | 0.04 |
| ENSG00000135164 | DMTF1     | 0.80 | -0.33  | 0.04 |
| ENSG00000172244 | C5orf34   | 0.71 | -0.49  | 0.04 |
| ENSG00000160209 | PDXK      | 0.87 | -0.20  | 0.04 |
| ENSG00000184678 | H2BC21    | 0.68 | -0.57  | 0.04 |
| ENSG00000115355 | CCDC88A   | 0.81 | -0.30  | 0.04 |
| ENSG00000274600 | RIMBP3B   | 0.00 | -8.49  | 0.04 |
| ENSG00000120256 | LRP11     | 0.78 | -0.36  | 0.04 |
| ENSG00000006747 | SCIN      | 0.80 | -0.33  | 0.04 |
| ENSG00000082458 | DLG3      | 0.66 | -0.60  | 0.04 |
| ENSG00000166037 | CEP57     | 0.76 | -0.40  | 0.04 |
| ENSG00000162437 | RAVER2    | 0.78 | -0.37  | 0.04 |
| ENSG00000281383 | FP671120  | 0.23 | -2.15  | 0.04 |
| ENSG00000226193 | AL049548  | 0.00 | -11.61 | 0.04 |
| ENSG00000163029 | SMC6      | 0.79 | -0.33  | 0.04 |
| ENSG00000172493 | AFF1      | 0.54 | -0.88  | 0.04 |
| ENSG00000112319 | EYA4      | 0.74 | -0.44  | 0.04 |
| ENSG00000233006 | MIR3936HG | 0.53 | -0.92  | 0.04 |
| ENSG00000174720 | LARP7     | 0.78 | -0.36  | 0.04 |
| ENSG00000253366 | GUSBP16   | 0.40 | -1.33  | 0.04 |
| ENSG00000185127 | C6orf120  | 0.80 | -0.32  | 0.04 |
| ENSG00000099904 | ZDHC8     | 0.81 | -0.30  | 0.04 |
| ENSG00000006282 | SPATA20   | 0.86 | -0.22  | 0.04 |
| ENSG00000130227 | XPO7      | 0.88 | -0.18  | 0.04 |
| ENSG00000153250 | RBMS1     | 0.86 | -0.23  | 0.04 |
| ENSG00000122644 | ARL4A     | 0.64 | -0.63  | 0.04 |
| ENSG00000171119 | NRTN      | 0.18 | -2.48  | 0.04 |
| ENSG00000176209 | SMIM19    | 0.66 | -0.61  | 0.04 |
| ENSG00000144645 | OSBPL10   | 0.78 | -0.36  | 0.04 |
| ENSG00000119685 | TTLL5     | 0.72 | -0.48  | 0.04 |
| ENSG00000259498 | TPM1-AS   | 0.49 | -1.02  | 0.04 |
| ENSG00000198106 | AC025279  | 0.00 | -7.91  | 0.04 |
| ENSG00000166348 | USP54     | 0.81 | -0.30  | 0.04 |
| ENSG00000185829 | ARL17A    | 0.78 | -0.35  | 0.04 |
| ENSG00000123200 | ZC3H13    | 0.86 | -0.21  | 0.04 |
| ENSG00000146085 | MMUT      | 0.82 | -0.29  | 0.04 |
| ENSG00000108055 | SMC3      | 0.82 | -0.29  | 0.04 |
| ENSG00000198952 | SMG5      | 0.89 | -0.17  | 0.04 |
| ENSG00000279789 | AC120114  | 0.65 | -0.63  | 0.04 |
| ENSG00000227684 | CROCCP4   | 0.00 | -10.43 | 0.04 |
| ENSG00000270977 | AC015849  | 0.24 | -2.05  | 0.04 |
| ENSG00000100485 | SOS2      | 0.71 | -0.49  | 0.04 |
| ENSG00000229117 | RPL41     | 0.89 | -0.16  | 0.04 |
| ENSG00000198931 | APRT      | 0.84 | -0.26  | 0.04 |
| ENSG00000102699 | PARP4     | 0.87 | -0.19  | 0.04 |
| ENSG00000279044 | AC007787  | 0.09 | -3.51  | 0.04 |
| ENSG00000275016 | AC015574  | 0.01 | -7.14  | 0.04 |
| ENSG00000039600 | SOX30     | 0.00 | -8.38  | 0.04 |
| ENSG00000134698 | AGO4      | 0.78 | -0.36  | 0.04 |
| ENSG00000283549 | AC007161  | 0.07 | -3.86  | 0.04 |

|                 |           |      |        |      |
|-----------------|-----------|------|--------|------|
| ENSG00000147654 | EBAG9     | 0.73 | -0.46  | 0.04 |
| ENSG00000151176 | PLBD2     | 0.87 | -0.20  | 0.04 |
| ENSG00000185942 | NKAIN3    | 0.03 | -5.23  | 0.04 |
| ENSG00000116544 | DLGAP3    | 0.00 | -8.10  | 0.04 |
| ENSG00000246596 | AC139795  | 0.50 | -1.00  | 0.04 |
| ENSG00000142784 | WDTC1     | 0.86 | -0.22  | 0.04 |
| ENSG00000179051 | RCC2      | 0.87 | -0.20  | 0.04 |
| ENSG00000163964 | PIGX      | 0.81 | -0.30  | 0.04 |
| ENSG00000173207 | CKS1B     | 0.87 | -0.20  | 0.04 |
| ENSG00000245248 | USP2-AS1  | 0.40 | -1.33  | 0.04 |
| ENSG00000187398 | LUZP2     | 0.01 | -7.12  | 0.04 |
| ENSG00000179262 | RAD23A    | 0.83 | -0.26  | 0.04 |
| ENSG00000064666 | CNN2      | 0.86 | -0.21  | 0.04 |
| ENSG00000116641 | DOCK7     | 0.85 | -0.24  | 0.04 |
| ENSG00000143324 | XPR1      | 0.87 | -0.21  | 0.04 |
| ENSG00000101306 | MYLK2     | 0.11 | -3.15  | 0.04 |
| ENSG00000163935 | SFMBT1    | 0.67 | -0.57  | 0.04 |
| ENSG00000010244 | ZNF207    | 0.88 | -0.18  | 0.04 |
| ENSG00000168061 | SAC3D1    | 0.79 | -0.35  | 0.04 |
| ENSG00000198964 | SGMS1     | 0.79 | -0.34  | 0.04 |
| ENSG00000246523 | FZD4-DT   | 0.09 | -3.50  | 0.04 |
| ENSG00000163607 | GTPBP8    | 0.73 | -0.46  | 0.04 |
| ENSG00000204174 | NPY4R     | 0.00 | -9.09  | 0.04 |
| ENSG00000165494 | PCF11     | 0.85 | -0.24  | 0.04 |
| ENSG00000106392 | C1GALT1   | 0.80 | -0.33  | 0.04 |
| ENSG00000196482 | ESRRG     | 0.48 | -1.06  | 0.04 |
| ENSG00000267892 | AC022144  | 0.14 | -2.81  | 0.04 |
| ENSG00000276550 | HERC2P2   | 0.84 | -0.25  | 0.04 |
| ENSG00000155111 | CDK19     | 0.80 | -0.33  | 0.04 |
| ENSG00000078177 | N4BP2     | 0.72 | -0.48  | 0.04 |
| ENSG00000281181 | FP236383  | 0.24 | -2.09  | 0.04 |
| ENSG00000159714 | ZDHHC1    | 0.76 | -0.39  | 0.04 |
| ENSG00000230432 | AC114803  | 0.00 | -11.83 | 0.04 |
| ENSG00000129195 | PIMREG    | 0.82 | -0.29  | 0.04 |
| ENSG00000101040 | ZMYND8    | 0.87 | -0.20  | 0.04 |
| ENSG00000272221 | AL645933  | 0.23 | -2.11  | 0.04 |
| ENSG00000165121 | AL353743  | 0.42 | -1.27  | 0.04 |
| ENSG00000160392 | C19orf47  | 0.64 | -0.65  | 0.04 |
| ENSG00000143499 | SMYD2     | 0.87 | -0.20  | 0.04 |
| ENSG00000189423 | USP32P3   | 0.58 | -0.79  | 0.04 |
| ENSG00000196782 | MAML3     | 0.60 | -0.73  | 0.04 |
| ENSG00000136811 | ODF2      | 0.84 | -0.25  | 0.04 |
| ENSG00000014164 | ZC3H3     | 0.85 | -0.24  | 0.04 |
| ENSG00000119782 | FKBP1B    | 0.51 | -0.98  | 0.04 |
| ENSG00000182208 | MOB2      | 0.83 | -0.27  | 0.04 |
| ENSG00000241769 | LINC00893 | 0.40 | -1.32  | 0.04 |
| ENSG00000236890 | AC016027  | 0.00 | -12.31 | 0.04 |
| ENSG00000221890 | NPTXR     | 0.87 | -0.20  | 0.04 |
| ENSG00000134115 | CNTN6     | 0.33 | -1.62  | 0.04 |
| ENSG00000115524 | SF3B1     | 0.87 | -0.21  | 0.04 |
| ENSG00000163344 | PMVK      | 0.84 | -0.25  | 0.04 |
| ENSG00000106526 | ACTR3C    | 0.54 | -0.90  | 0.04 |
| ENSG00000143801 | PSEN2     | 0.83 | -0.27  | 0.04 |
| ENSG00000074276 | CDHR2     | 0.33 | -1.61  | 0.04 |
| ENSG00000198924 | DCLRE1A   | 0.78 | -0.36  | 0.04 |
| ENSG00000272374 | Z97832    | 0.47 | -1.07  | 0.04 |
| ENSG00000254479 | SLC25A1P1 | 0.00 | -10.17 | 0.04 |
| ENSG00000132475 | H3-3B     | 0.86 | -0.21  | 0.04 |
| ENSG00000117862 | TXNDC12   | 0.86 | -0.22  | 0.04 |
| ENSG00000137193 | PIM1      | 0.82 | -0.28  | 0.04 |
| ENSG00000213096 | ZNF254    | 0.49 | -1.04  | 0.04 |

|                 |                 |      |        |      |
|-----------------|-----------------|------|--------|------|
| ENSG00000278730 | AC005332        | 0.83 | -0.26  | 0.04 |
| ENSG00000242348 | RN7SL561P       | 0.00 | -11.97 | 0.04 |
| ENSG00000135387 | CAPRIN1         | 0.88 | -0.19  | 0.04 |
| ENSG00000176749 | CDK5R1          | 0.62 | -0.70  | 0.04 |
| ENSG00000198860 | TSEN15          | 0.80 | -0.32  | 0.04 |
| ENSG00000152422 | XRCC4           | 0.75 | -0.42  | 0.04 |
| ENSG00000096717 | SIRT1           | 0.80 | -0.33  | 0.04 |
| ENSG00000167528 | ZNF641          | 0.75 | -0.42  | 0.04 |
| ENSG00000204843 | DCTN1           | 0.88 | -0.18  | 0.04 |
| ENSG00000177663 | IL17RA          | 0.81 | -0.30  | 0.04 |
| ENSG00000238258 | AL121748        | 0.13 | -3.00  | 0.04 |
| ENSG00000266934 | AC005746        | 0.06 | -3.97  | 0.04 |
| ENSG00000104915 | STX10           | 0.80 | -0.31  | 0.04 |
| ENSG00000177239 | MAN1B1          | 0.87 | -0.21  | 0.04 |
| ENSG00000175581 | MRPL48          | 0.80 | -0.32  | 0.04 |
| ENSG00000182551 | ADI1            | 0.83 | -0.27  | 0.04 |
| ENSG00000140564 | FURIN           | 0.88 | -0.19  | 0.04 |
| ENSG00000267104 | TBC1D3P1-DHX40P | 0.08 | -3.71  | 0.04 |
| ENSG00000229334 | AC046143        | 0.53 | -0.91  | 0.04 |
| ENSG00000280800 | FP671120        | 0.23 | -2.10  | 0.04 |
| ENSG00000136238 | RAC1            | 0.89 | -0.16  | 0.04 |
| ENSG00000163950 | SLBP            | 0.87 | -0.20  | 0.04 |
| ENSG00000287560 | AL731533        | 0.46 | -1.11  | 0.04 |
| ENSG00000126464 | PRR12           | 0.87 | -0.20  | 0.04 |
| ENSG00000100162 | CENPM           | 0.77 | -0.38  | 0.04 |
| ENSG00000146776 | ATXN7L1         | 0.70 | -0.51  | 0.04 |
| ENSG00000185787 | MORF4L1         | 0.83 | -0.27  | 0.04 |
| ENSG00000113558 | SKP1            | 0.88 | -0.18  | 0.04 |
| ENSG00000228253 | MT-ATP8         | 0.88 | -0.18  | 0.04 |
| ENSG00000100941 | PNN             | 0.83 | -0.27  | 0.04 |
| ENSG00000089597 | GANAB           | 0.88 | -0.19  | 0.04 |
| ENSG00000099250 | NRP1            | 0.77 | -0.37  | 0.04 |
| ENSG00000140104 | CLBA1           | 0.68 | -0.55  | 0.04 |
| ENSG00000070018 | LRP6            | 0.82 | -0.29  | 0.04 |
| ENSG00000160703 | NLRX1           | 0.82 | -0.28  | 0.04 |
| ENSG00000279289 | AL136164        | 0.48 | -1.06  | 0.04 |
| ENSG00000166479 | TMX3            | 0.82 | -0.28  | 0.04 |
| ENSG00000174125 | TLR1            | 0.67 | -0.58  | 0.04 |
| ENSG00000272391 | POM121C         | 0.88 | -0.18  | 0.04 |
| ENSG00000156508 | EEF1A1          | 0.90 | -0.15  | 0.04 |
| ENSG00000184986 | TMEM121         | 0.43 | -1.21  | 0.04 |
| ENSG00000143315 | PIGM            | 0.83 | -0.27  | 0.04 |
| ENSG00000110455 | ACCS            | 0.74 | -0.44  | 0.04 |
| ENSG00000228559 | AL033519        | 0.00 | -9.34  | 0.04 |
| ENSG00000279329 | AC020910        | 0.36 | -1.46  | 0.04 |
| ENSG00000120690 | ELF1            | 0.78 | -0.36  | 0.04 |
| ENSG00000115998 | C2orf42         | 0.73 | -0.46  | 0.04 |
| ENSG00000185946 | RNPC3           | 0.79 | -0.34  | 0.04 |
| ENSG00000216775 | AL109918        | 0.62 | -0.69  | 0.04 |
| ENSG00000090971 | NAT14           | 0.81 | -0.30  | 0.04 |
| ENSG00000279833 | AL031846        | 0.35 | -1.53  | 0.04 |
| ENSG00000133226 | SRRM1           | 0.88 | -0.19  | 0.04 |
| ENSG00000273259 | AL049839        | 0.00 | -9.36  | 0.04 |
| ENSG00000101773 | RBBP8           | 0.83 | -0.26  | 0.04 |
| ENSG00000124702 | KLHDC3          | 0.88 | -0.19  | 0.04 |
| ENSG00000154529 | CNTNAP3B        | 0.40 | -1.32  | 0.04 |
| ENSG00000107249 | GLIS3           | 0.82 | -0.29  | 0.04 |
| ENSG00000267436 | AC005786        | 0.68 | -0.56  | 0.04 |
| ENSG00000006062 | MAP3K14         | 0.84 | -0.25  | 0.04 |
| ENSG00000203952 | CCDC160         | 0.38 | -1.38  | 0.04 |
| ENSG00000238755 | LINC02006       | 0.00 | -8.53  | 0.05 |



|                 |                |      |        |      |
|-----------------|----------------|------|--------|------|
| ENSG00000288061 | AP000926       | 0.00 | -10.51 | 0.05 |
| ENSG00000249532 | MIR302CHG      | 0.00 | -10.46 | 0.05 |
| ENSG00000121879 | PIK3CA         | 0.80 | -0.33  | 0.05 |
| ENSG00000287762 | AC108050       | 0.26 | -1.92  | 0.05 |
| ENSG00000182712 | CMC4           | 0.71 | -0.49  | 0.05 |
| ENSG00000173821 | RNF213         | 0.89 | -0.16  | 0.05 |
| ENSG00000196405 | EVL            | 0.73 | -0.45  | 0.05 |
| ENSG00000157368 | IL34           | 0.13 | -2.95  | 0.05 |
| ENSG00000089199 | CHGB           | 0.14 | -2.86  | 0.05 |
| ENSG00000140044 | JDP2           | 0.72 | -0.47  | 0.05 |
| ENSG00000288258 | BX470111       | 0.00 | -11.08 | 0.05 |
| ENSG00000275191 | AC007497       | 0.00 | -10.88 | 0.05 |
| ENSG00000135409 | AMHR2          | 0.00 | -8.09  | 0.05 |
| ENSG00000199293 | SNORA21        | 0.04 | -4.51  | 0.05 |
| ENSG00000109339 | MAPK10         | 0.55 | -0.86  | 0.05 |
| ENSG00000238109 | RNF14P3        | 0.00 | -9.53  | 0.05 |
| ENSG00000157021 | CIBAR1P1       | 0.62 | -0.68  | 0.05 |
| ENSG00000111602 | TIMELESS       | 0.87 | -0.20  | 0.05 |
| ENSG00000149506 | ZP1            | 0.45 | -1.14  | 0.05 |
| ENSG00000163162 | RNF149         | 0.87 | -0.20  | 0.05 |
| ENSG00000107560 | RAB11FIP2      | 0.77 | -0.38  | 0.05 |
| ENSG00000177646 | ACAD9          | 0.86 | -0.21  | 0.05 |
| ENSG00000271474 | AC106881       | 0.15 | -2.75  | 0.05 |
| ENSG00000114026 | OGG1           | 0.77 | -0.37  | 0.05 |
| ENSG00000244754 | N4BP2L2        | 0.81 | -0.30  | 0.05 |
| ENSG00000173535 | TNERSF10C      | 0.20 | -2.34  | 0.05 |
| ENSG00000166321 | NUDT13         | 0.66 | -0.61  | 0.05 |
| ENSG00000198744 | MTCO3P12       | 0.63 | -0.66  | 0.05 |
| ENSG00000170667 | RASA4B         | 0.63 | -0.68  | 0.05 |
| ENSG00000161265 | U2AF1L4        | 0.63 | -0.68  | 0.05 |
| ENSG00000241852 | C8orf58        | 0.79 | -0.33  | 0.05 |
| ENSG00000196312 | MFSD14C        | 0.83 | -0.26  | 0.05 |
| ENSG00000234857 | HNRNPUL2-BSCL2 | 0.20 | -2.31  | 0.05 |
| ENSG00000189184 | PCDH18         | 0.58 | -0.78  | 0.05 |
| ENSG00000088881 | EBF4           | 0.09 | -3.41  | 0.05 |
| ENSG00000140830 | TXNL4B         | 0.79 | -0.34  | 0.05 |
| ENSG00000112701 | SENP6          | 0.81 | -0.30  | 0.05 |
| ENSG00000259426 | AC027237       | 0.38 | -1.39  | 0.05 |
| ENSG00000157423 | HYDIN          | 0.33 | -1.61  | 0.05 |
| ENSG00000280614 | FP236383       | 0.24 | -2.05  | 0.05 |
| ENSG00000152193 | OBI1           | 0.80 | -0.32  | 0.05 |
| ENSG00000149212 | SESN3          | 0.61 | -0.72  | 0.05 |
| ENSG00000131797 | CLUHP3         | 0.50 | -1.00  | 0.05 |
| ENSG00000068784 | SRBD1          | 0.73 | -0.46  | 0.05 |
| ENSG00000146410 | MIFR2          | 0.69 | -0.54  | 0.05 |
| ENSG00000142856 | ITGB3BP        | 0.80 | -0.32  | 0.05 |
| ENSG00000185418 | TARS3          | 0.79 | -0.35  | 0.05 |
| ENSG00000239474 | KLHL41         | 0.00 | -8.62  | 0.05 |
| ENSG00000138944 | SHISAL1        | 0.81 | -0.31  | 0.05 |
| ENSG00000118961 | LDAH           | 0.75 | -0.42  | 0.05 |
| ENSG00000147364 | FBXO25         | 0.82 | -0.29  | 0.05 |
| ENSG00000125945 | ZNF436         | 0.80 | -0.32  | 0.05 |
| ENSG00000132773 | TOE1           | 0.82 | -0.28  | 0.05 |
| ENSG00000107159 | CA9            | 0.12 | -3.12  | 0.05 |
| ENSG00000071794 | HLTF           | 0.77 | -0.38  | 0.05 |
| ENSG00000164649 | CDCA7L         | 0.80 | -0.32  | 0.05 |
| ENSG00000109736 | MFSD10         | 0.86 | -0.22  | 0.05 |
| ENSG00000188343 | CIBAR1         | 0.77 | -0.38  | 0.05 |
| ENSG00000112081 | SRSF3          | 0.88 | -0.18  | 0.05 |
| ENSG00000178927 | CYBC1          | 0.81 | -0.30  | 0.05 |
| ENSG00000173588 | CEP83          | 0.69 | -0.54  | 0.05 |

|                 |           |      |        |      |
|-----------------|-----------|------|--------|------|
| ENSG00000115568 | ZNF142    | 0.81 | -0.30  | 0.05 |
| ENSG00000162896 | PIGR      | 0.40 | -1.32  | 0.05 |
| ENSG00000267303 | AC011511  | 0.00 | -13.03 | 0.05 |
| ENSG00000156026 | MCU       | 0.87 | -0.21  | 0.05 |
| ENSG00000029534 | ANK1      | 0.32 | -1.65  | 0.05 |
| ENSG00000263006 | ROCK1P1   | 0.51 | -0.97  | 0.05 |
| ENSG00000230699 | AL645608  | 0.17 | -2.57  | 0.05 |
| ENSG00000113456 | RAD1      | 0.81 | -0.30  | 0.05 |
| ENSG00000176826 | FKBP9P1   | 0.38 | -1.40  | 0.05 |
| ENSG00000282826 | FRG1CP    | 0.76 | -0.40  | 0.05 |
| ENSG00000136274 | NACAD     | 0.21 | -2.26  | 0.05 |
| ENSG00000185885 | IFITM1    | 0.53 | -0.93  | 0.05 |
| ENSG00000101193 | GID8      | 0.87 | -0.21  | 0.05 |
| ENSG00000275215 | RNA5-8SN3 | 0.12 | -3.01  | 0.05 |
| ENSG00000215063 | RPL21P2   | 0.00 | -11.05 | 0.05 |
| ENSG00000251562 | MALAT1    | 0.49 | -1.04  | 0.05 |
| ENSG00000099800 | TIMM13    | 0.87 | -0.20  | 0.05 |
| ENSG00000152475 | ZNF837    | 0.57 | -0.82  | 0.05 |
| ENSG00000140526 | ABHD2     | 0.87 | -0.20  | 0.05 |
